# Supplementary material for: Trans-ethnic genome-wide meta-analysis of 35,732 cases and 34,424 controls identifies novel genomic cross-ancestry loci contributing to lung cancer susceptibility
Source: bioRxiv or medRxiv preprint supplement (doi:10.1101/2020.10.06.20207753), 2020-10-07

**Title:** Trans-ethnic genome-wide meta-analysis of 35,732 cases and 34,424 controls identifies novel genomic cross-ancestry loci contributing to lung cancer susceptibility

## Supplementary Figure 1. Genomic regional plots on 5p15.33 and 15q25.1

### A. TERT and CLPTM1L on 5p15.33

#### Lung Adenocarcinoma

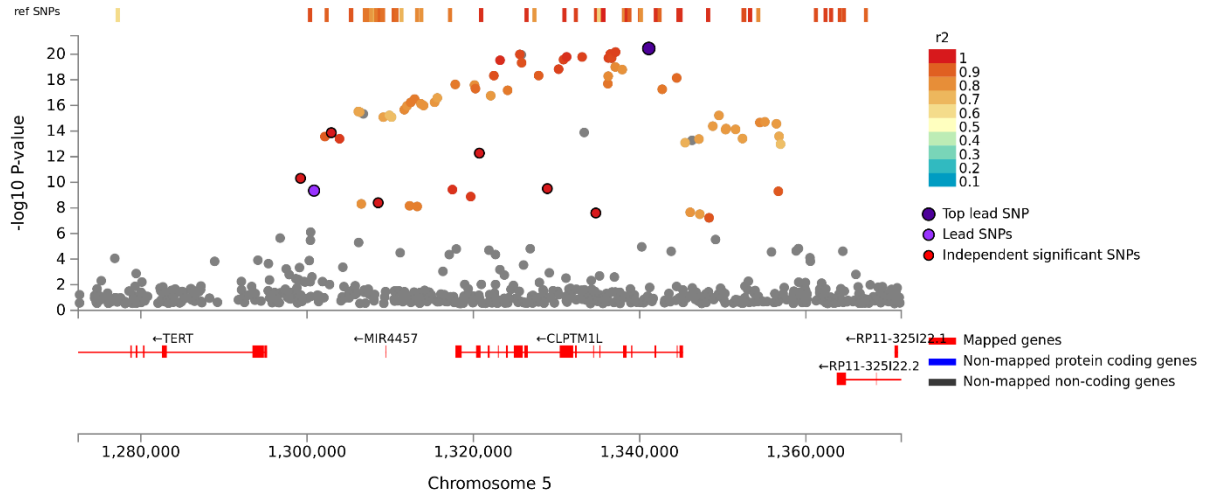

#### Lung Squamous Cell Carcinoma

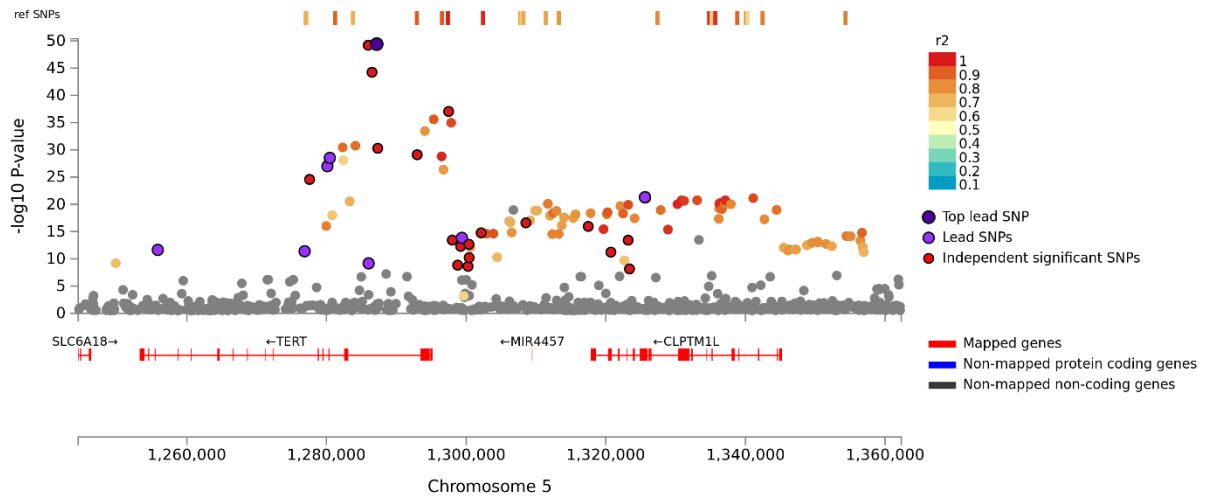

## B. CHRNA5 on 15q25.1

### Lung Adenocarcinoma

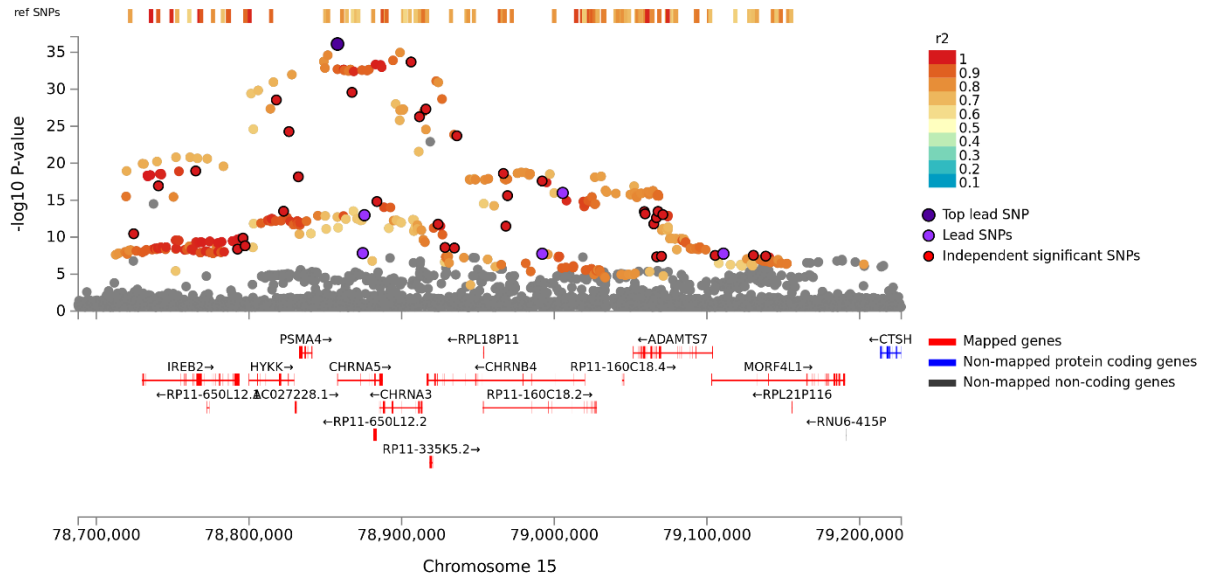

### Lung Squamous Cell Carcinoma

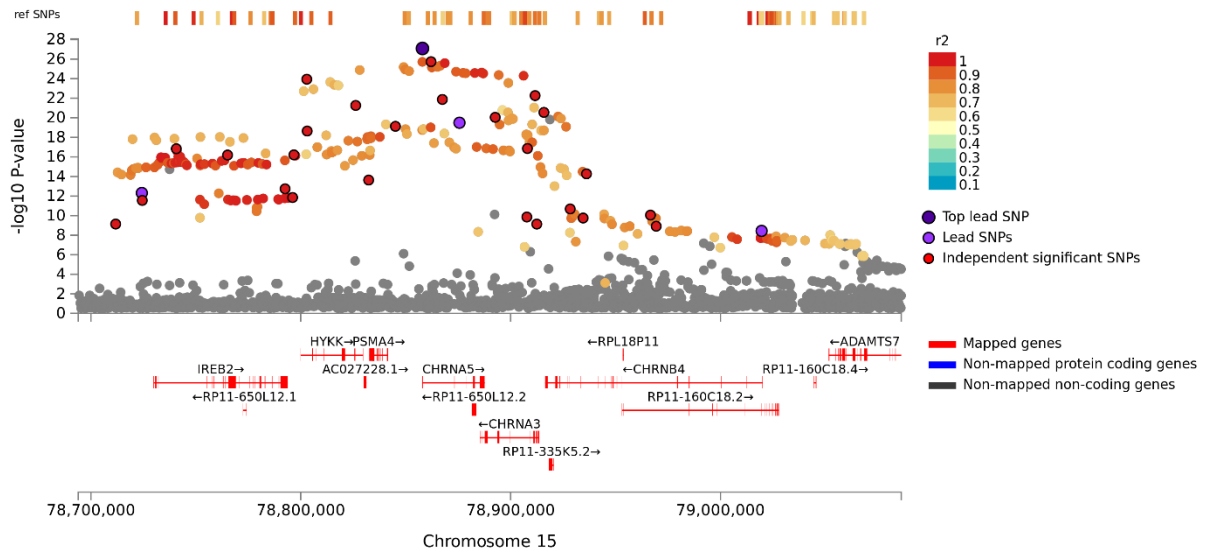

# Lung Small Cell Carcinoma

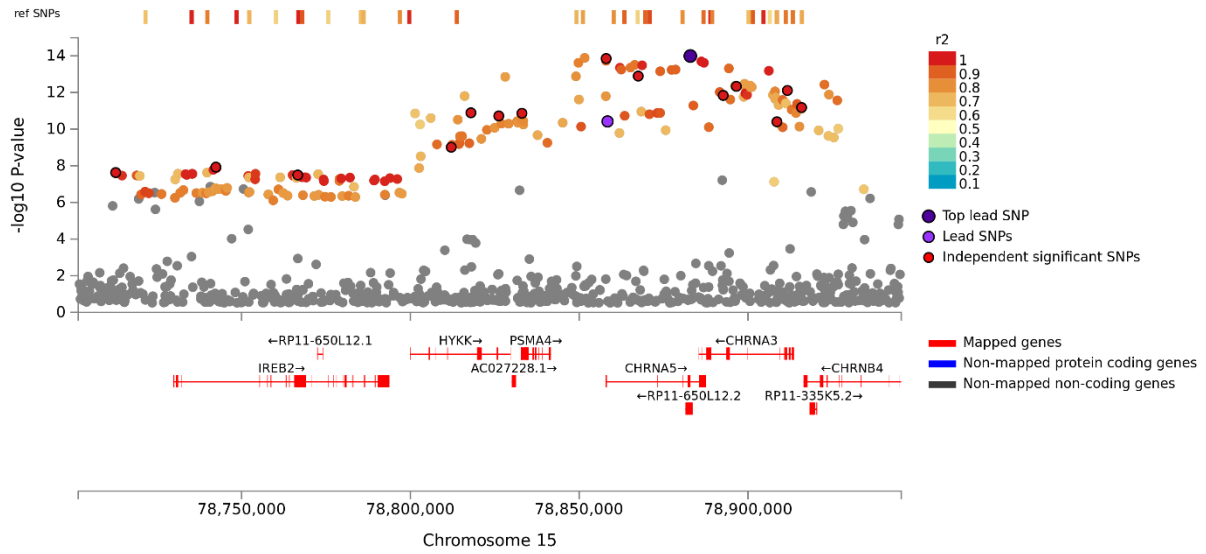

**Title:** Trans-ethnic genome-wide meta-analysis of 35,732 cases and 34,424 controls identifies novel genomic cross-ancestry loci contributing to lung cancer susceptibility

# Supplementary Figure 2

## Genomic Regional Plots

- 1. Lung: Lung Carcinoma**
- 2. LUAD: Lung Adenocarcinoma**
- 3. LUSQC: Lung Squamous Cell Carcinoma**
- 4. LUSCC: Lung Small Cell Carcinoma**

# Lung Carcinoma

Lung : ZFP42\_TRIML2 – Combined

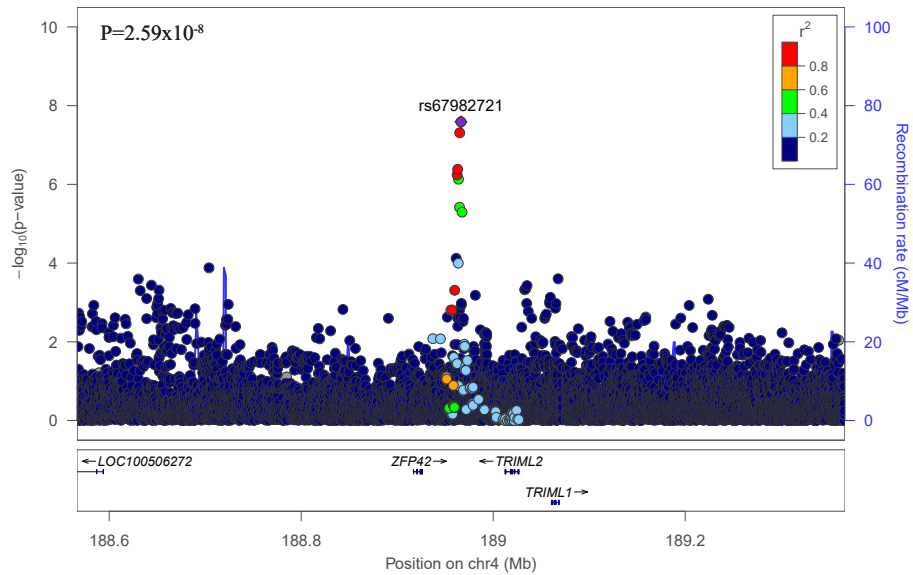

Lung : ZFP42\_TRIML2 – European

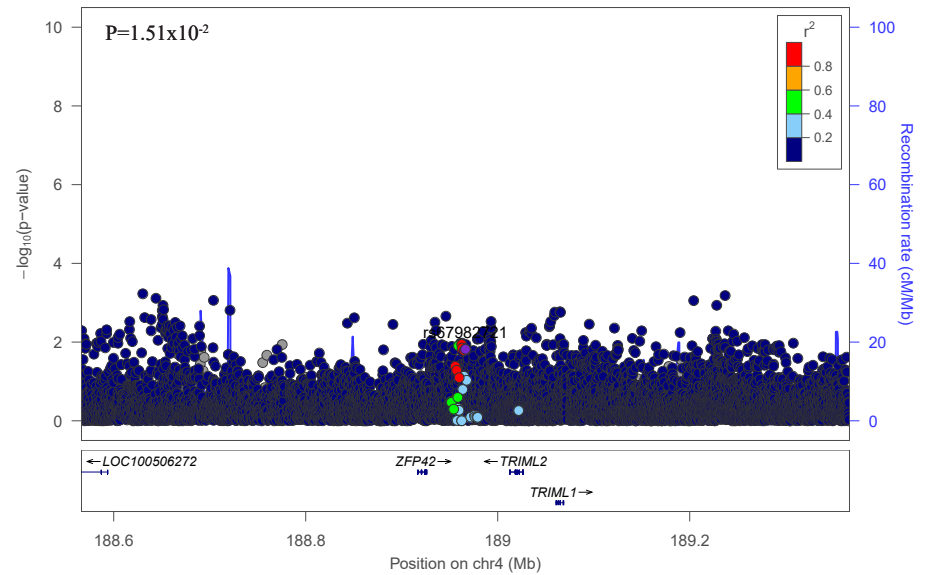

Lung : ZFP42\_TRIML2 – Asian

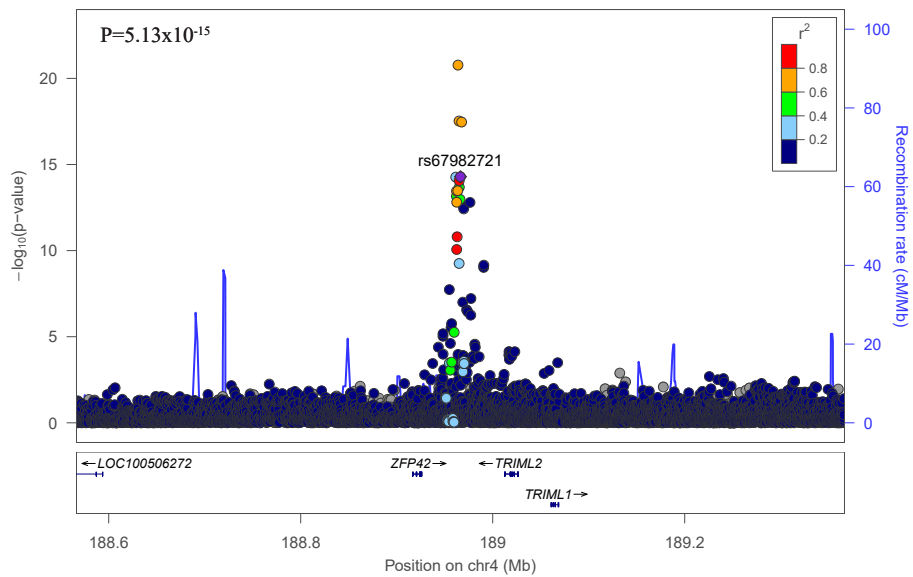

Lung : ZFP42\_TRIML2 – African

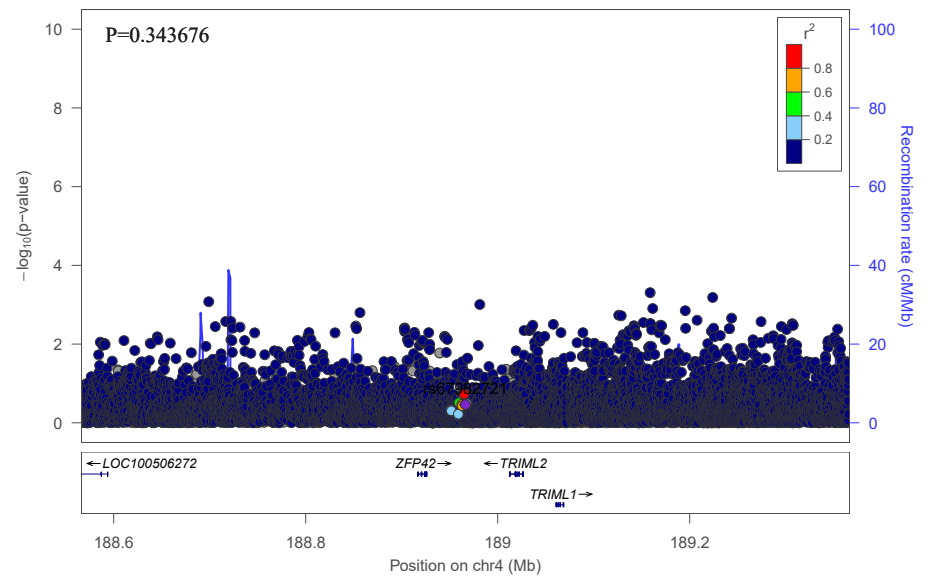

Lung : LINC01511 – Combined

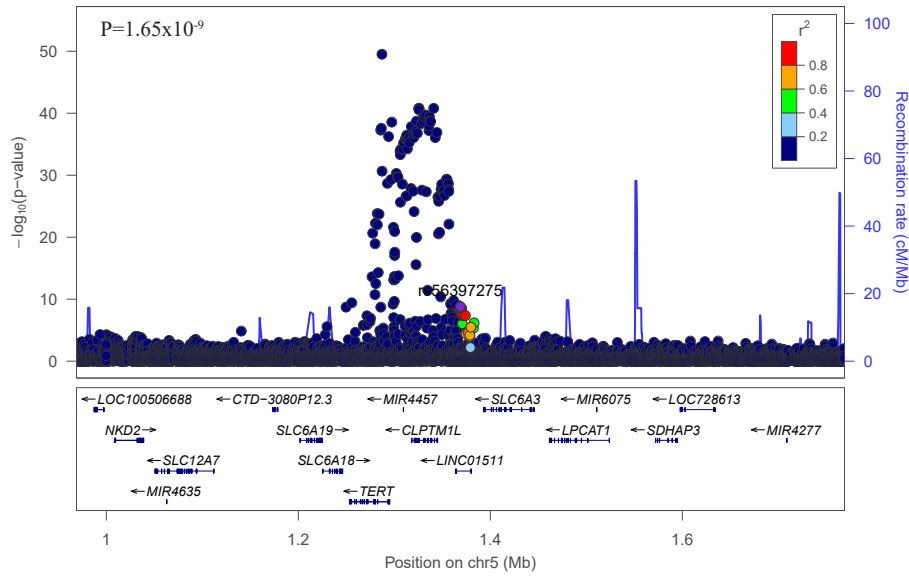

Lung : LINC01511 – European

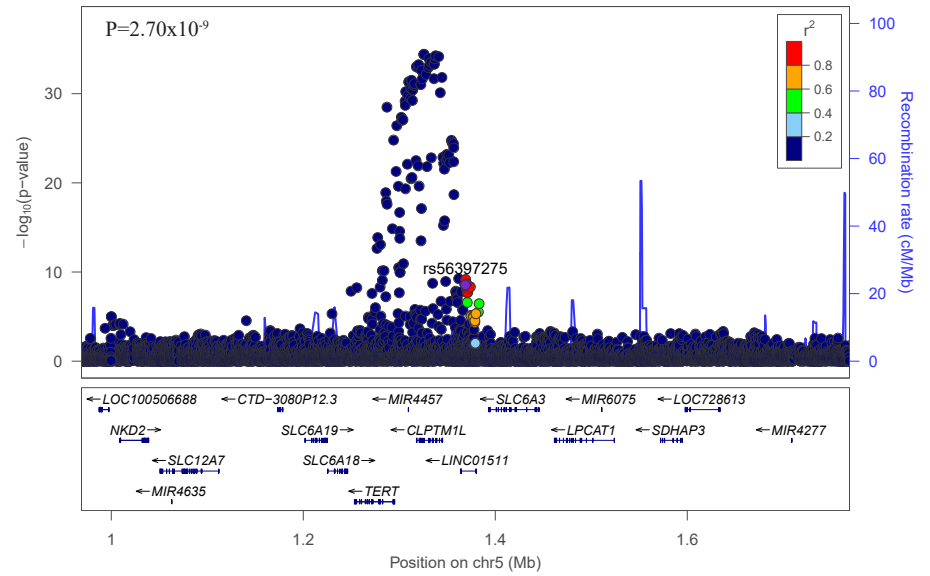

Lung : LINC01511 – Asian

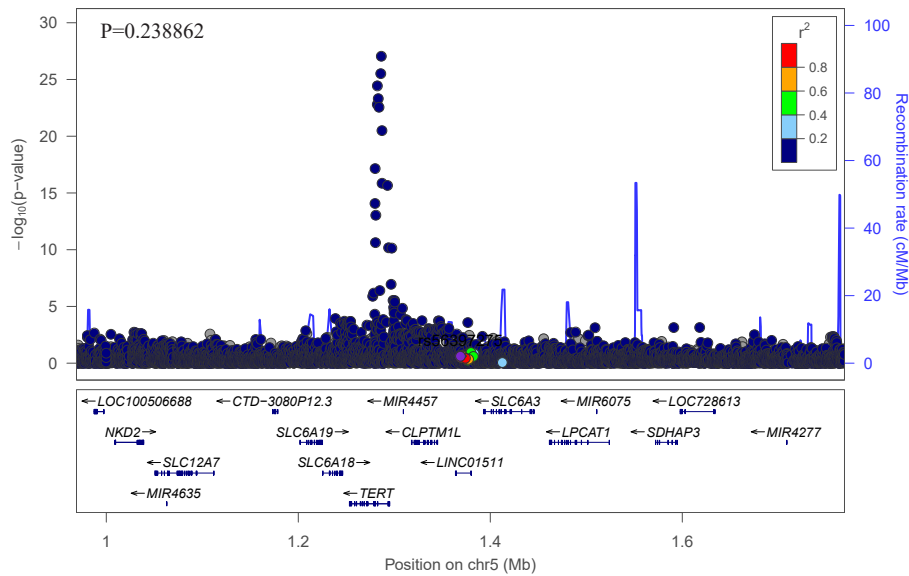

Lung : LINC01511 – African

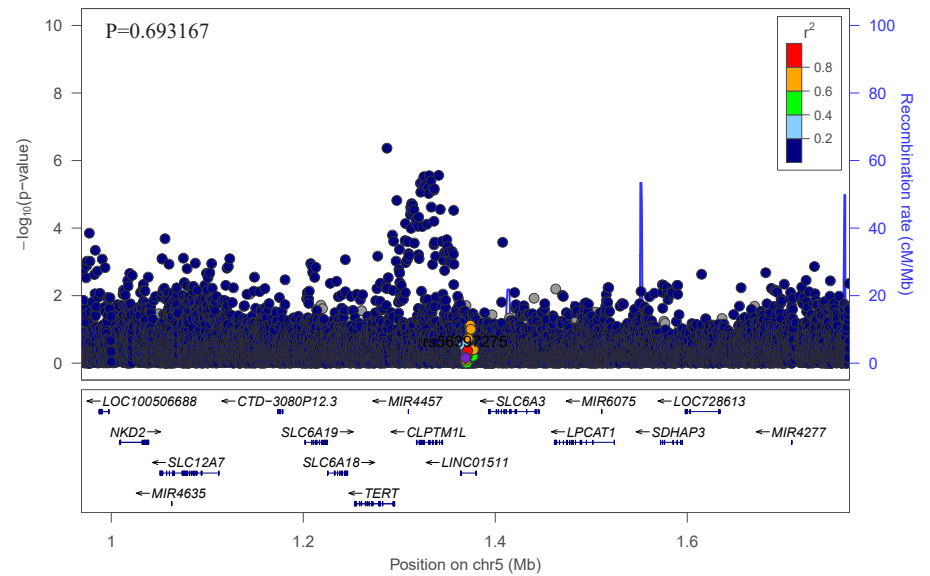

Lung : YTHDC2\_KCNN2 – Combined

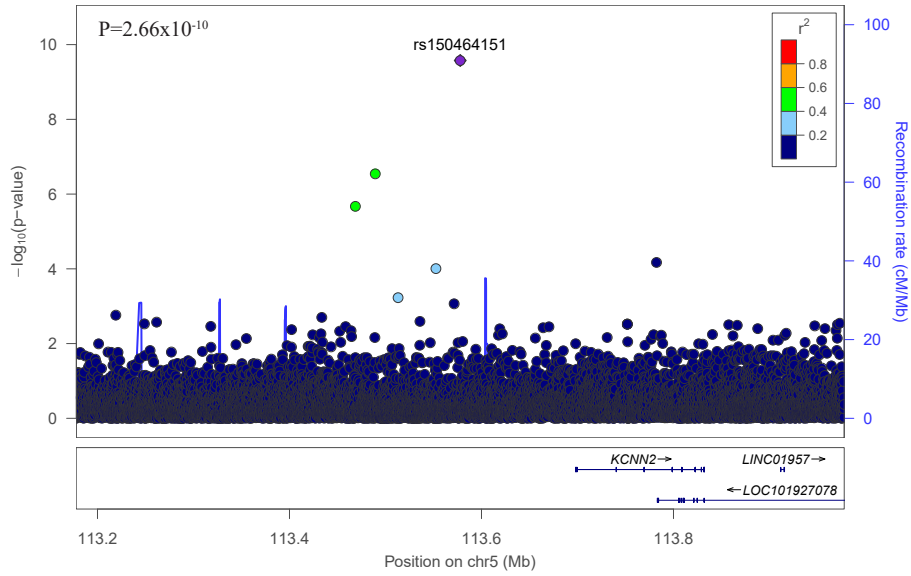

Lung : YTHDC2\_KCNN2 – European

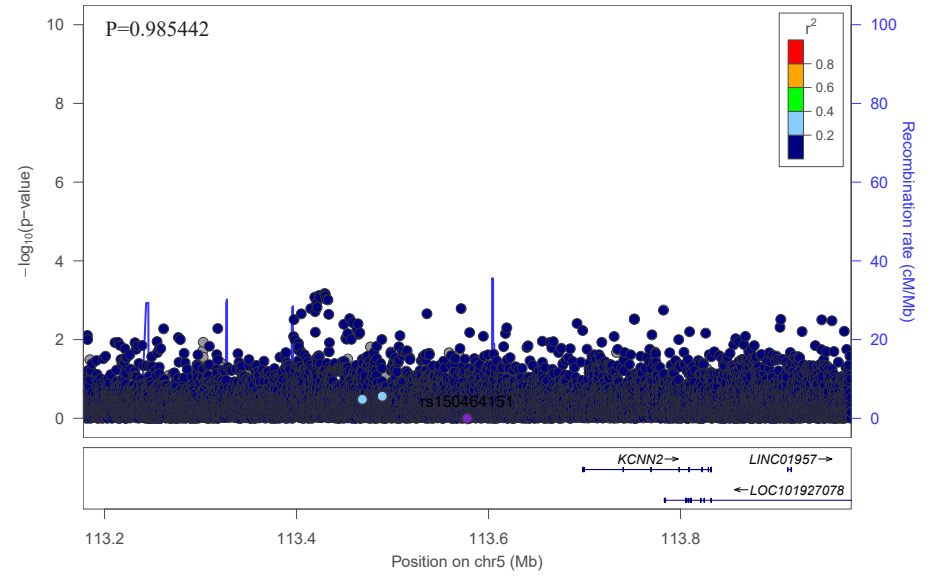

Lung : YTHDC2\_KCNN2 – Asian

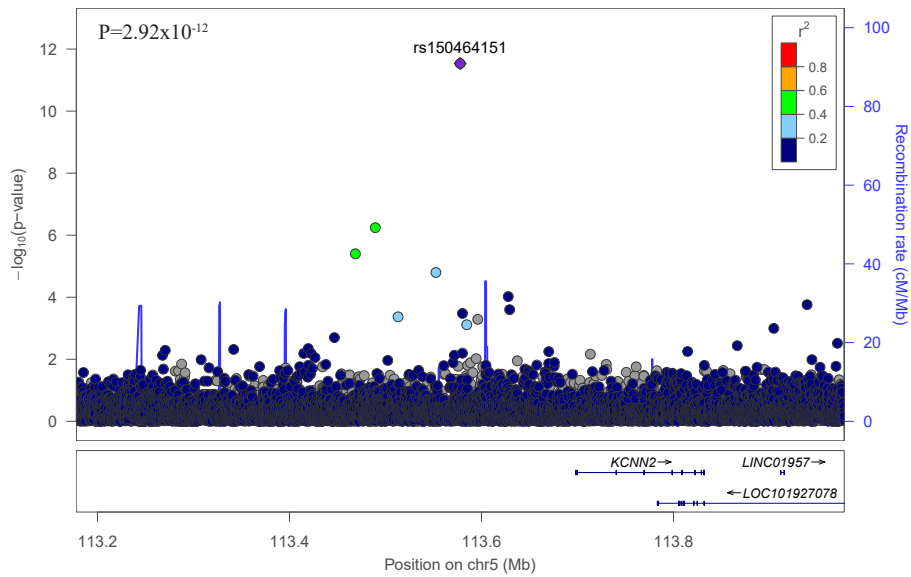

Lung : YTHDC2\_KCNN2 – African

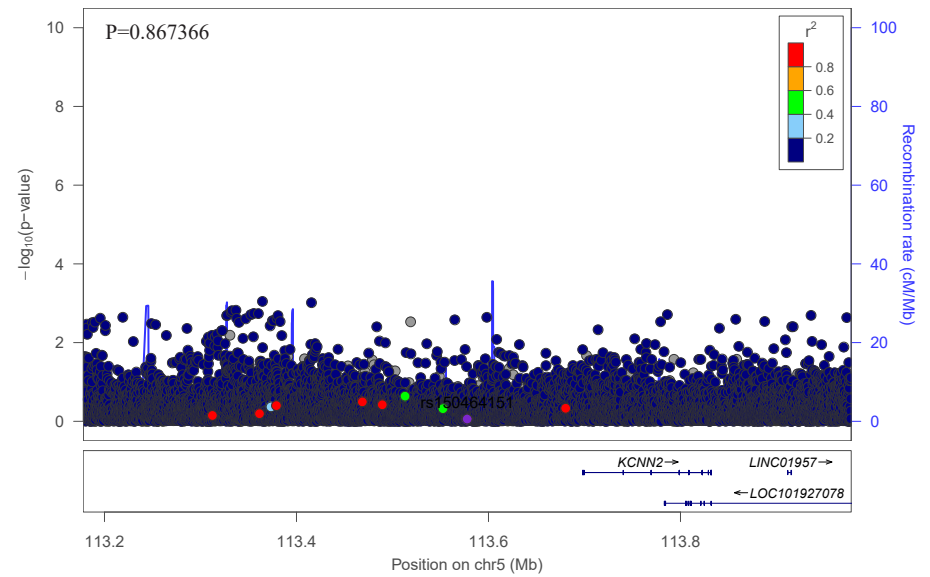



Lung : HLA-DRB1\_HLA-DQA1 – Combined

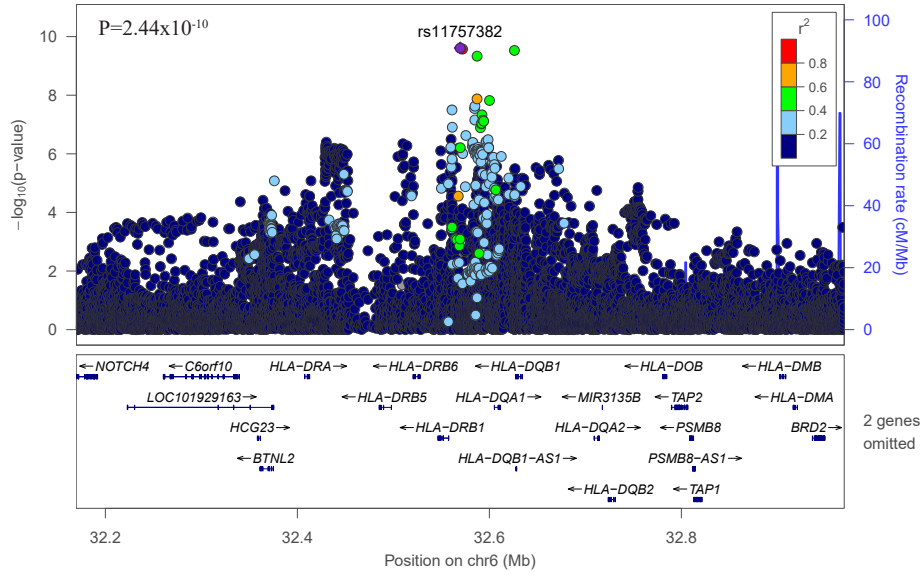

Lung : HLA-DRB1\_HLA-DQA1 – European

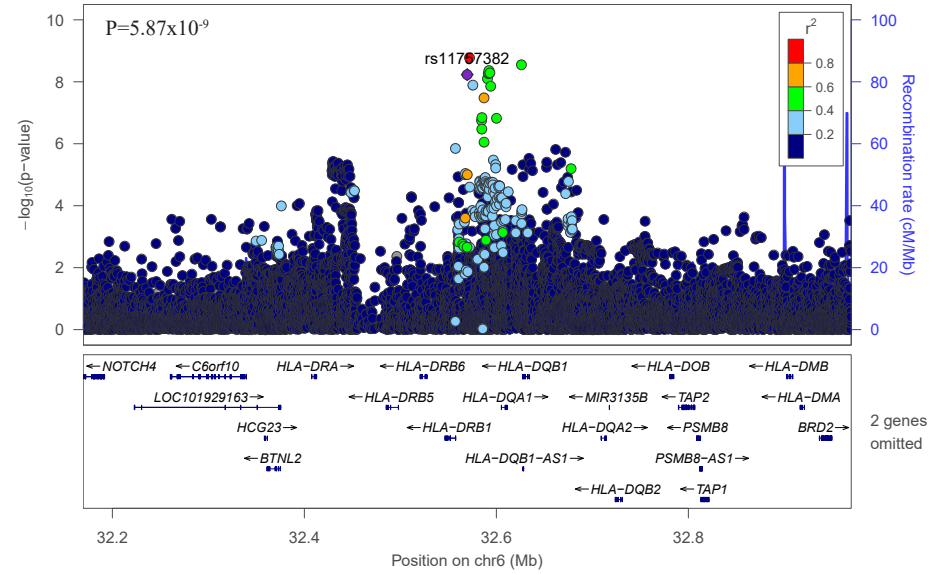

Lung : HLA-DRB1\_HLA-DQA1 – Asian

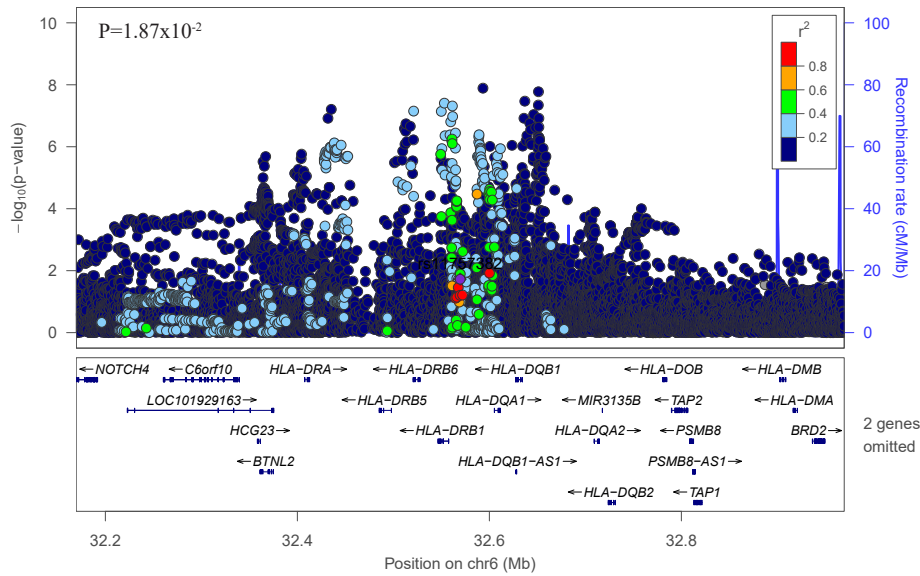

Lung : HLA-DRB1\_HLA-DQA1 – African

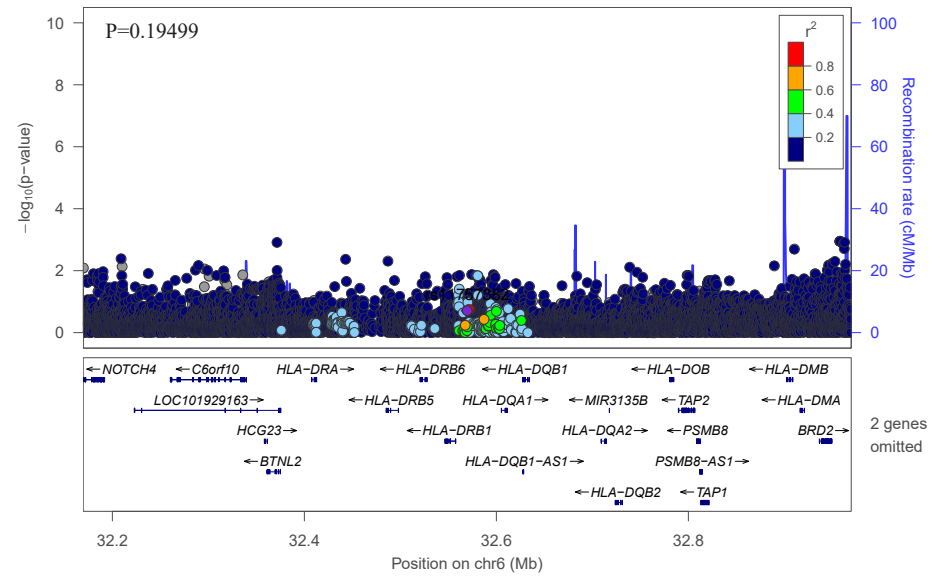

Lung : IRF4 – Combined

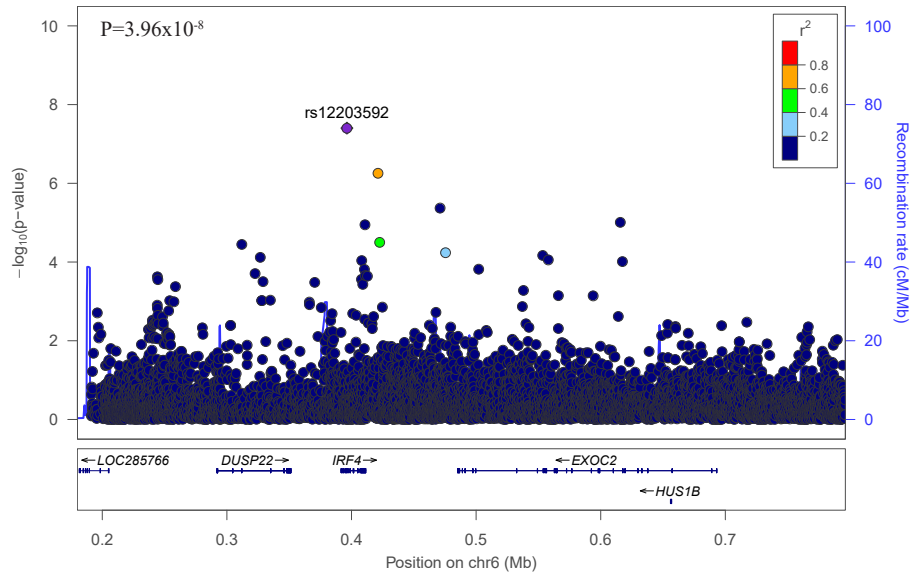

Lung : IRF4 – European

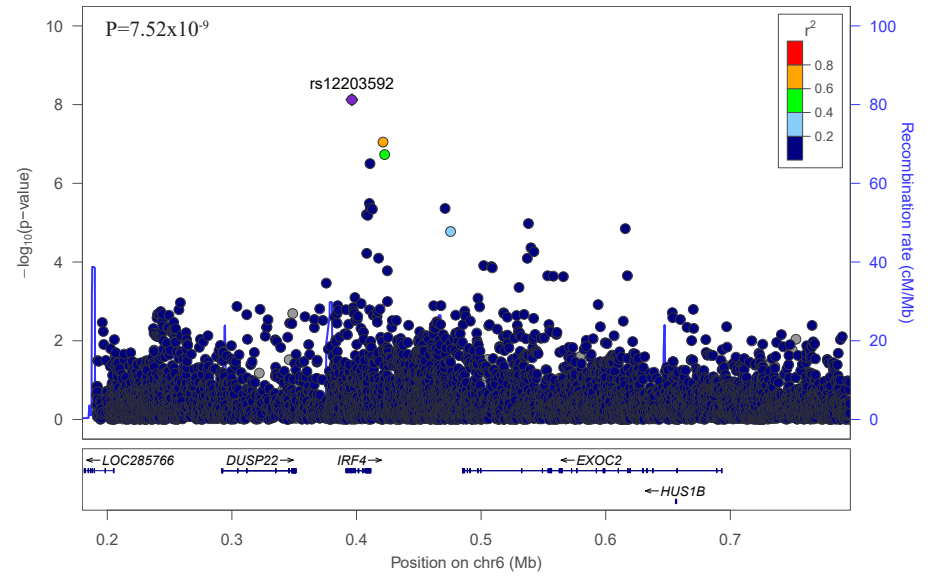

Lung : IRF4 – Asian

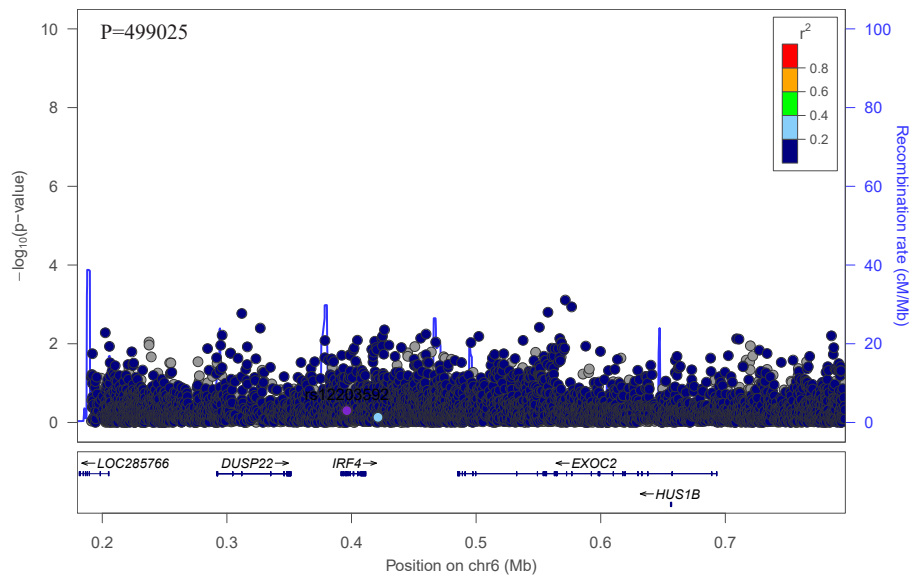

Lung : IRF4 – African

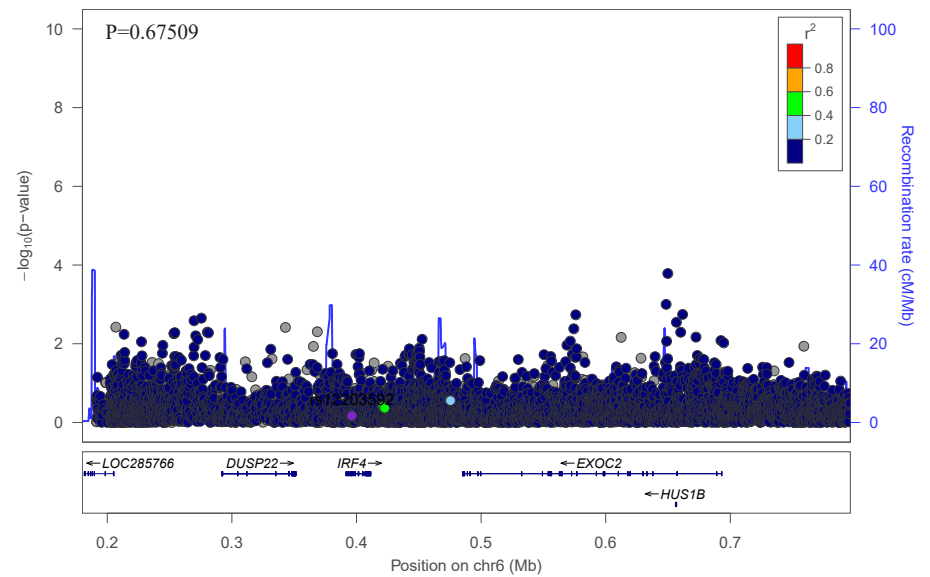

Lung : PPIL6 – Combined

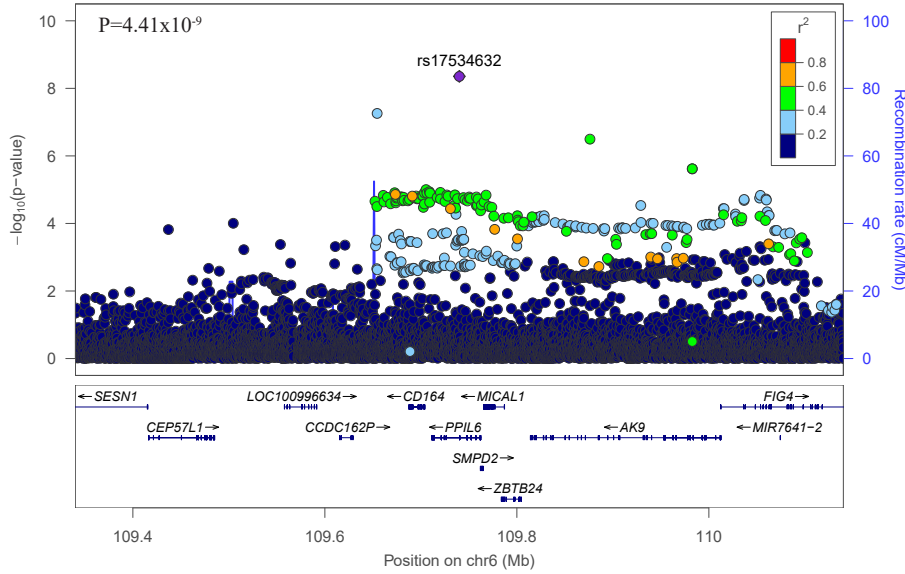

Lung : PPIL6 – European

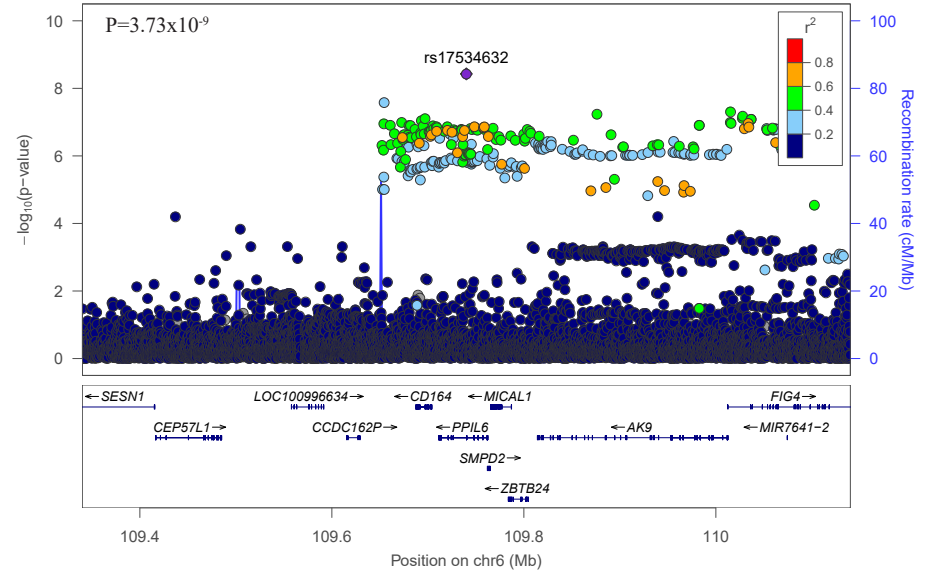

Lung : PPIL6 – Asian

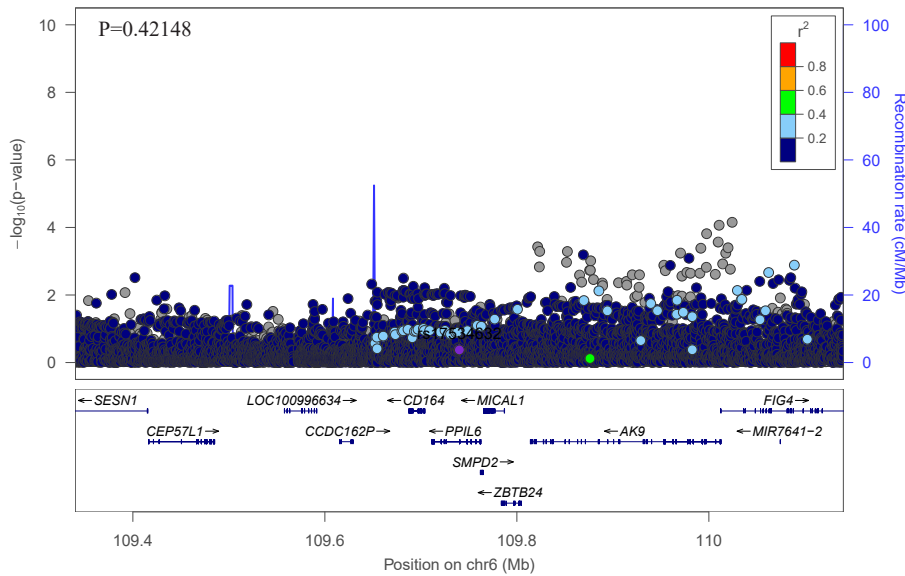

Lung : PPIL6 – African

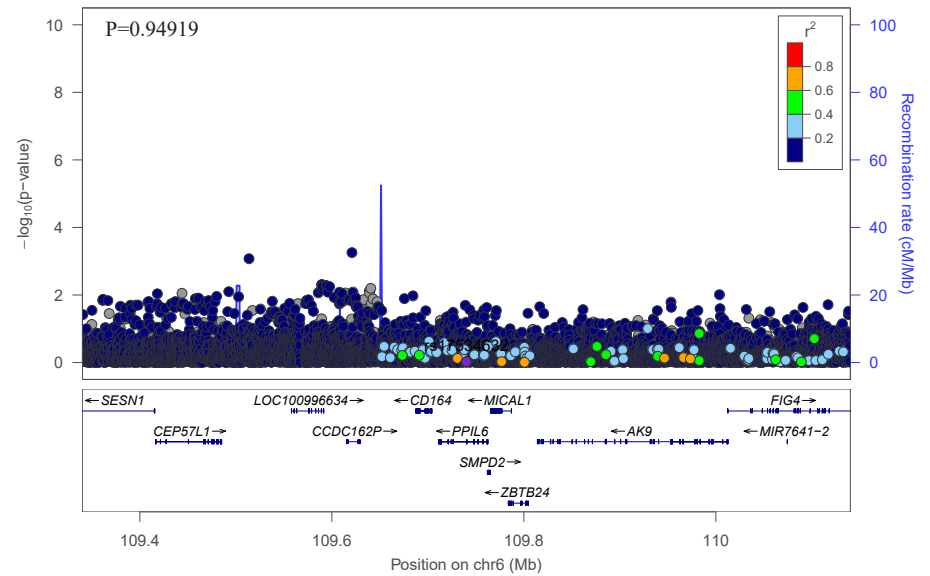

Lung : JAML – Combined

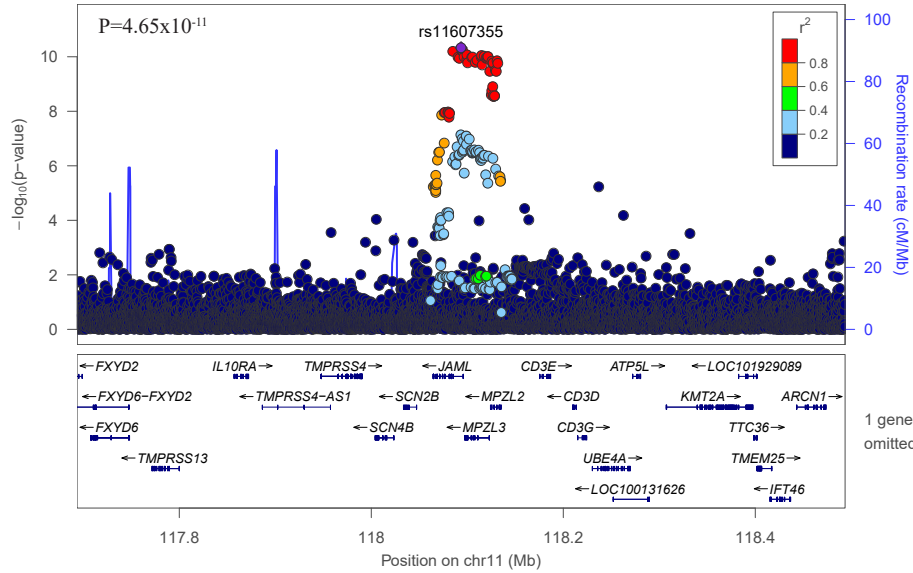

Lung : JAML – European

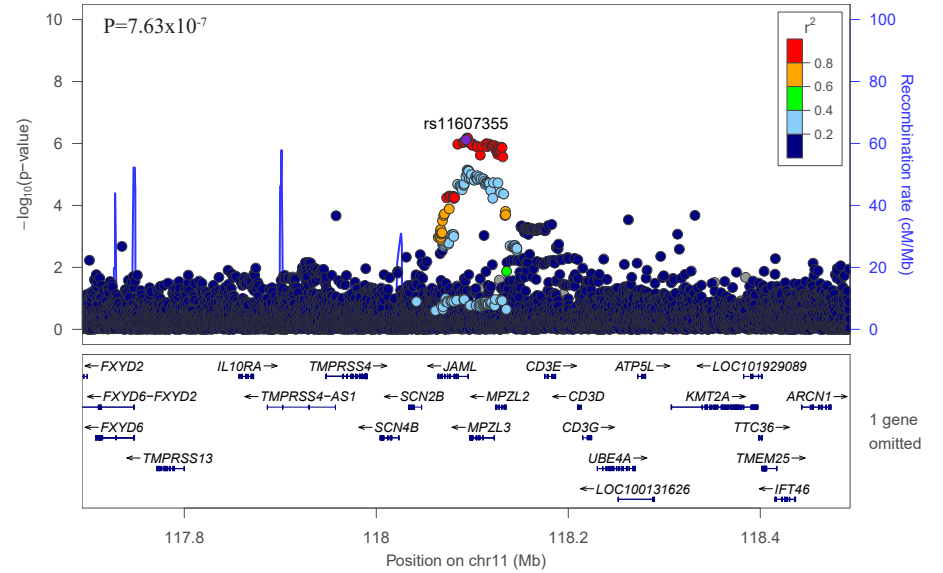

Lung : JAML – Asian

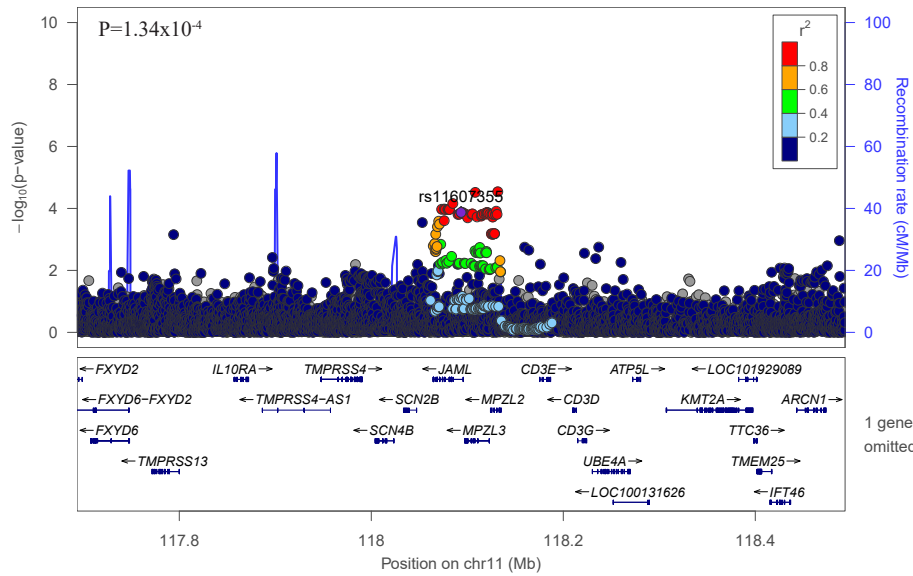

Lung : JAML – African

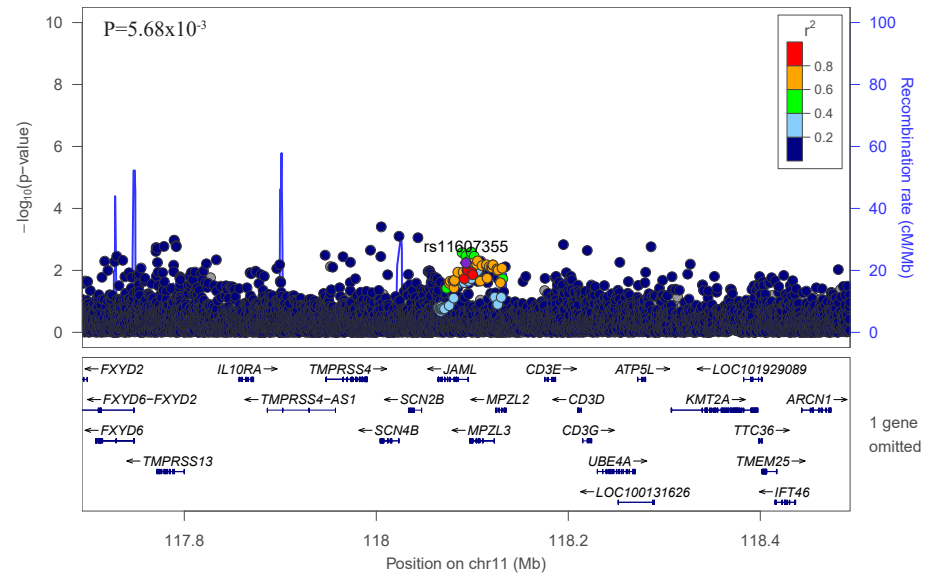

Lung : TBX3\_MED13L – Combined

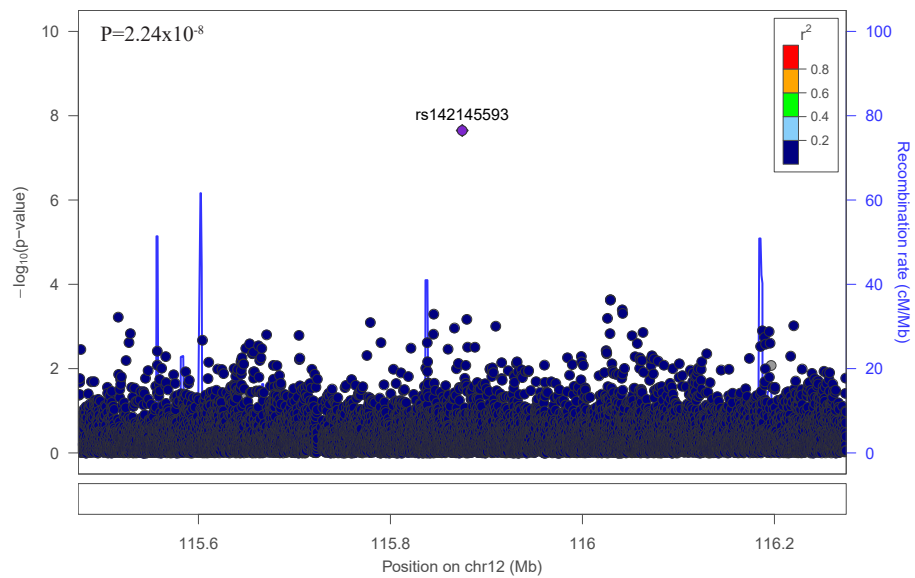

Lung : TBX3\_MED13L – European

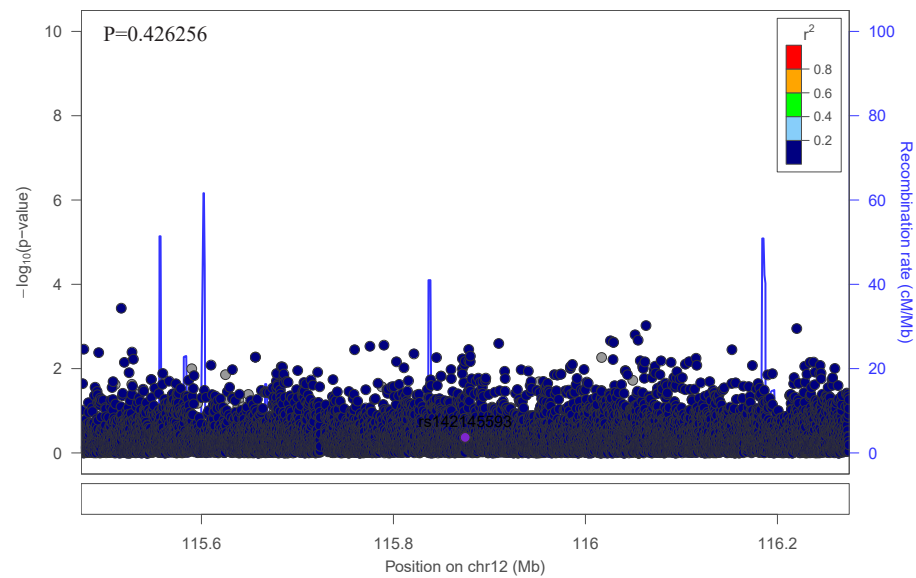

Lung : TBX3\_MED13L – Asian

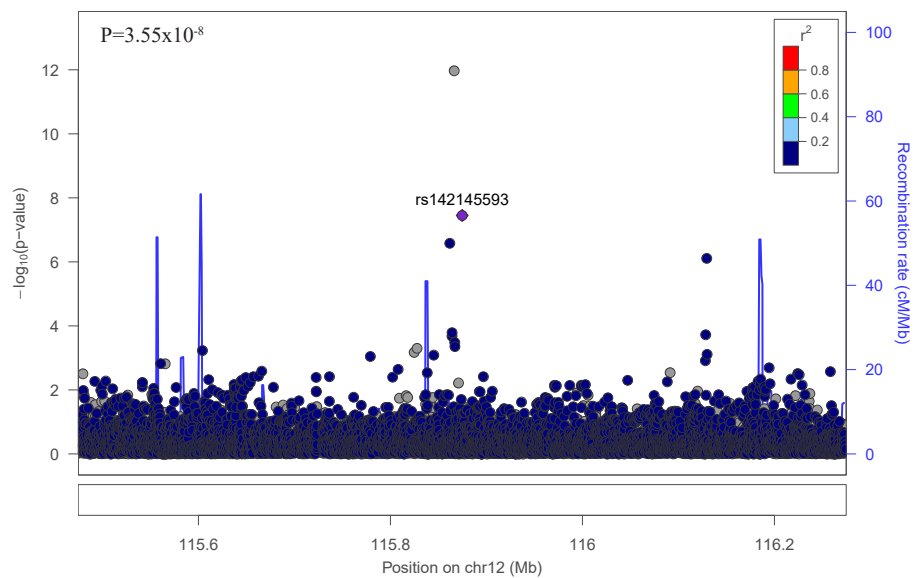

Lung : TBX3\_MED13L – African

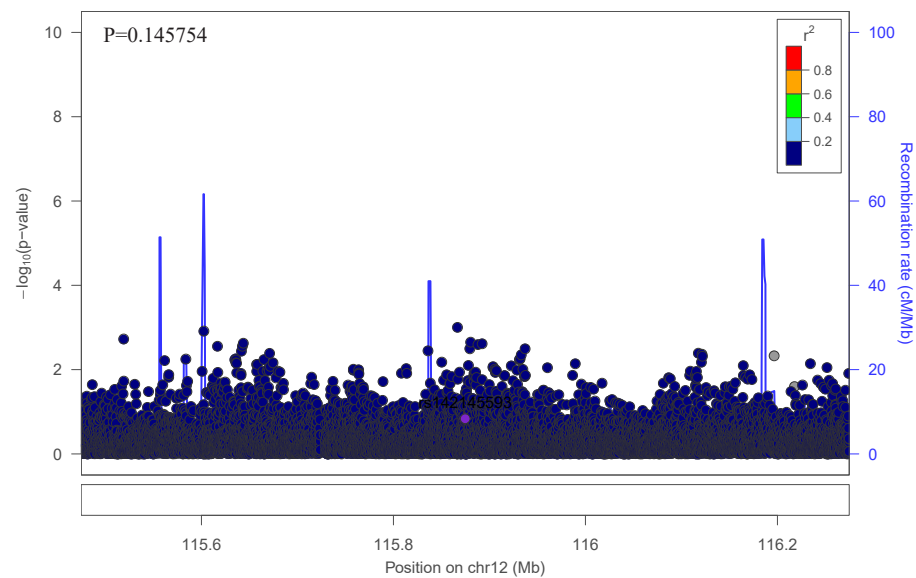

Lung : C20orf187 – Combined

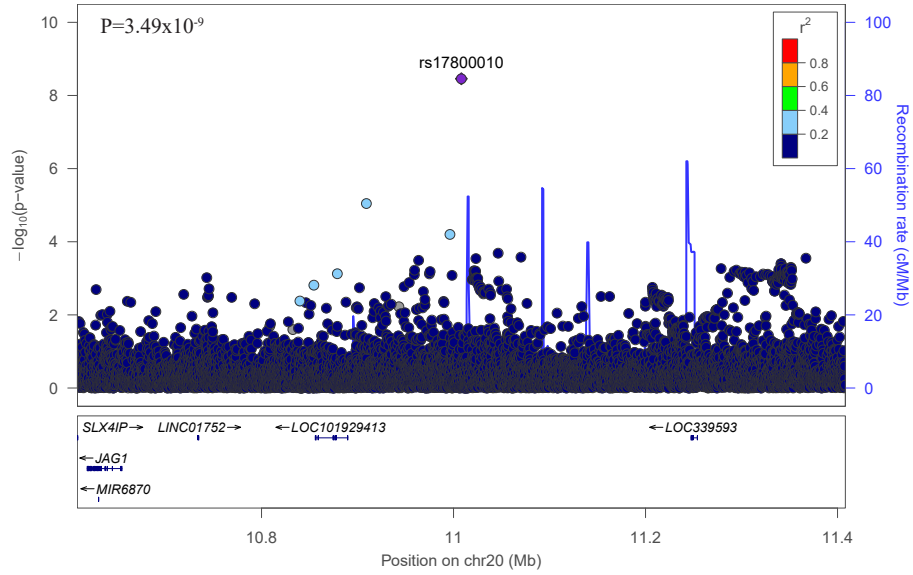

Lung : C20orf187 – European

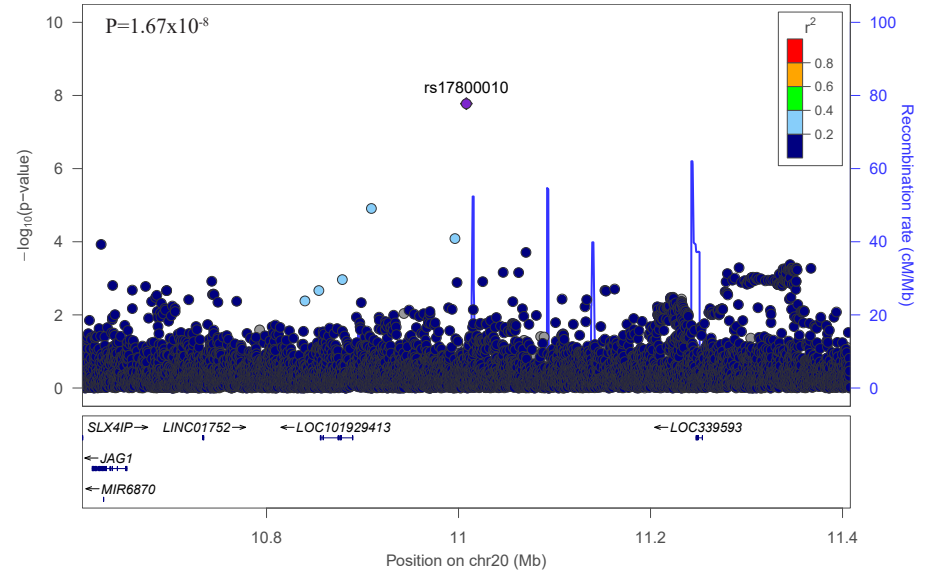

Lung : C20orf187 – Asian

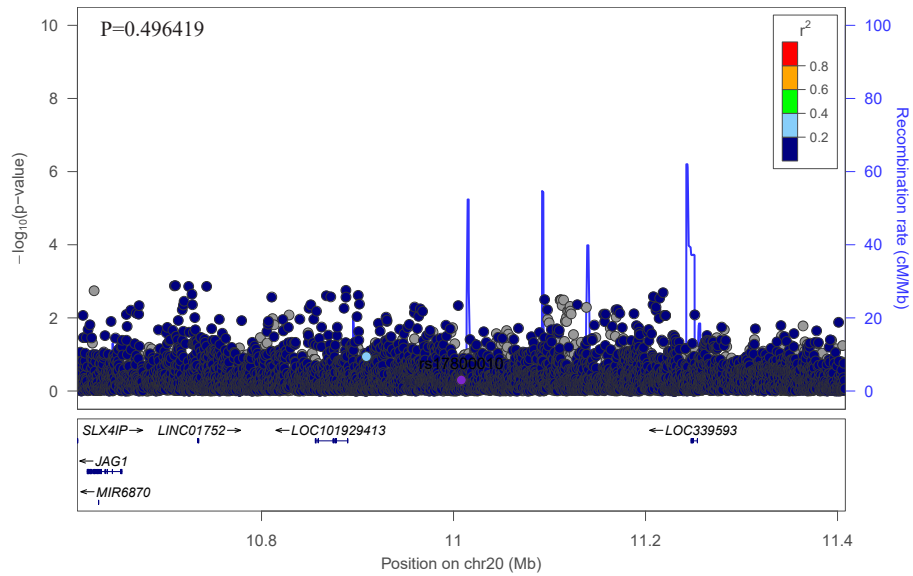

Lung : C20orf187 – African

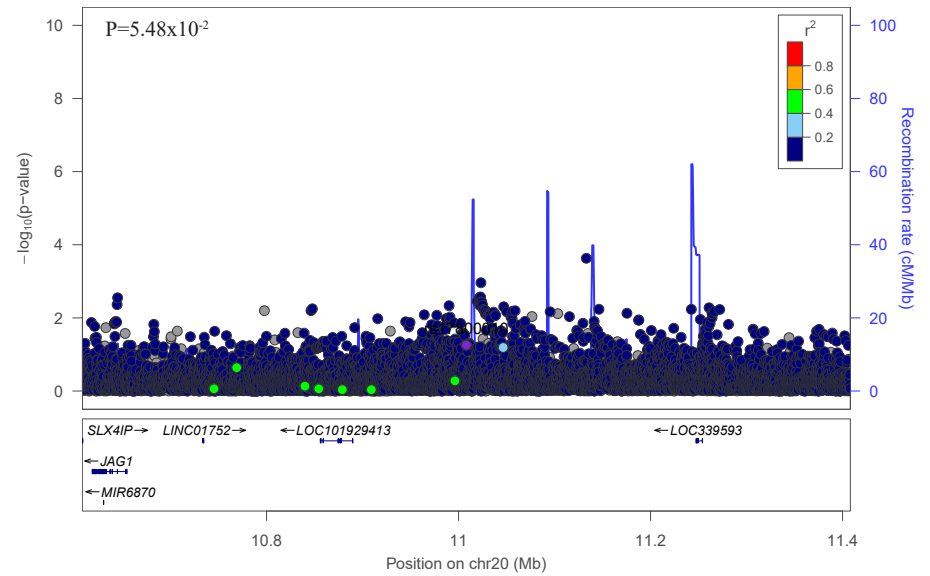

Lung : BTBD3\_LINC01722 – Combined

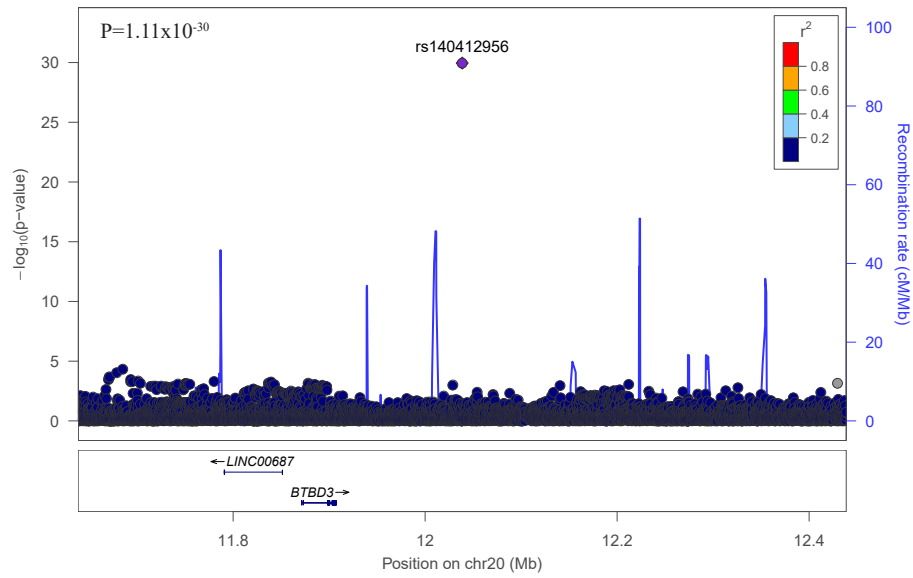

Lung : BTBD3\_LINC01722 – European

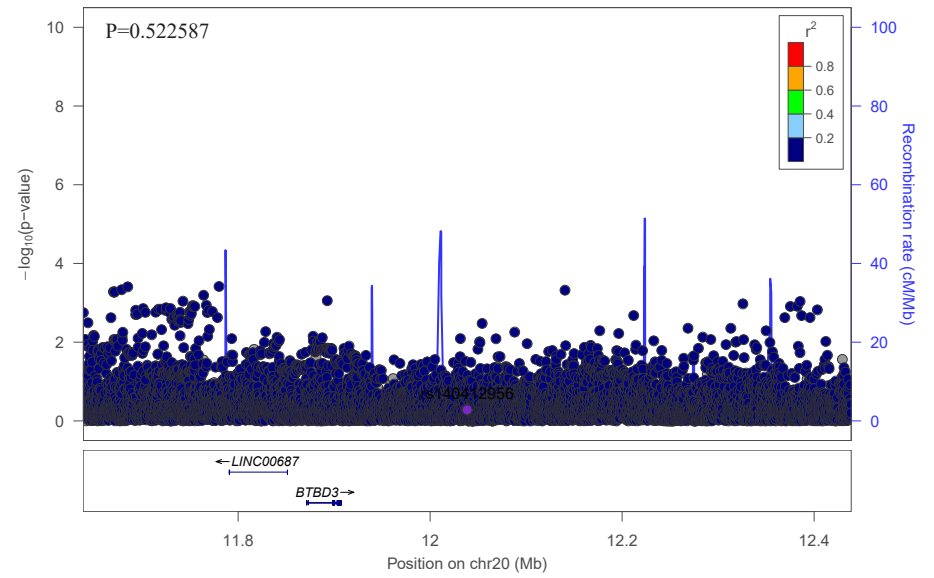

Lung : BTBD3\_LINC01722 – Asian

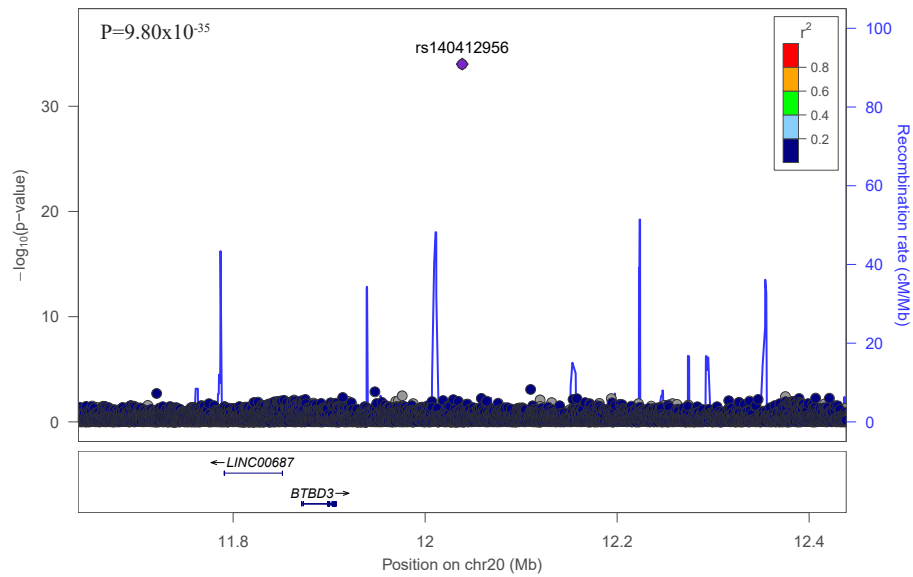

Lung : BTBD3\_LINC01722 – African

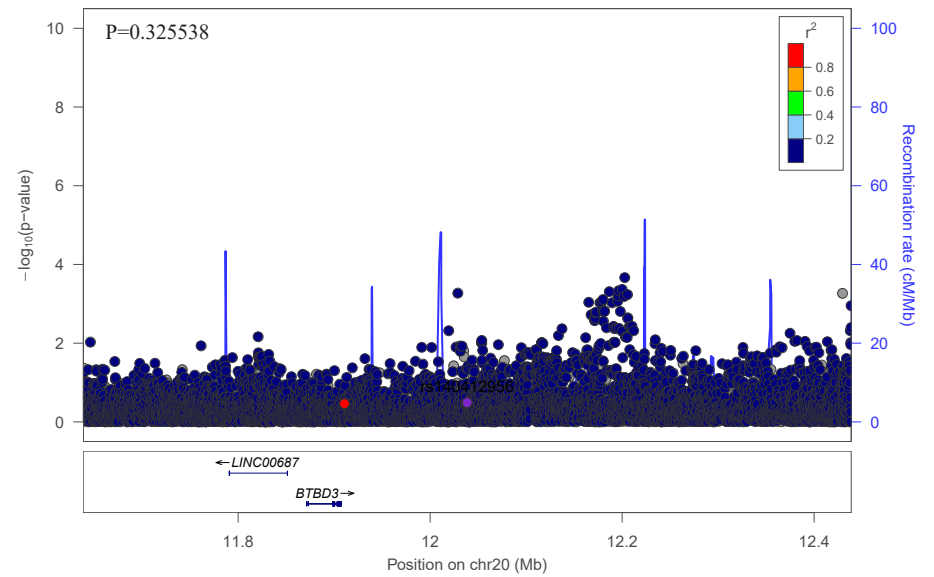

Adenocarcinoma



LUAD : ACTR2 – Combined

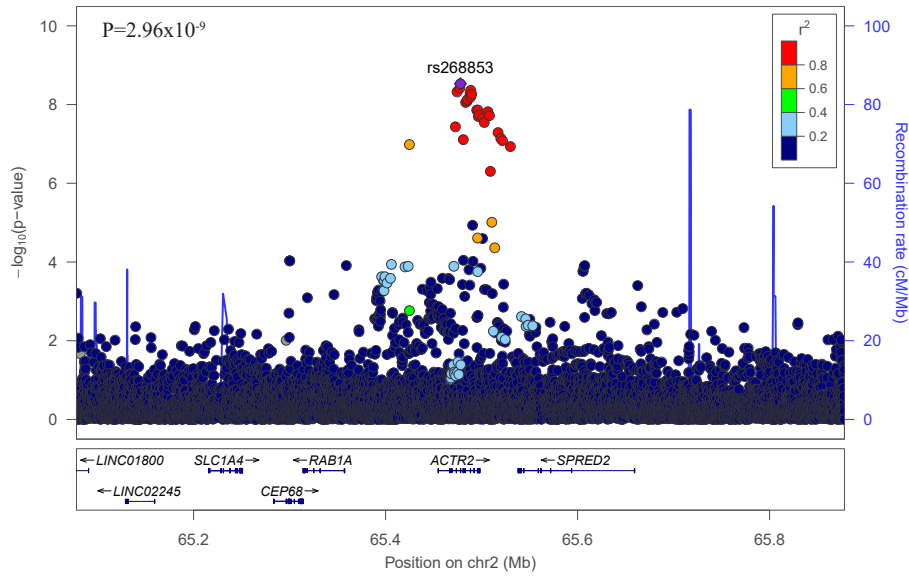

LUAD : ACTR2 – European

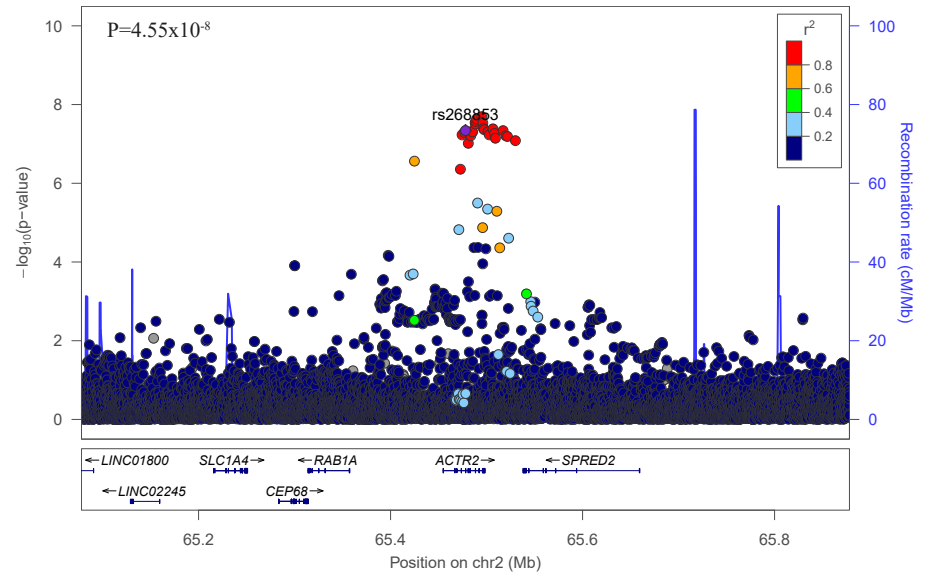

LUAD : ACTR2 – Asian

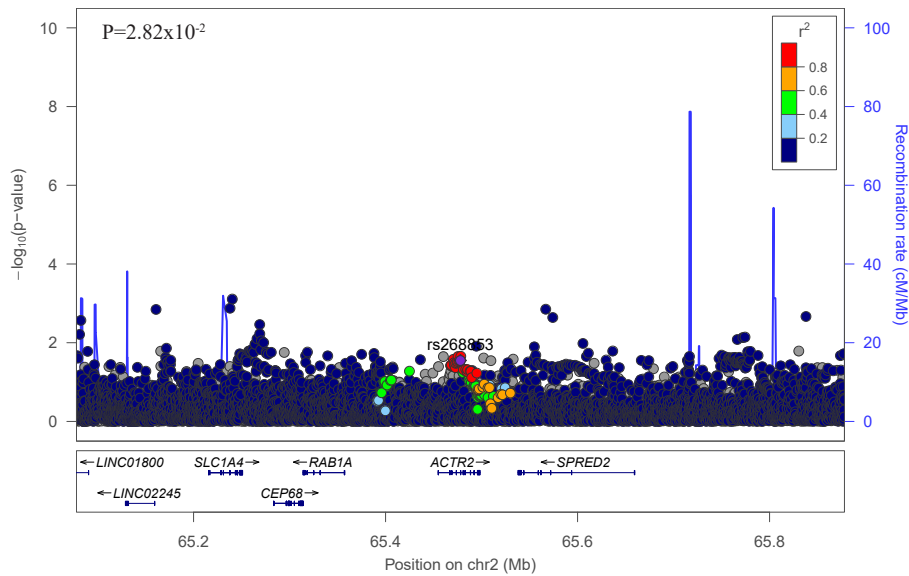

LUAD : ACTR2 – African

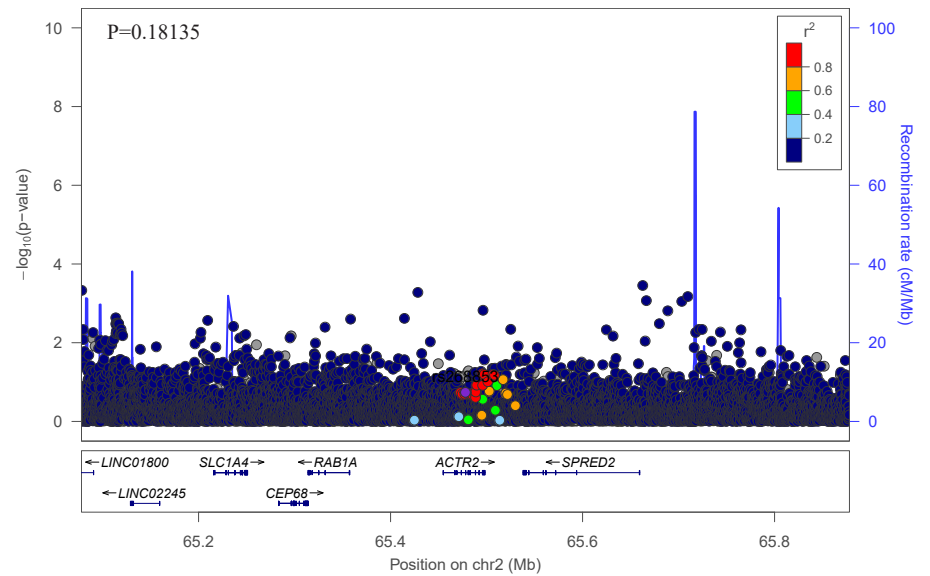

LUAD : TP63 – Combined

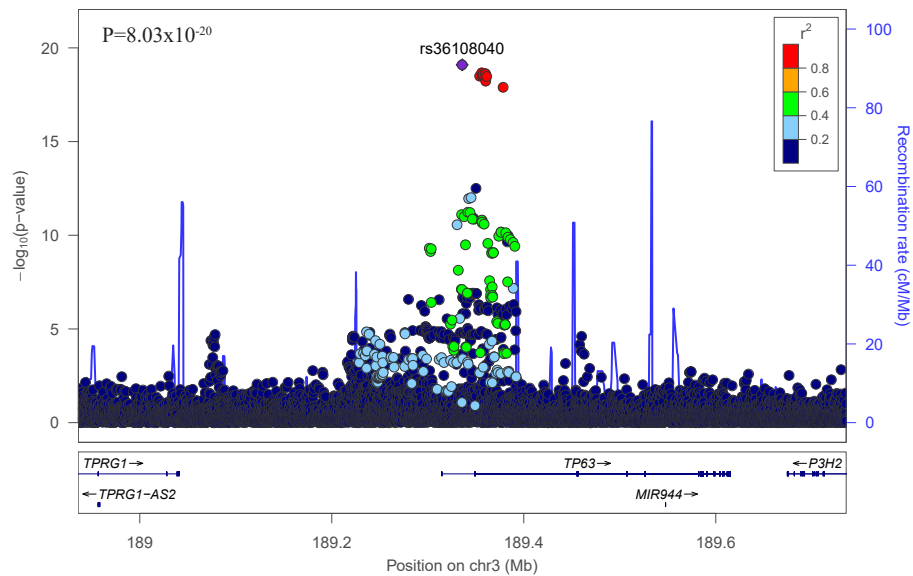

LUAD : TP63 – European

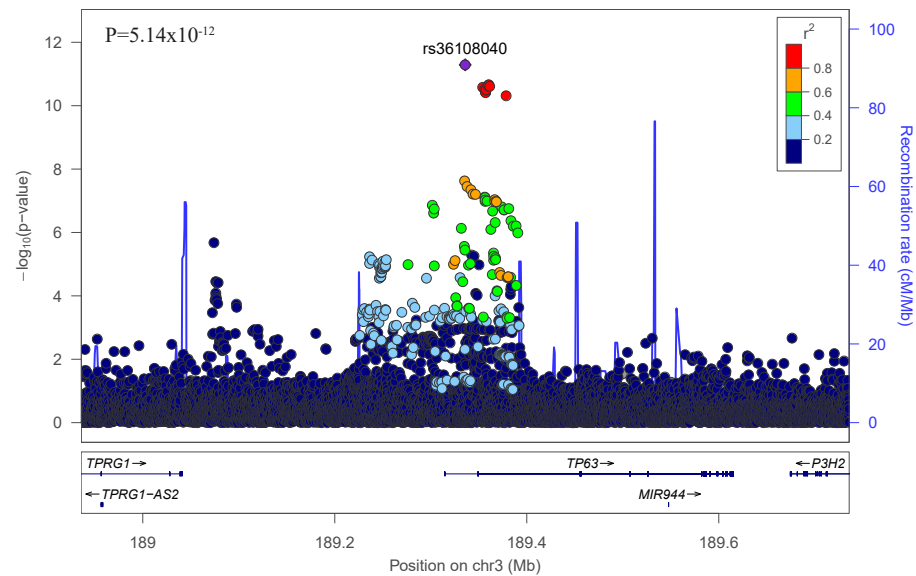

LUAD : TP63 – Asian

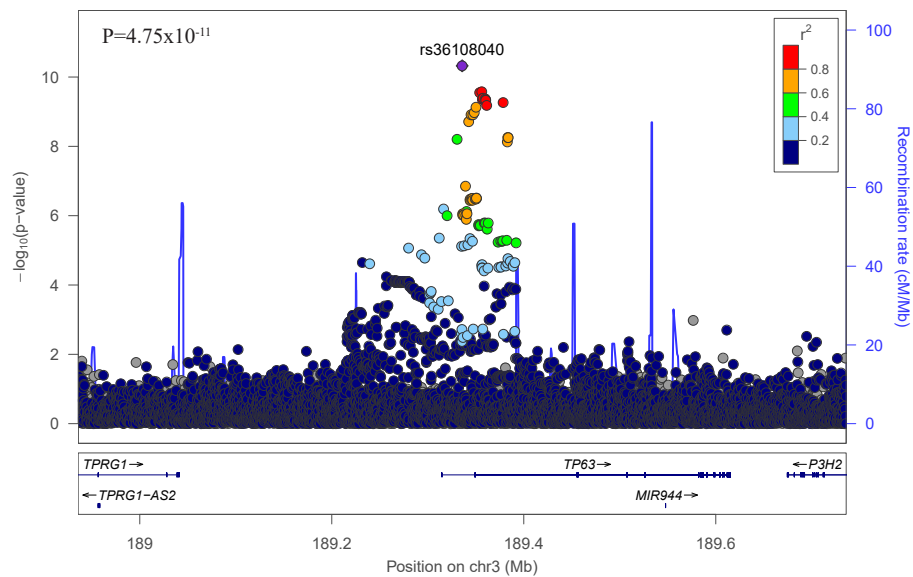

LUAD : TP63 – African

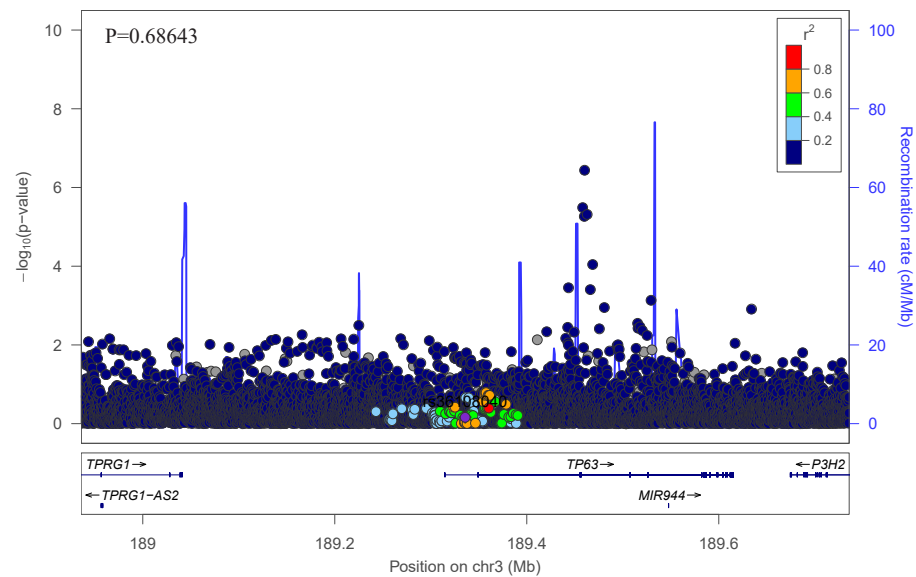

LUAD : ANKRD33B – Combined

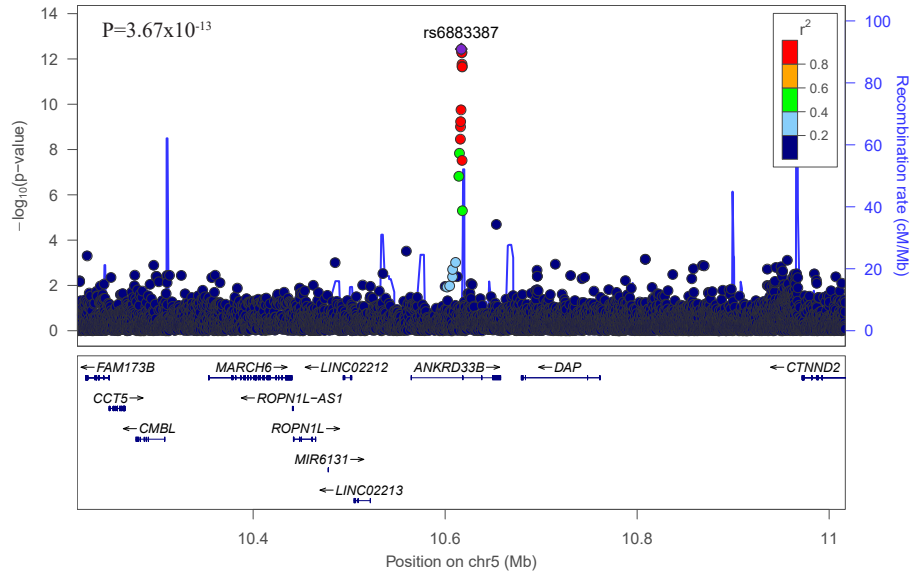

LUAD : ANKRD33B – European

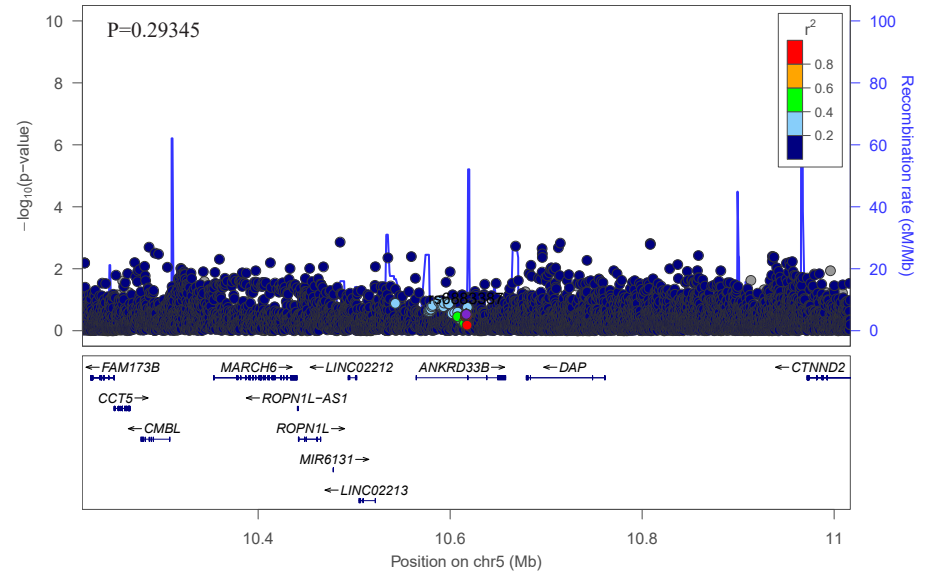

LUAD : ANKRD33B – Asian

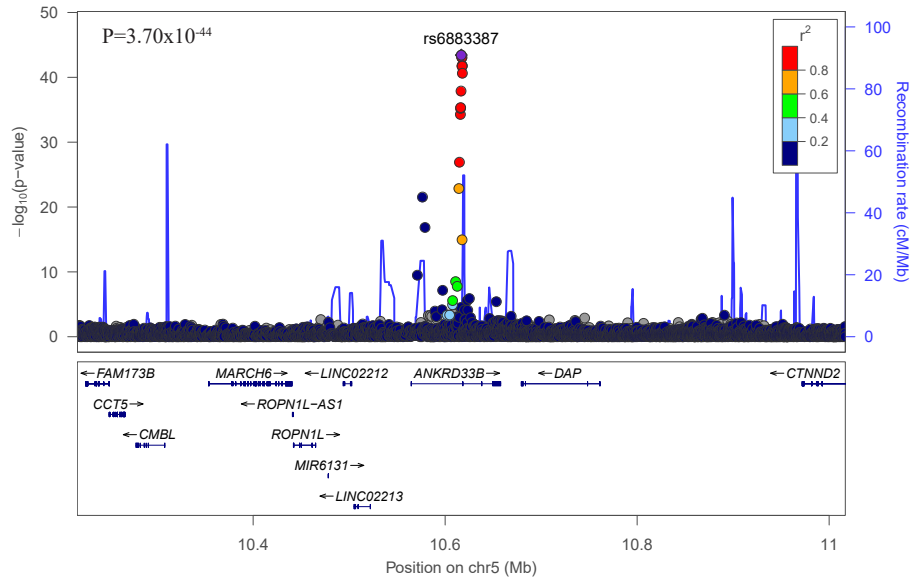

LUAD : ANKRD33B – African

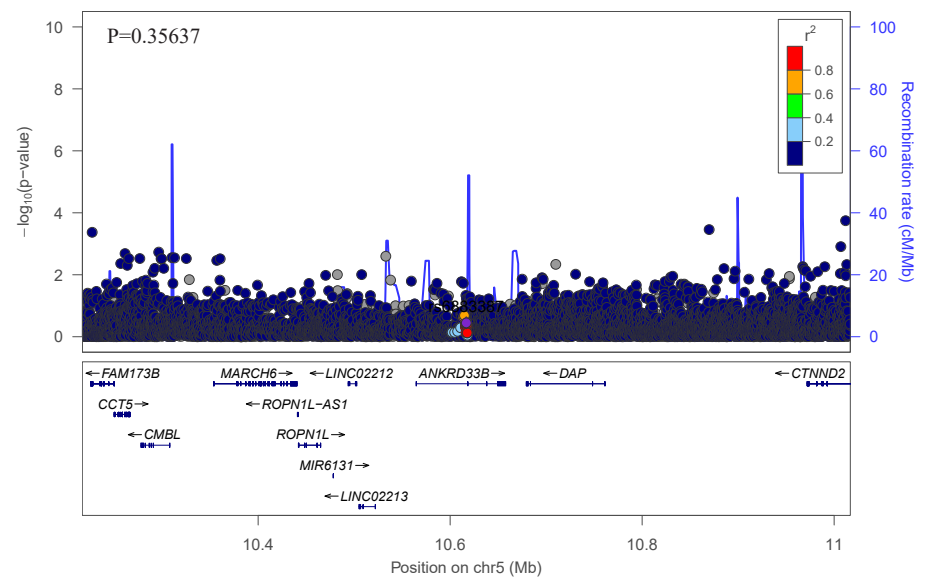

LUAD : YTHDC2\_KCNN2 – Combined

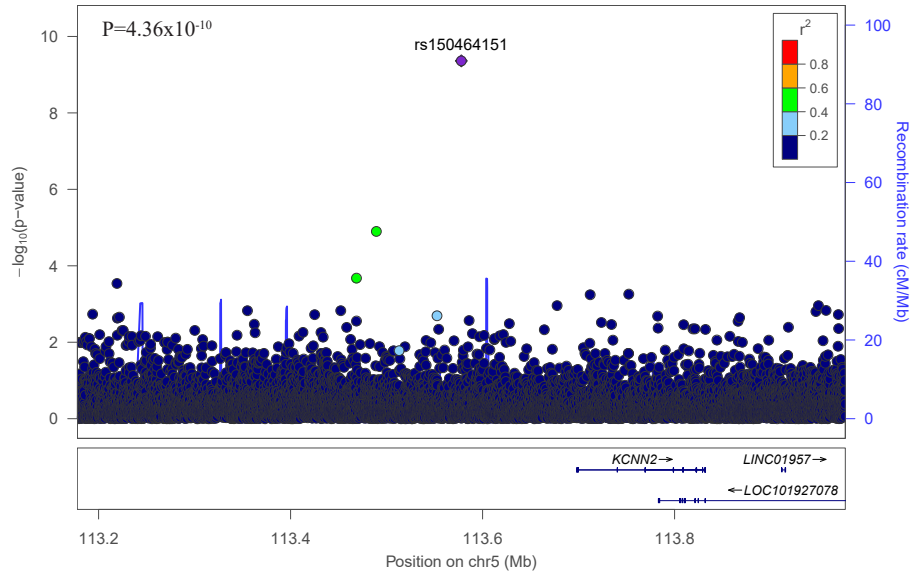

LUAD : YTHDC2\_KCNN2 – European

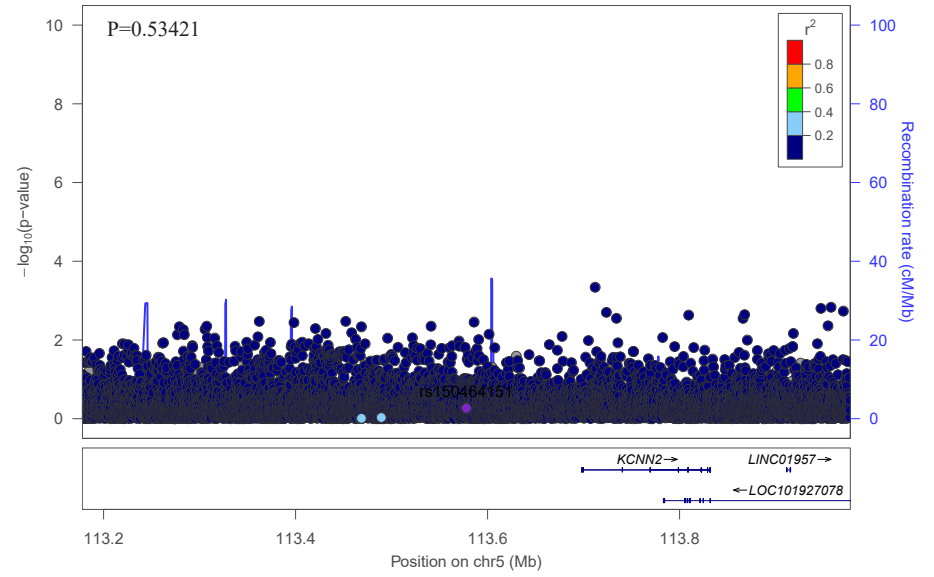

LUAD : YTHDC2\_KCNN2 – Asian

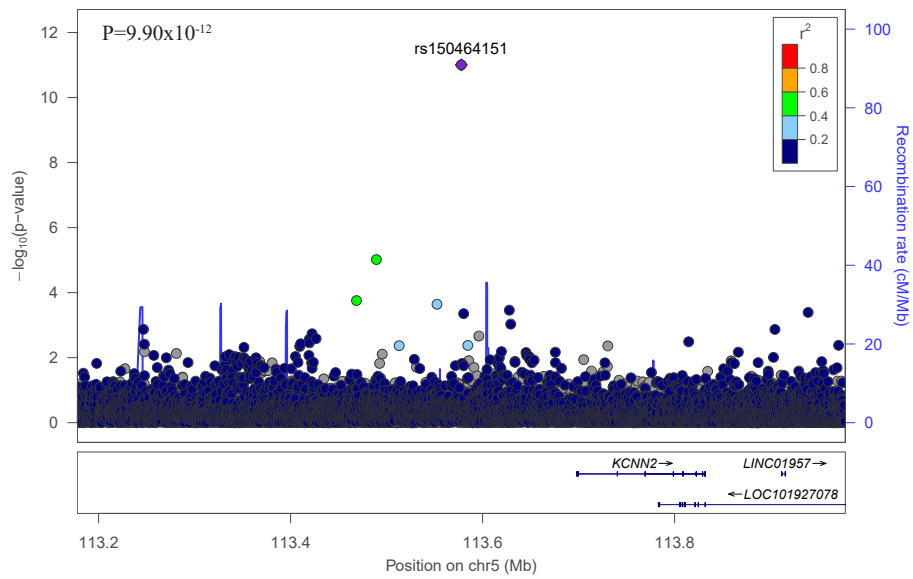

LUAD : YTHDC2\_KCNN2 – African

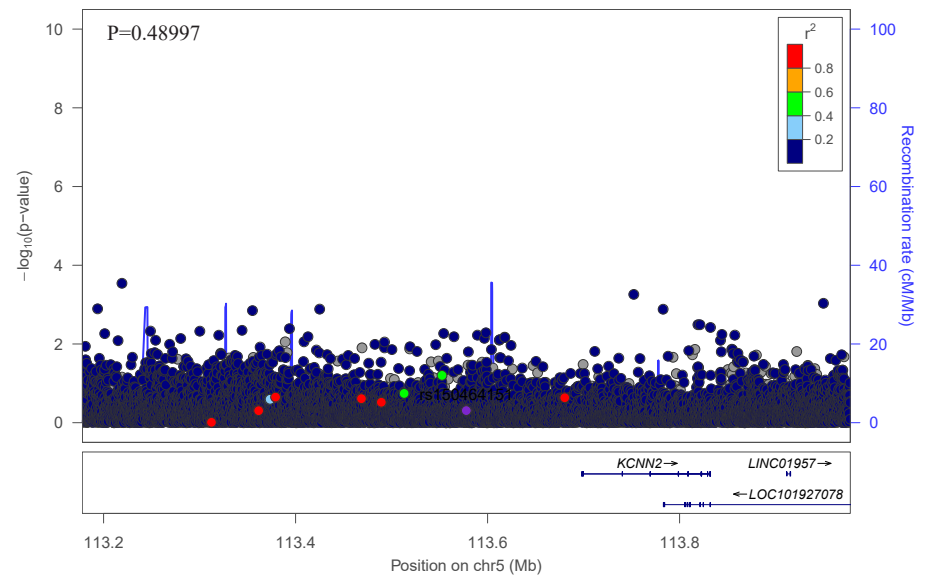

LUAD : RBM22\_DCTN4 – Combined

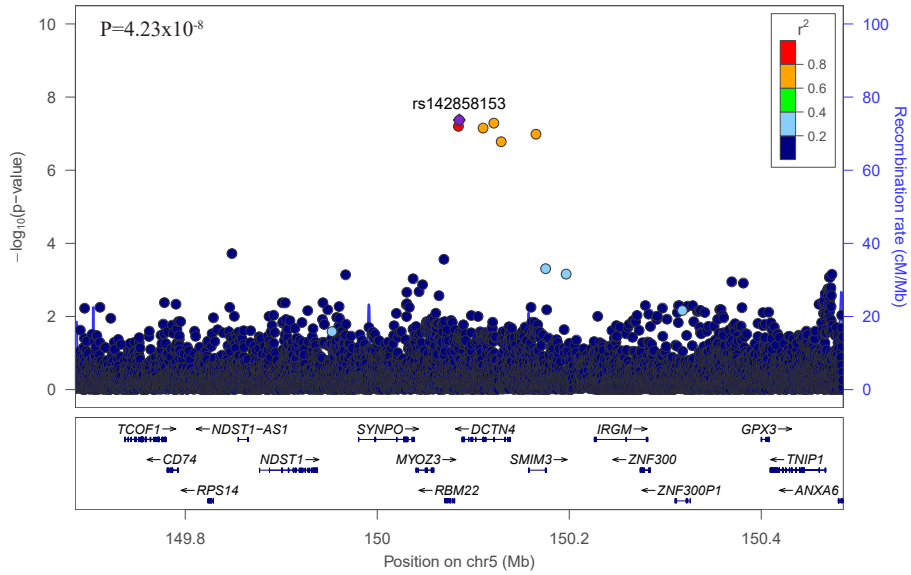

LUAD : RBM22\_DCTN4 – European

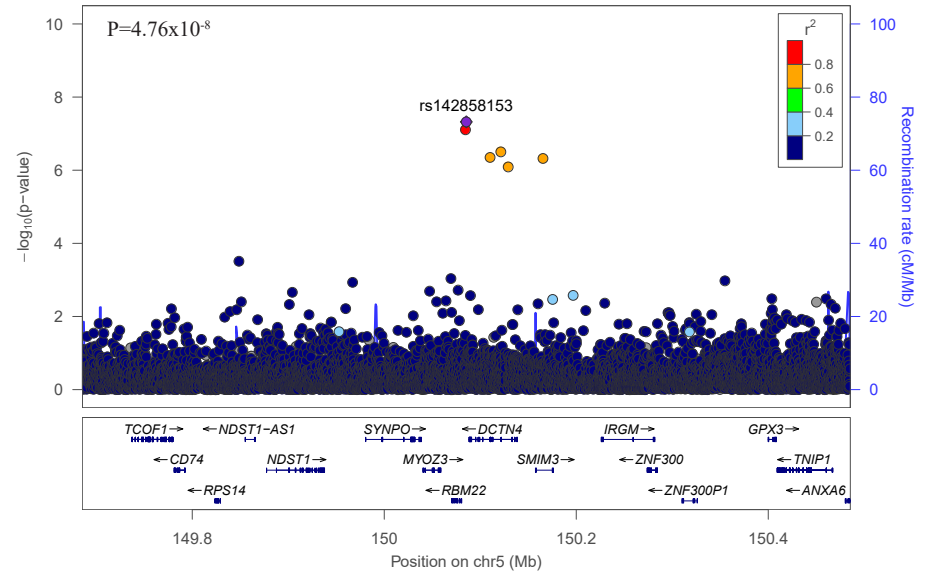

LUAD : RBM22\_DCTN4 – Asian

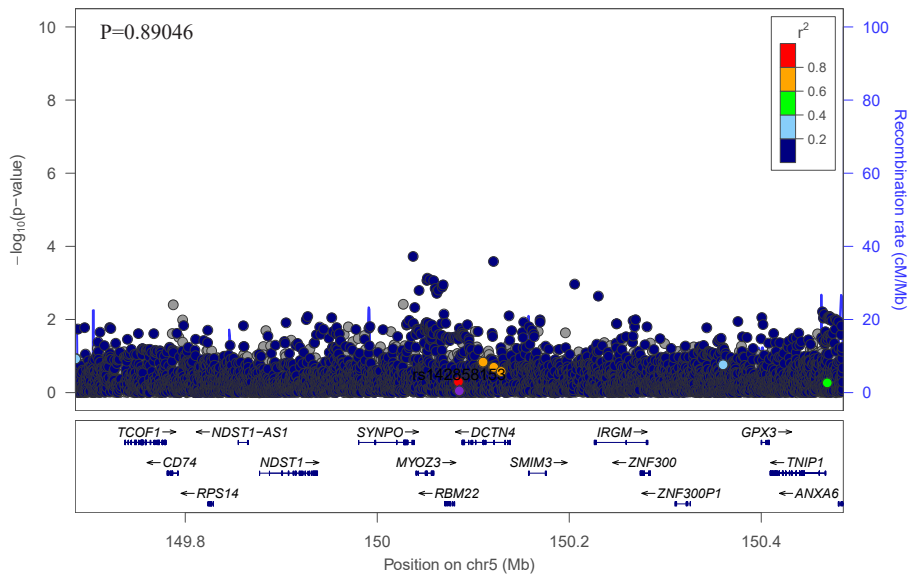

LUAD : RBM22\_DCTN4 – African

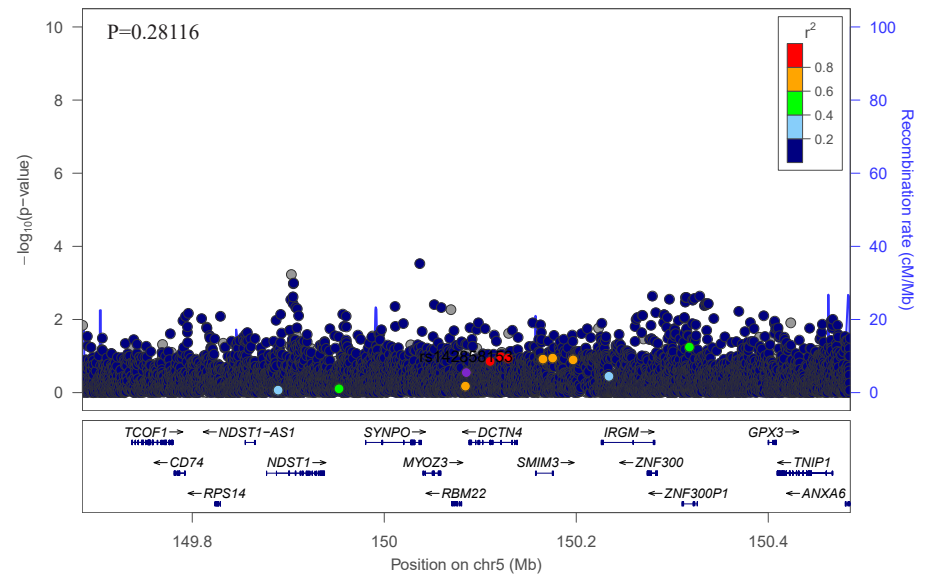

LUAD : IRF4 – Combined

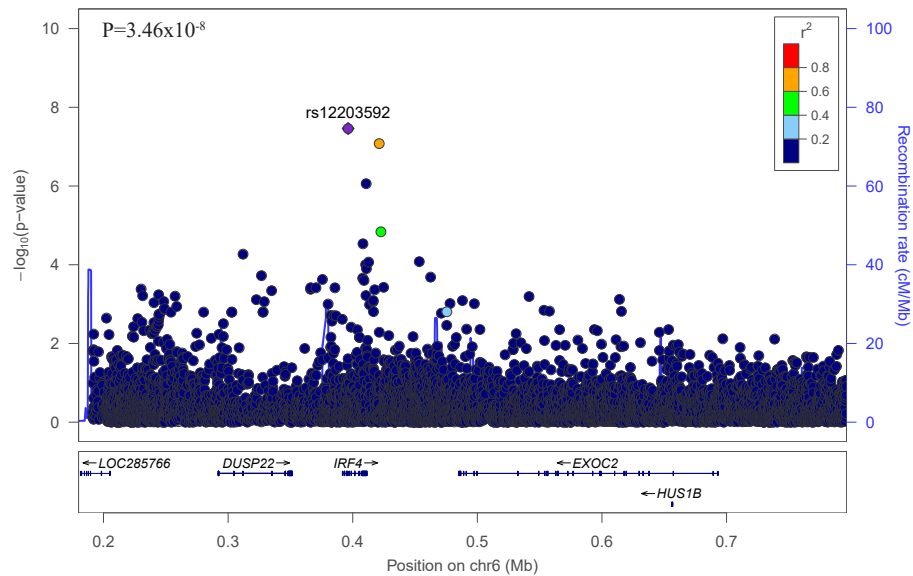

LUAD : IRF4 – European

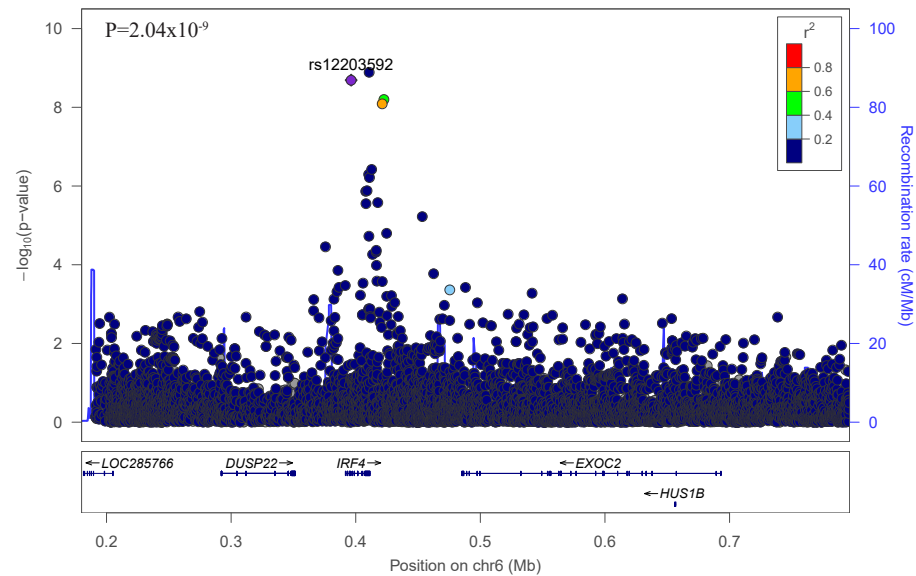

LUAD : IRF4 – Asian

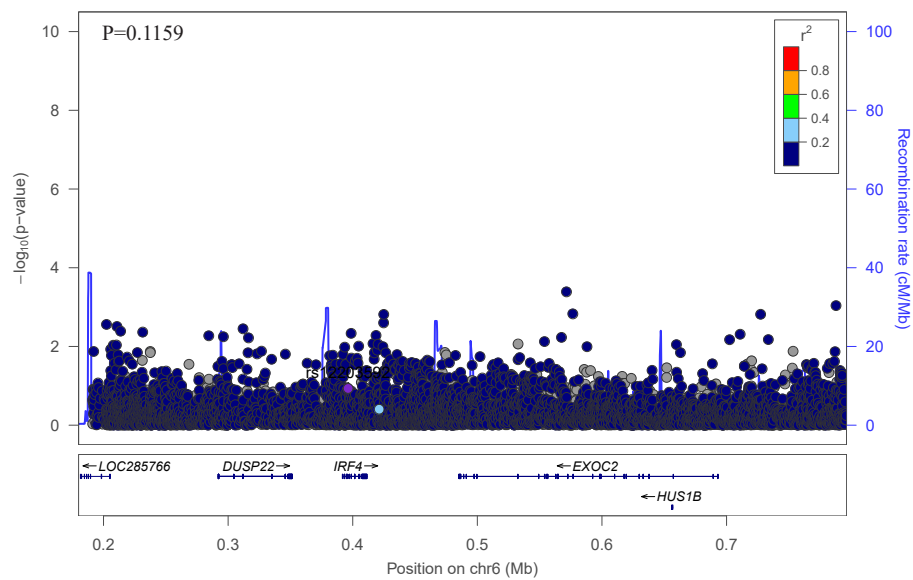

LUAD : IRF4 – African

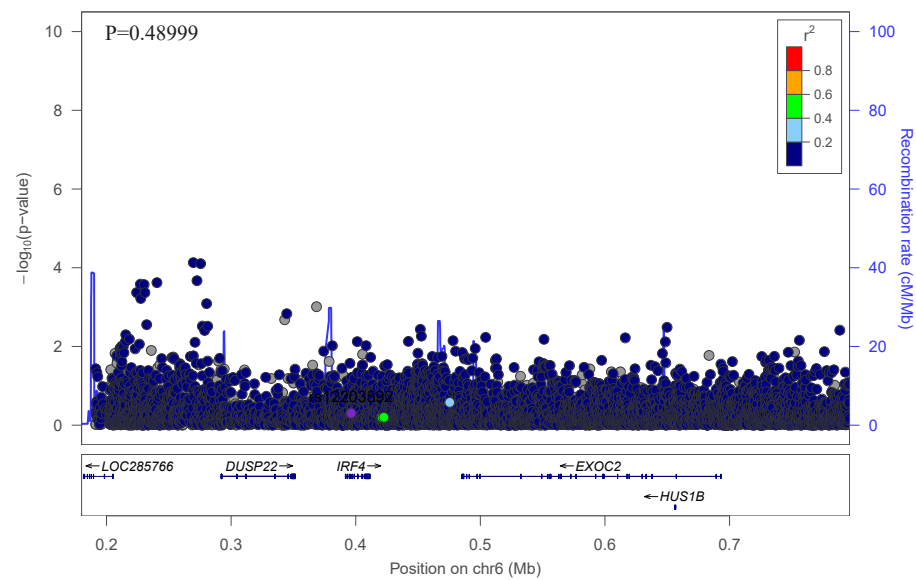

LUAD : LOC101929163\_HLA-DRA – Combined

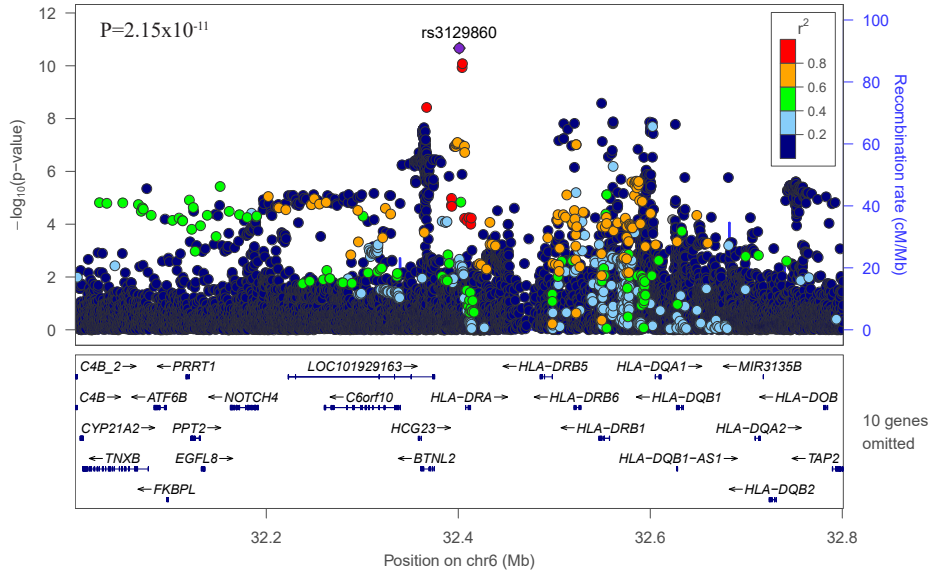

LUAD : LOC101929163\_HLA-DRA – European

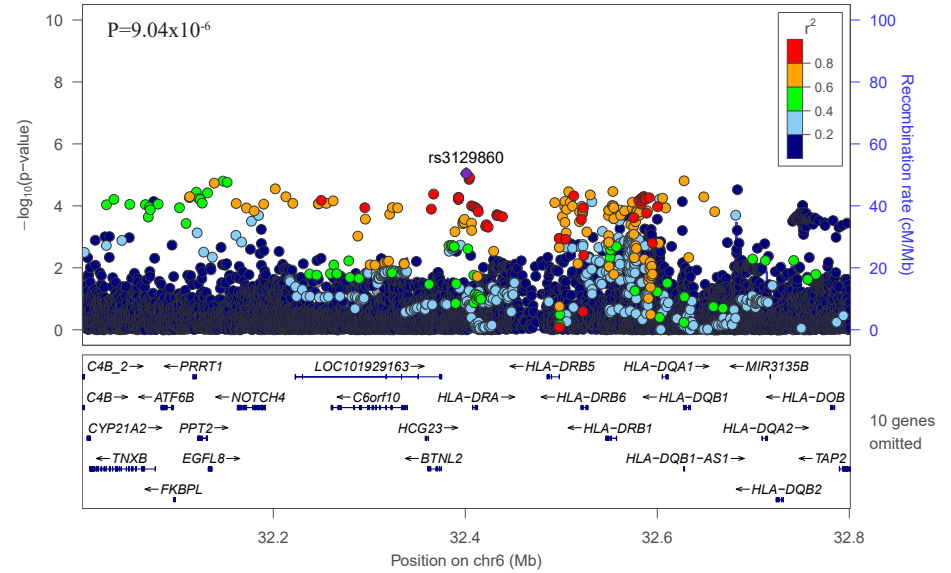

LUAD : LOC101929163\_HLA-DRA – Asian

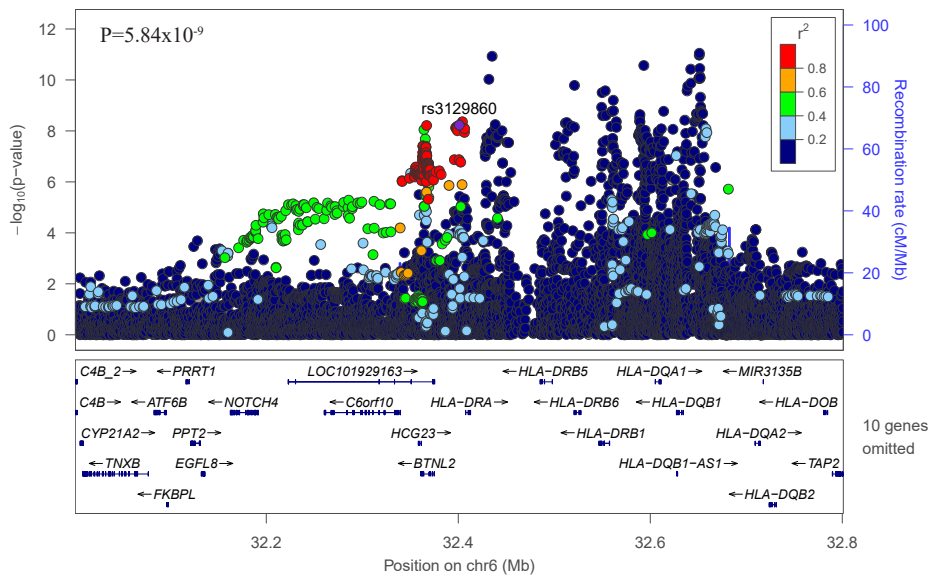

LUAD : LOC101929163\_HLA-DRA – African

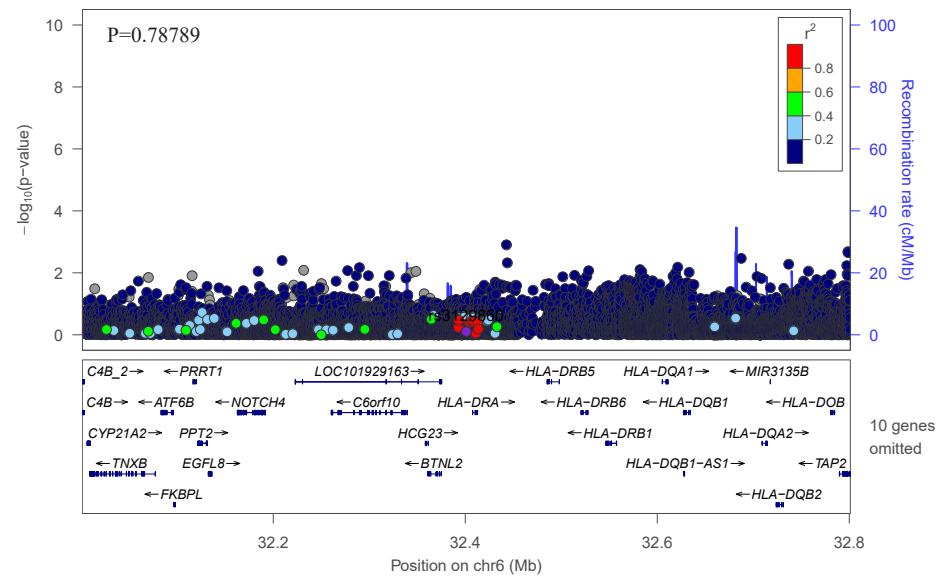

LUAD : MIR31HG\_MTAP – Combined

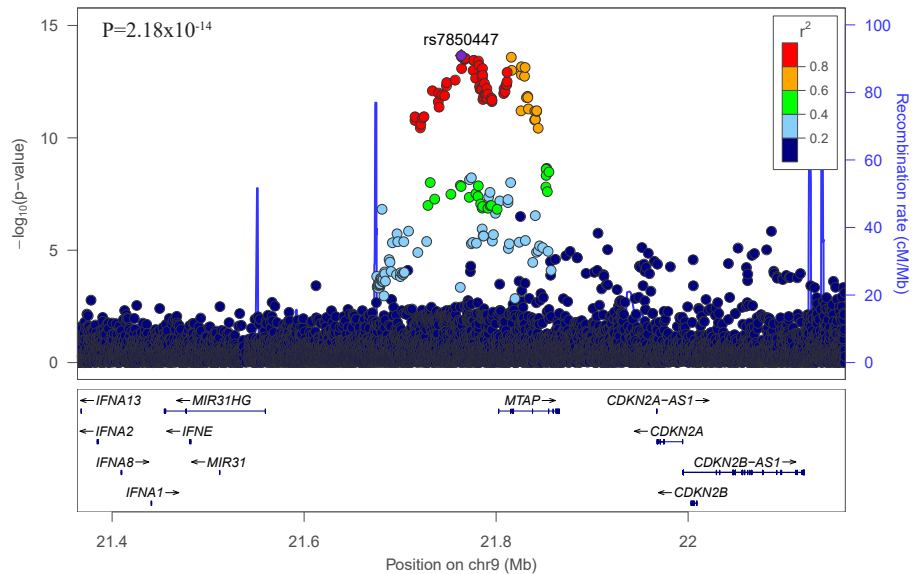

LUAD : MIR31HG\_MTAP – European

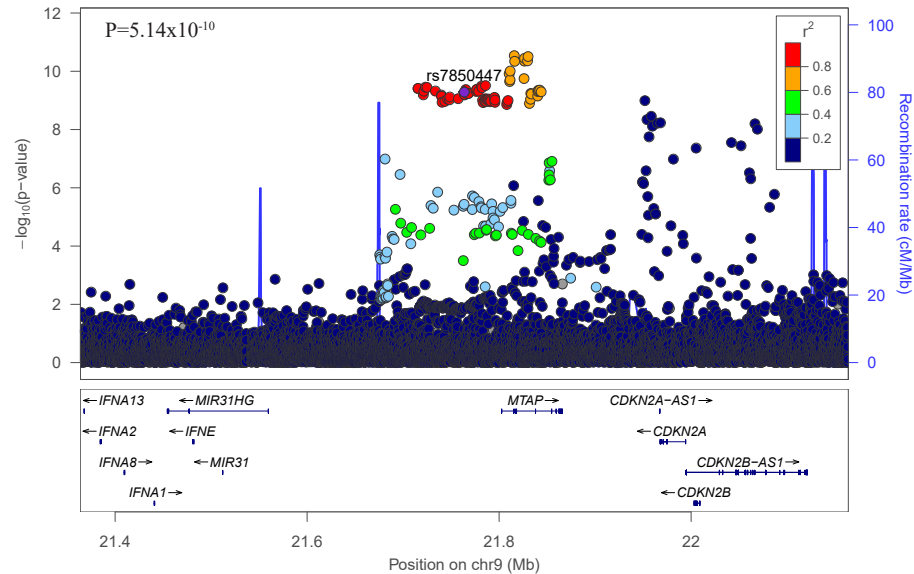

LUAD : MIR31HG\_MTAP – Asian

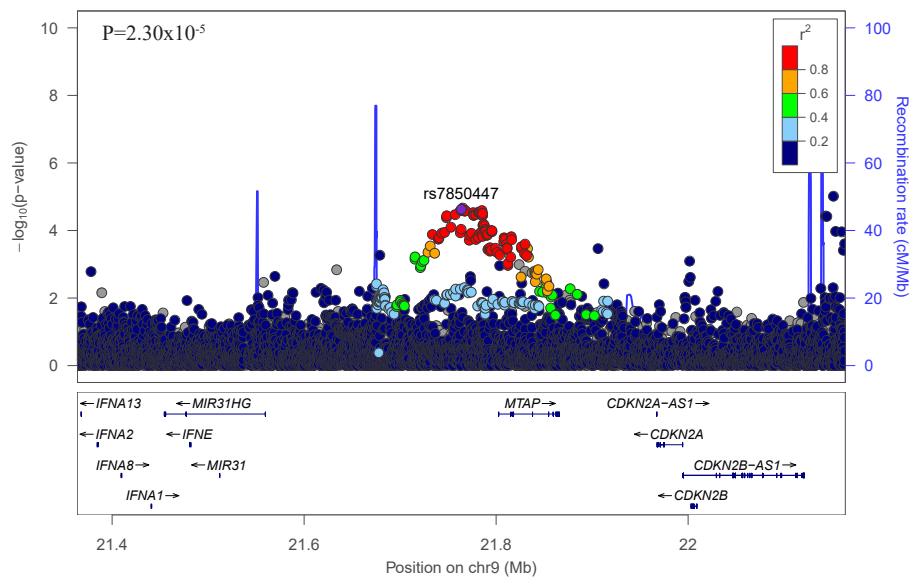

LUAD : MIR31HG\_MTAP – African

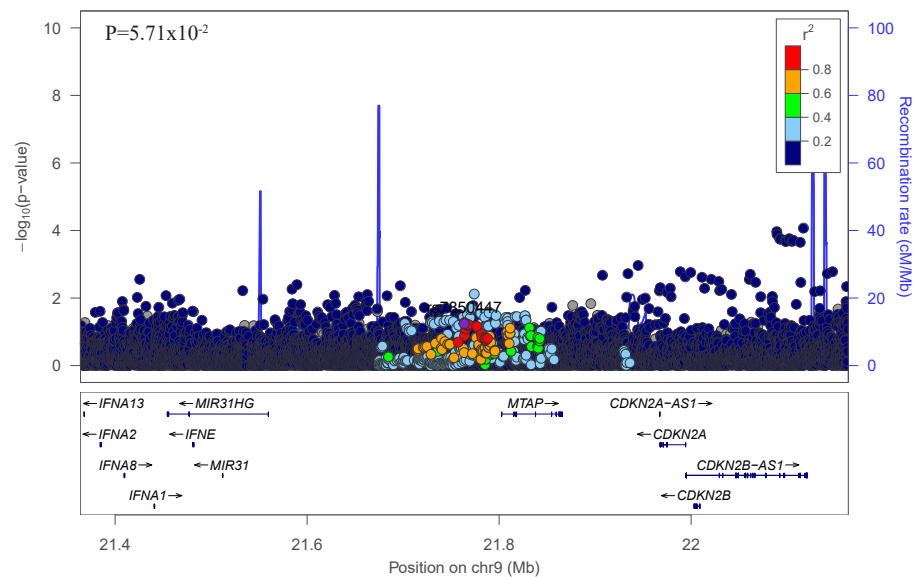



LUAD : ATM – Combined

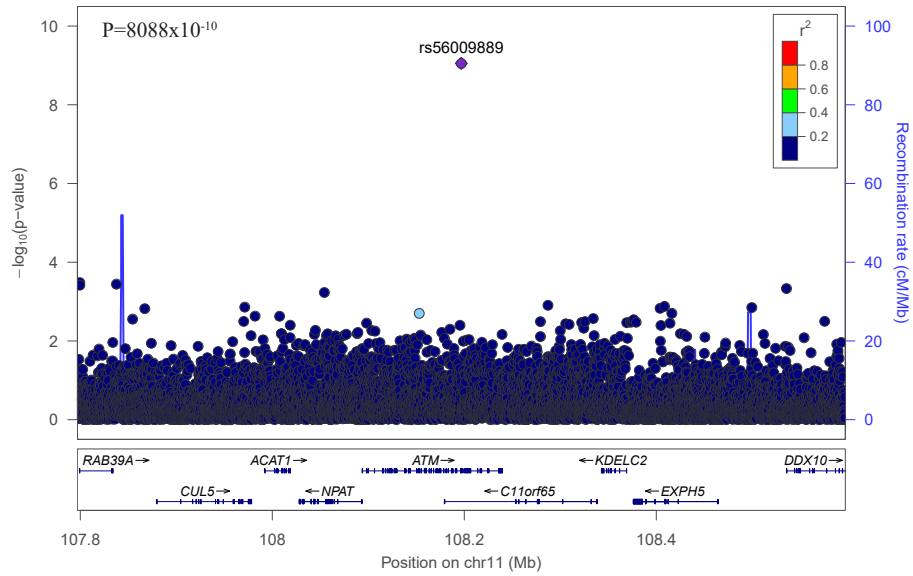

LUAD : ATM – European

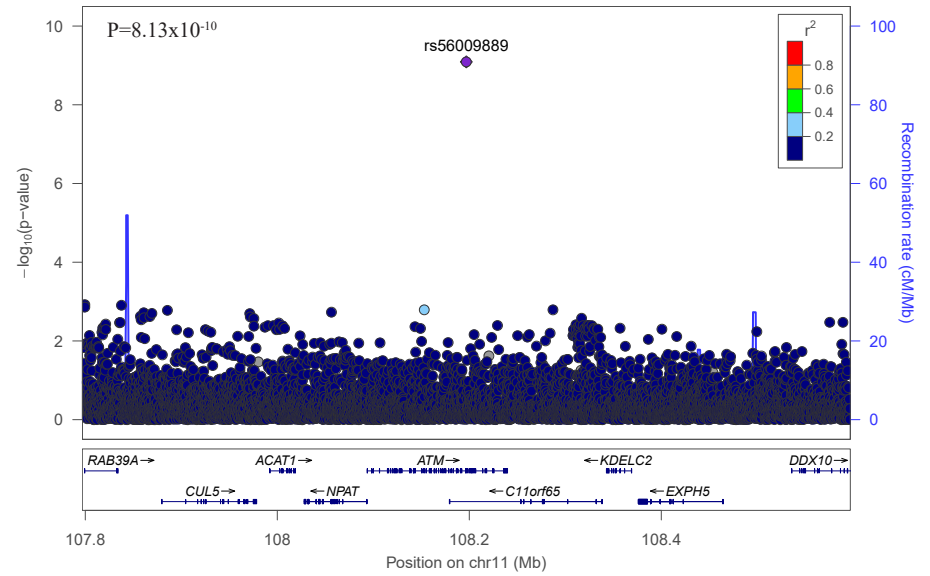

LUAD : ATM – Asian

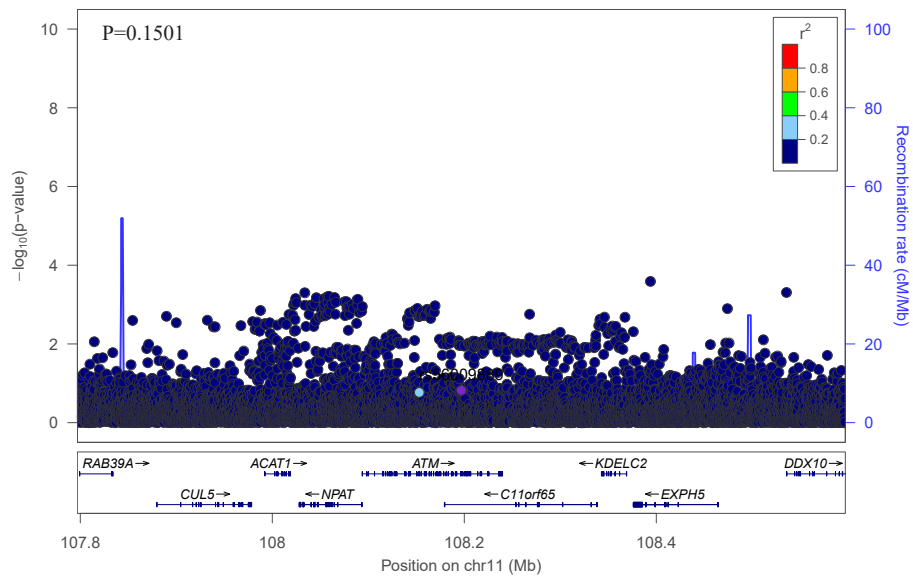

LUAD : ATM – African

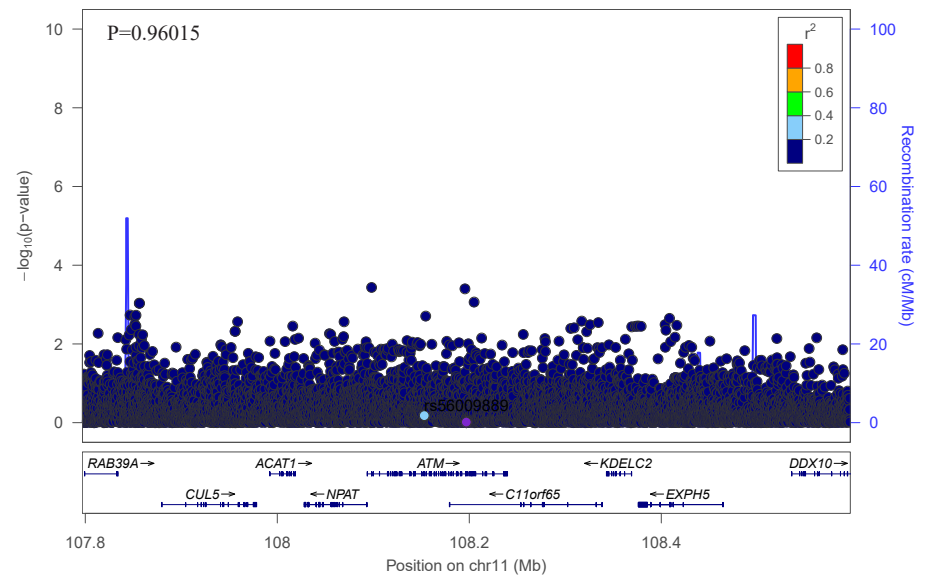

LUAD : LINC01395\_TMEM45B – Combined

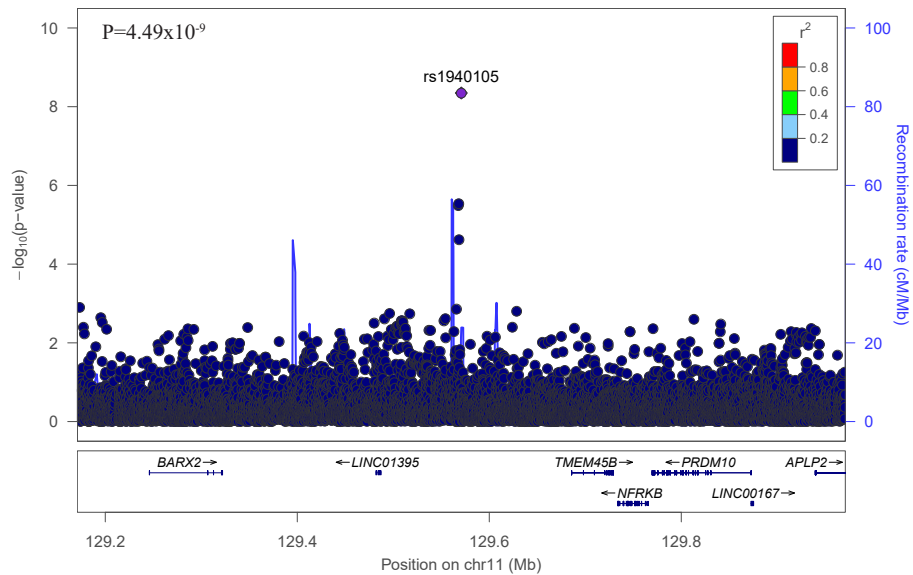

LUAD : LINC01395\_TMEM45B – European

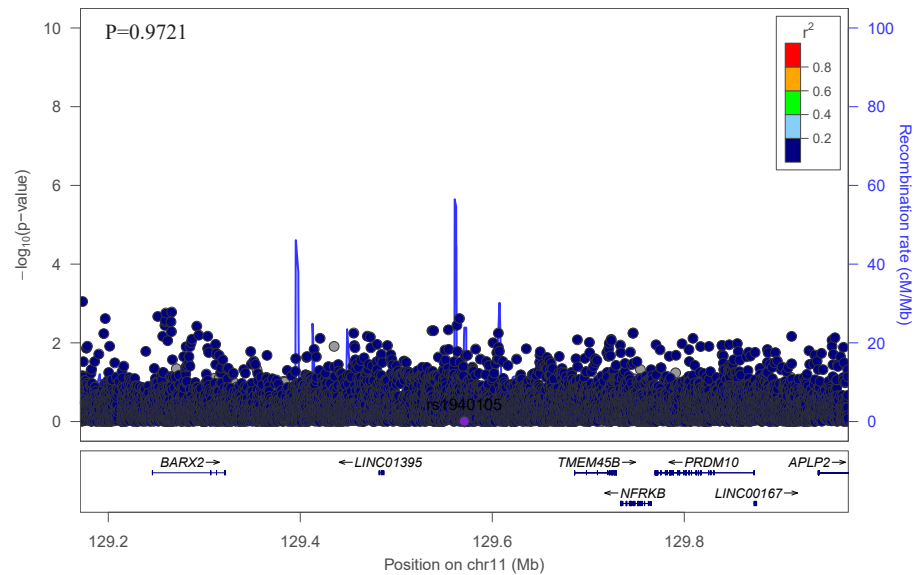

LUAD : LINC01395\_TMEM45B – Asian

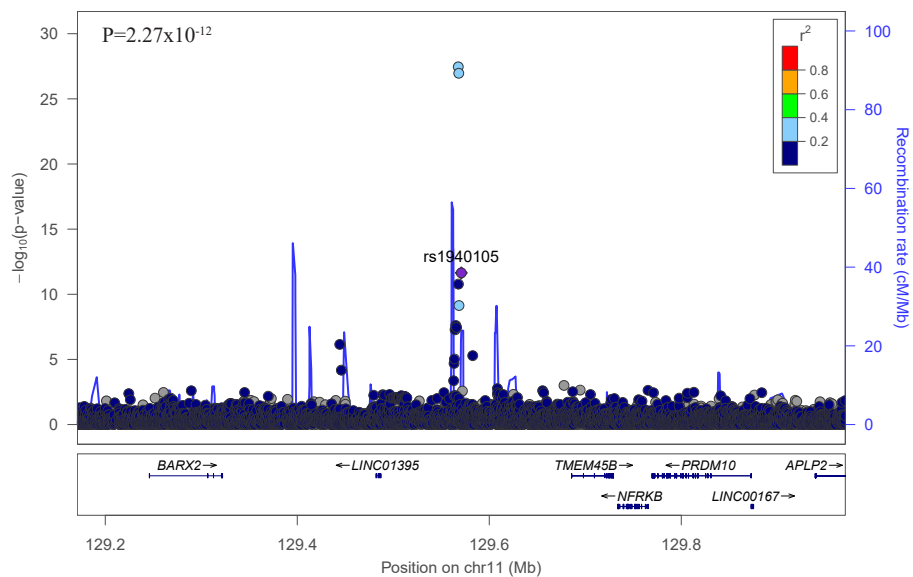

LUAD : LINC01395\_TMEM45B – African

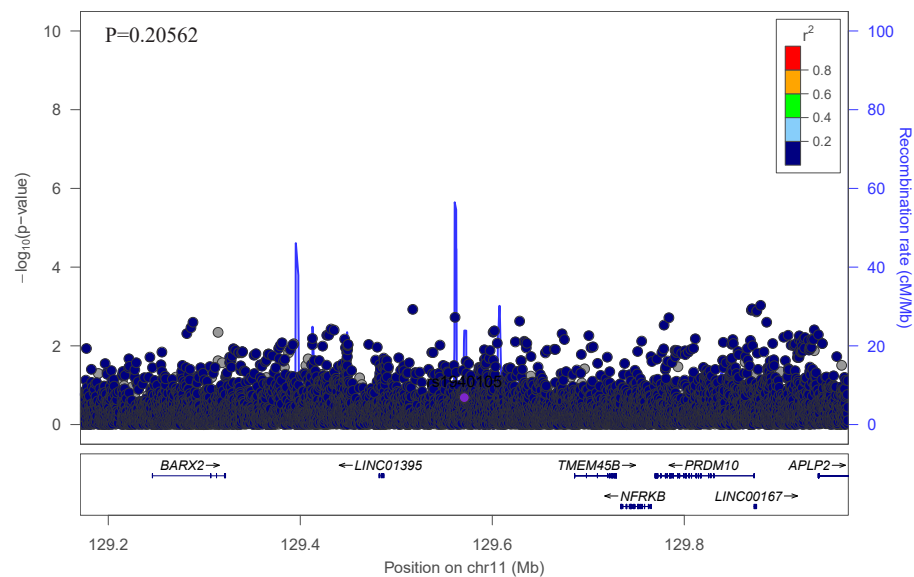

LUAD : TBX3\_MED13L – Combined

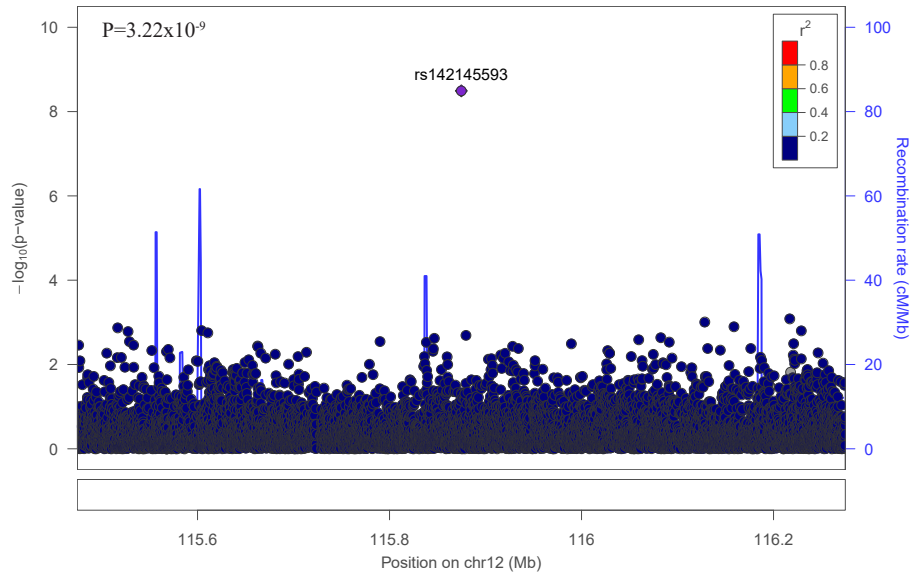

LUAD : TBX3\_MED13L – European

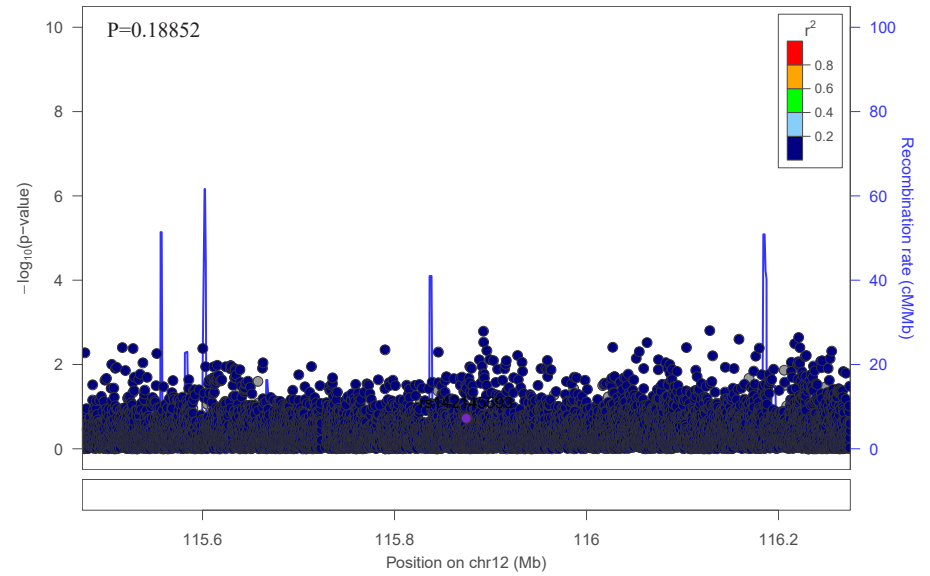

LUAD : TBX3\_MED13L – Asian

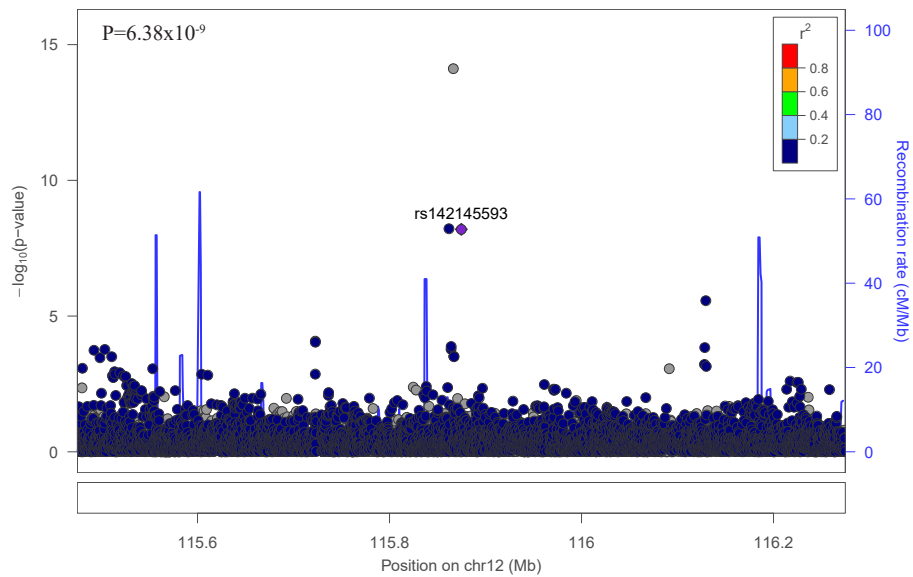

LUAD : TBX3\_MED13L – African

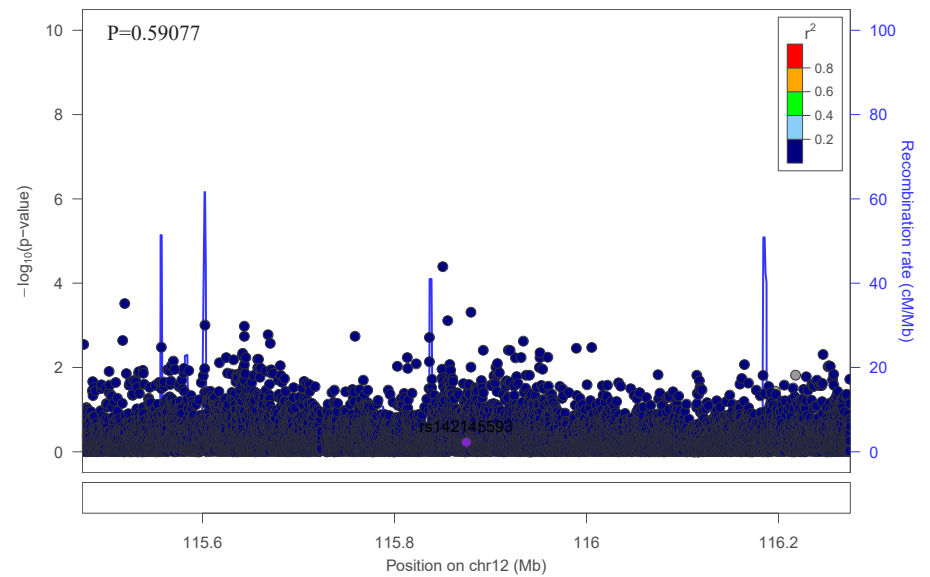

LUAD : BTBD3\_LINC01722 – Combined

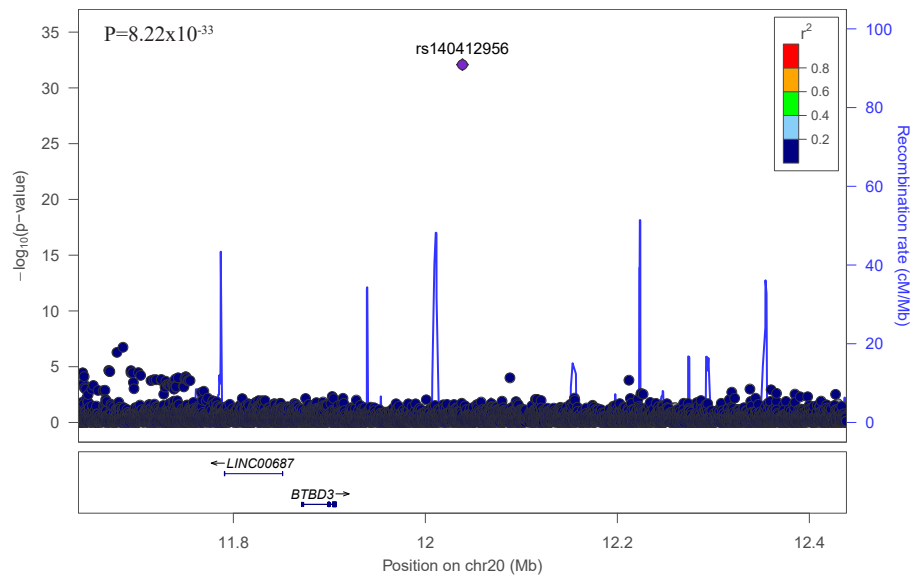

LUAD : BTBD3\_LINC01722 – European

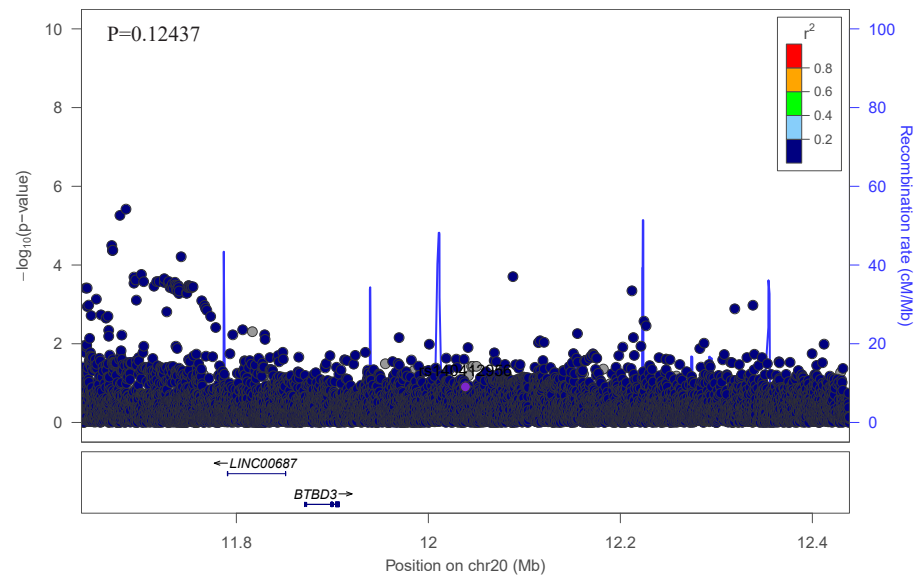

LUAD : BTBD3\_LINC01722 – Asian

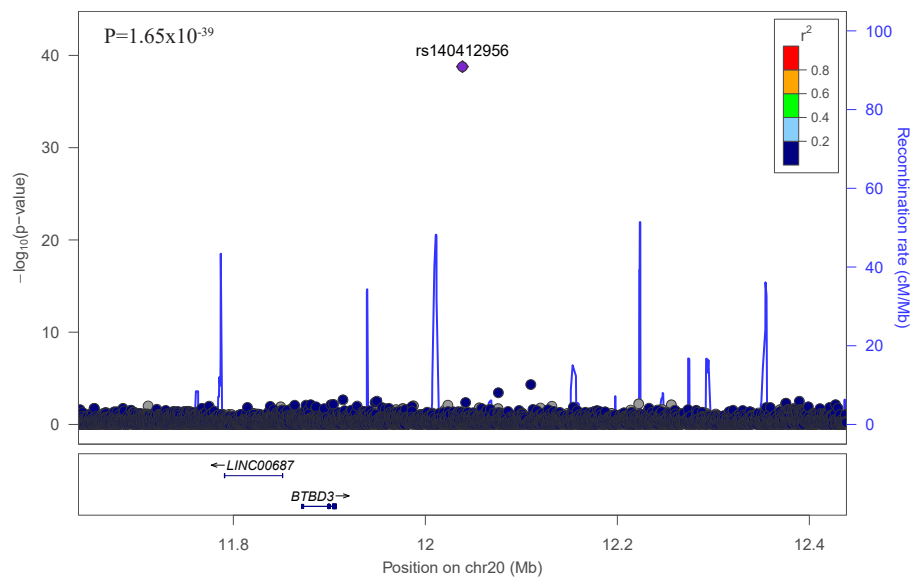

LUAD : BTBD3\_LINC01722 – African

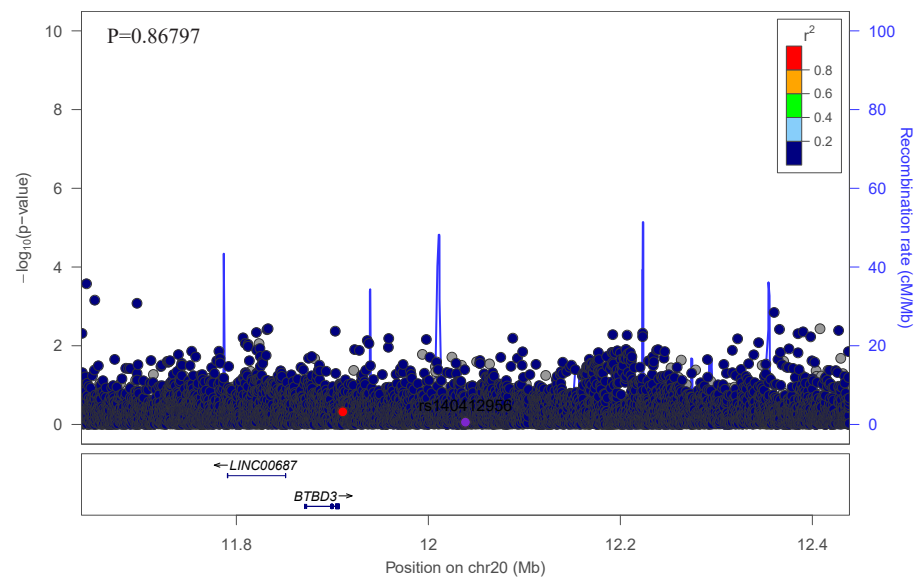

LUAD : RTEL1-TNFRSF6B – Combined

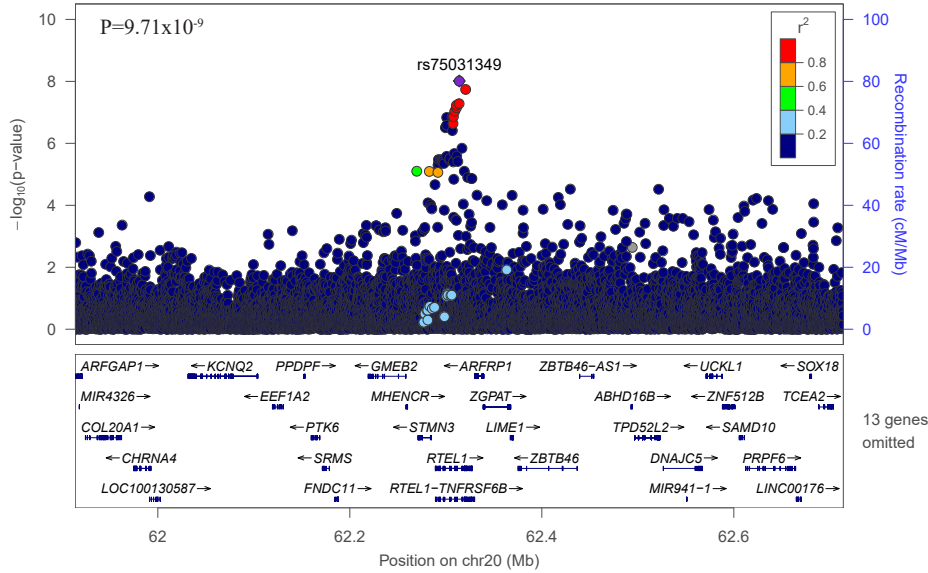

LUAD : RTEL1-TNFRSF6B – European

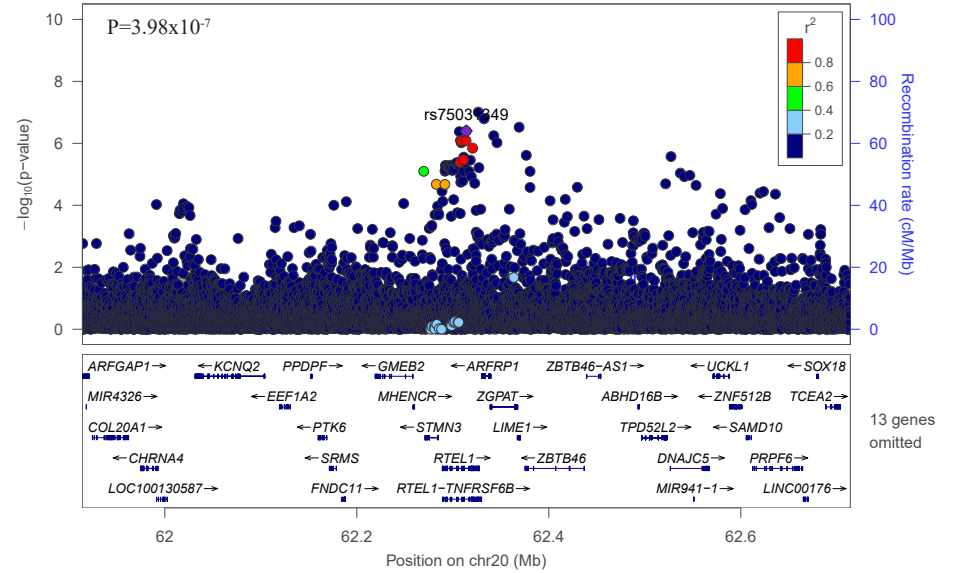

LUAD : RTEL1-TNFRSF6B – Asian

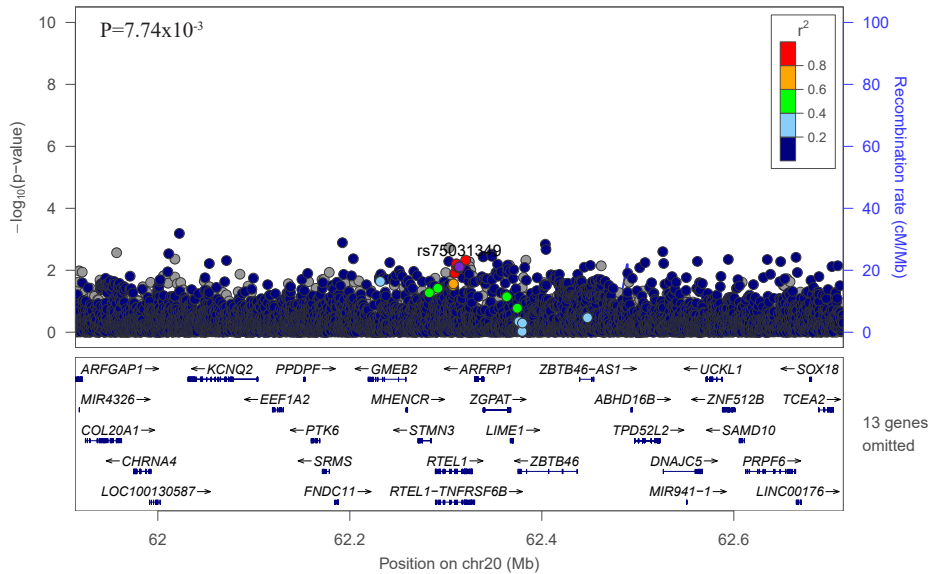

LUAD : RTEL1-TNFRSF6B – African

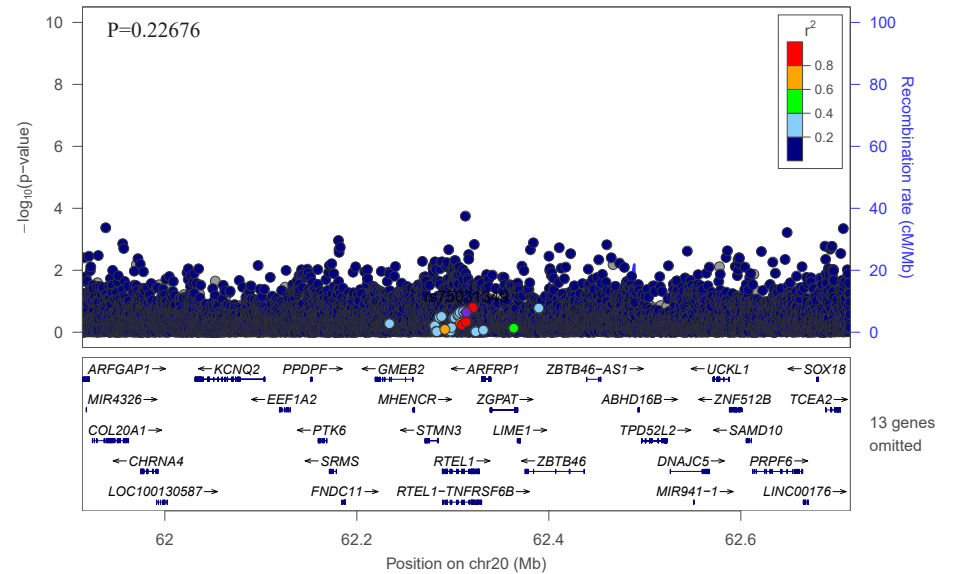

# Squamous Cell Carcinoma

LUSQC : LINC02510\_PCDH18 – Combined

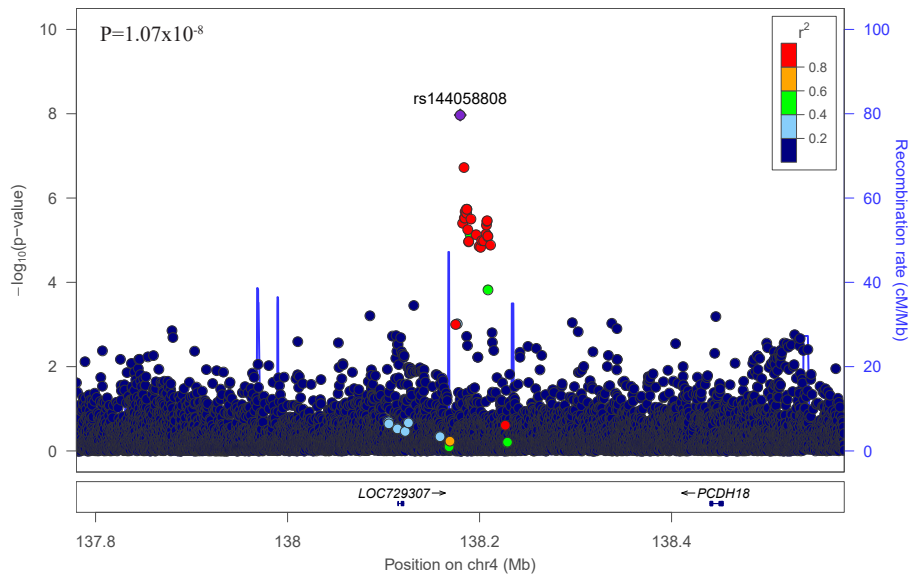

LUSQC : LINC02510\_PCDH18 – European

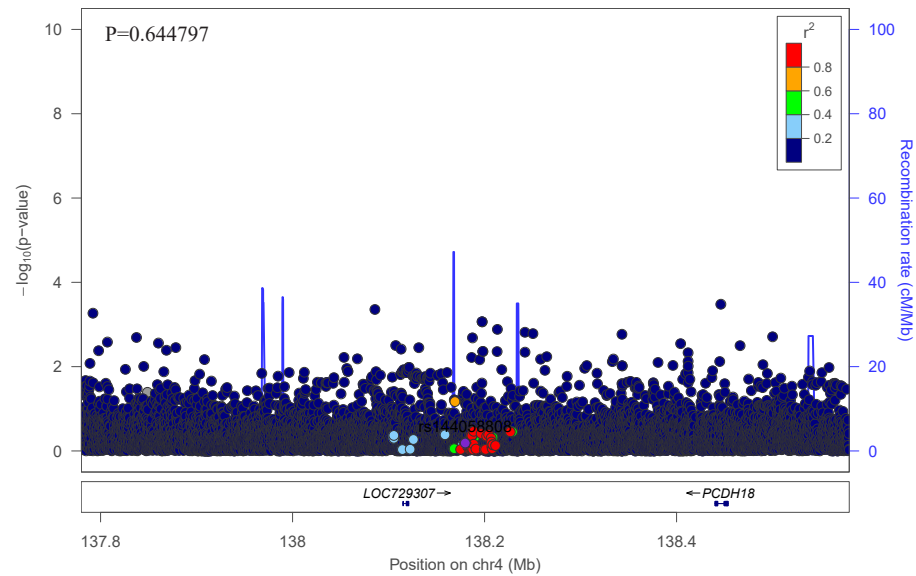

LUSQC : LINC02510\_PCDH18 – Asian

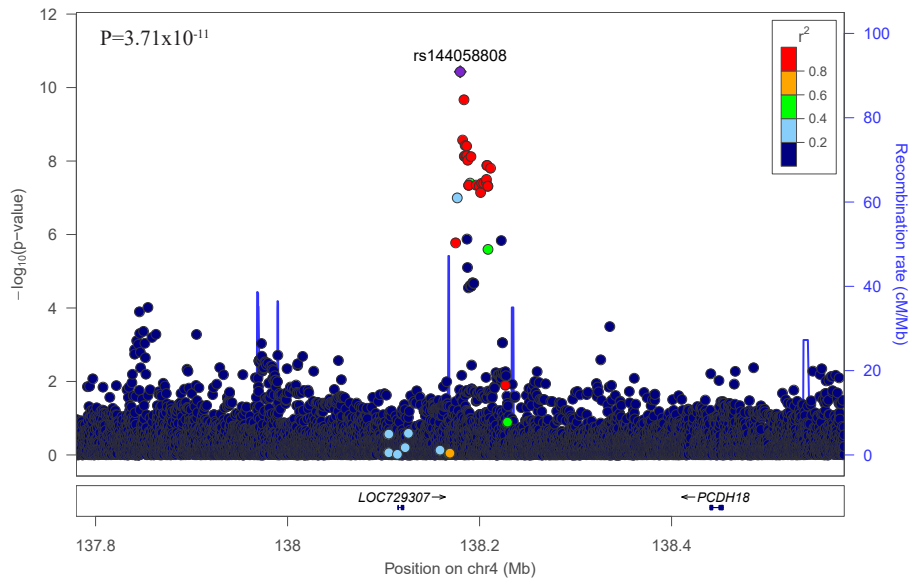

LUSQC : LINC02510\_PCDH18 – African

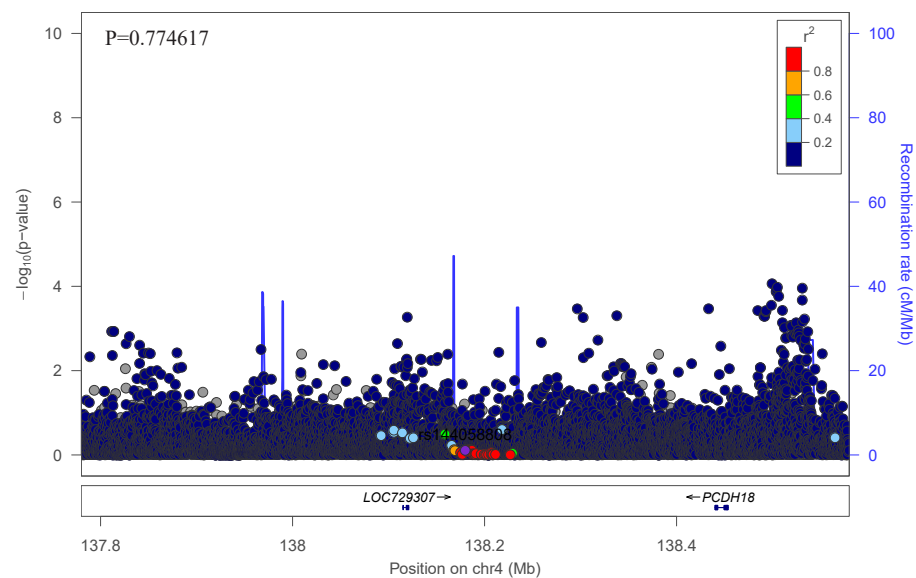

LUSQC : ZFP42\_TRIML2 – Combined

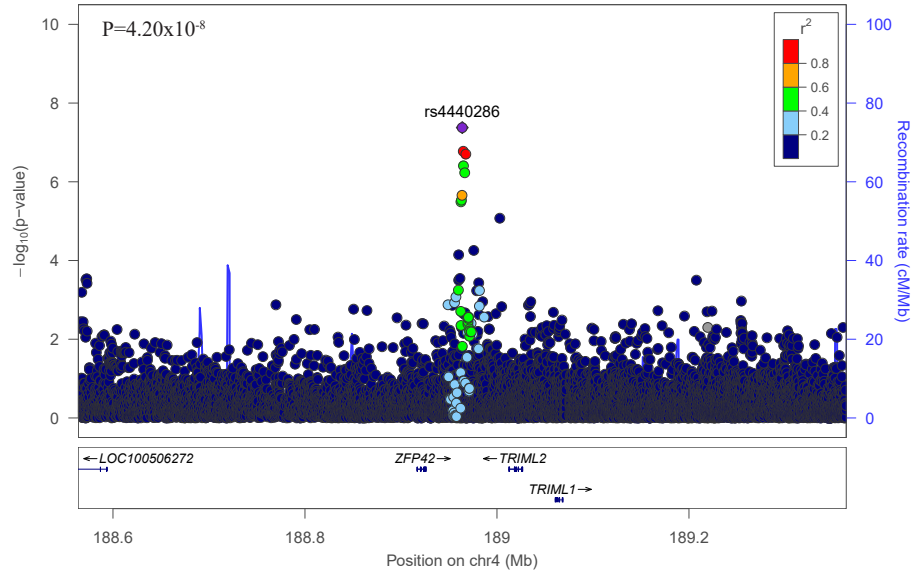

LUSQC : ZFP42\_TRIML2 – European

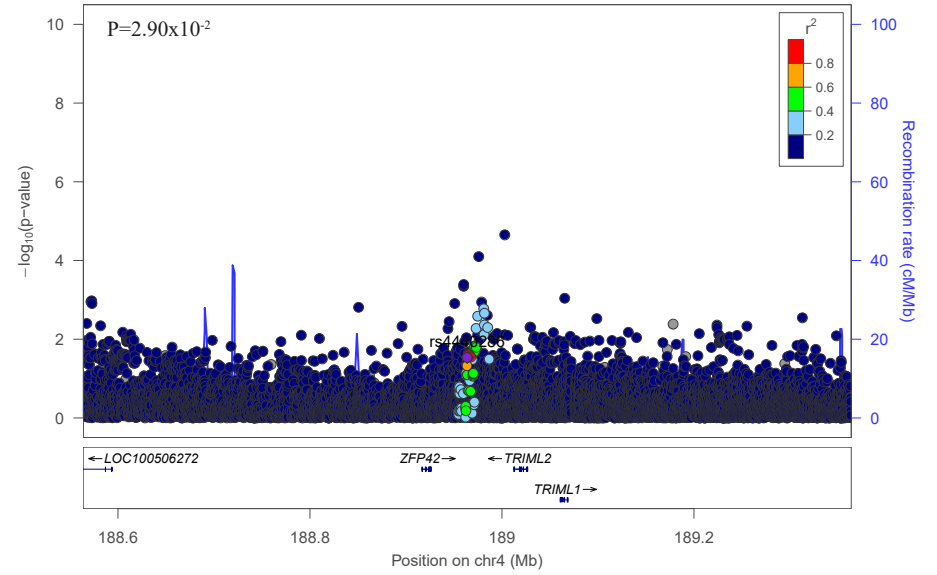

LUSQC : ZFP42\_TRIML2 – Asian

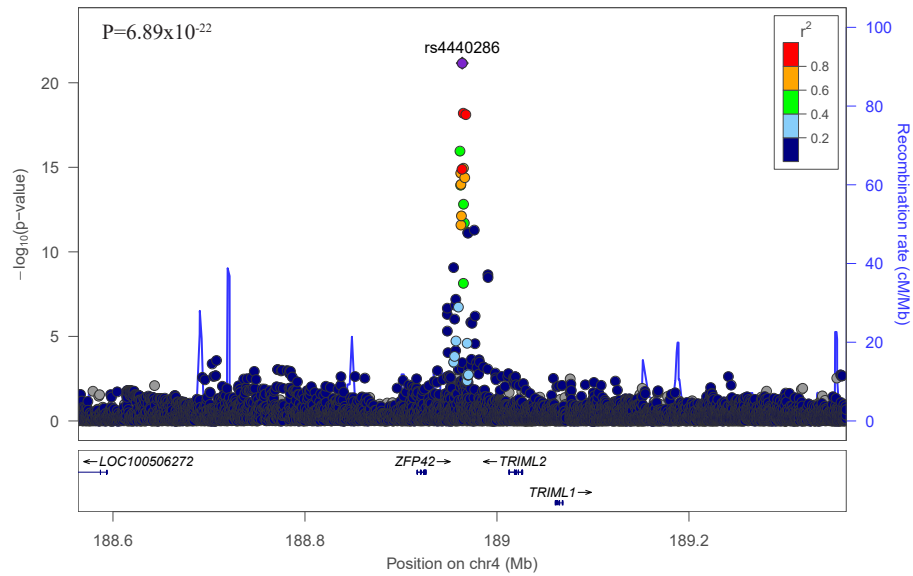

LUSQC : ZFP42\_TRIML2 – African

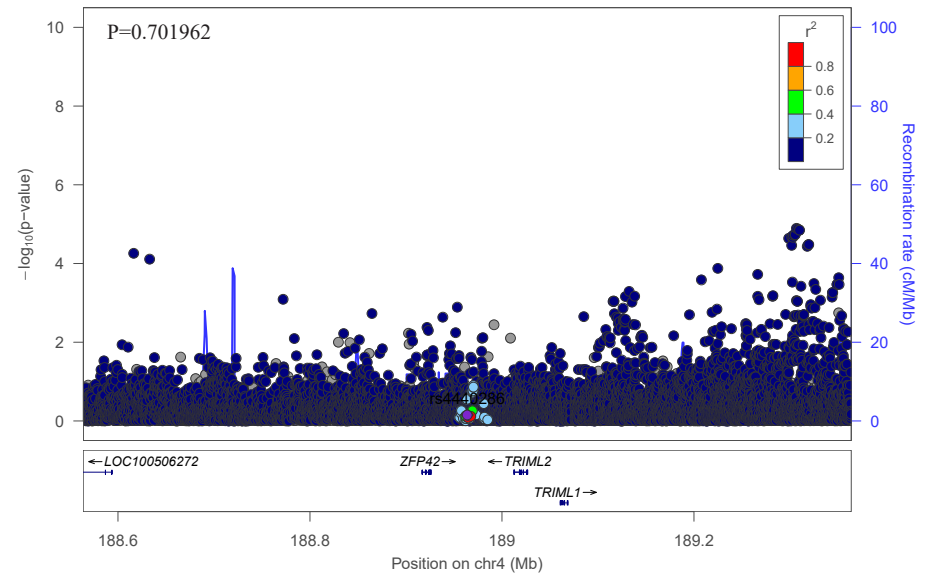



LUSQC : YTHDC2\_KCNN2 – Combined

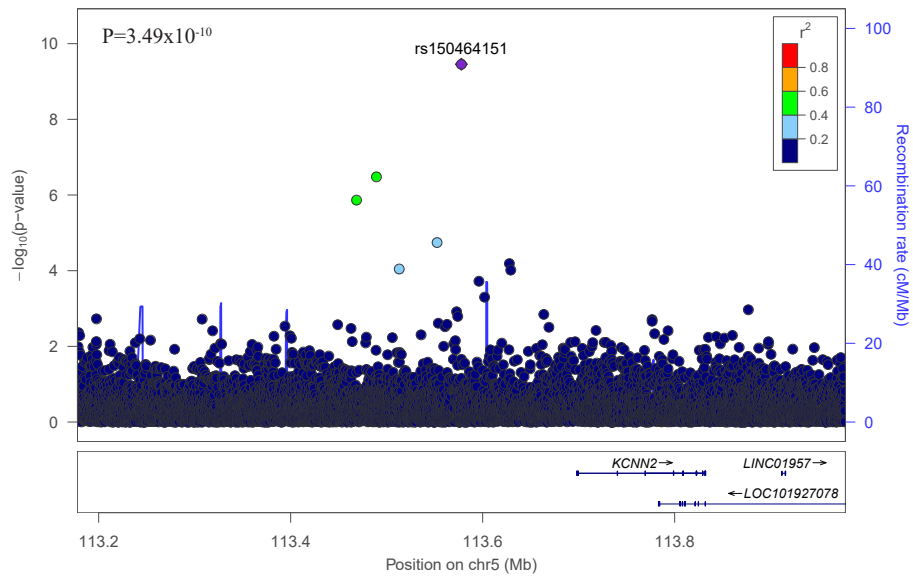

LUSQC : YTHDC2\_KCNN2 – European

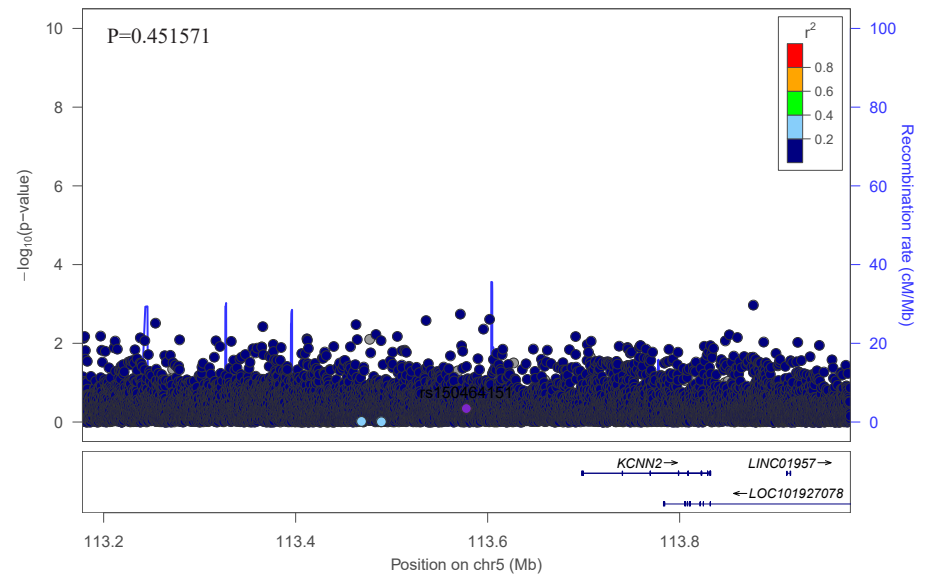

LUSQC : YTHDC2\_KCNN2 – Asian

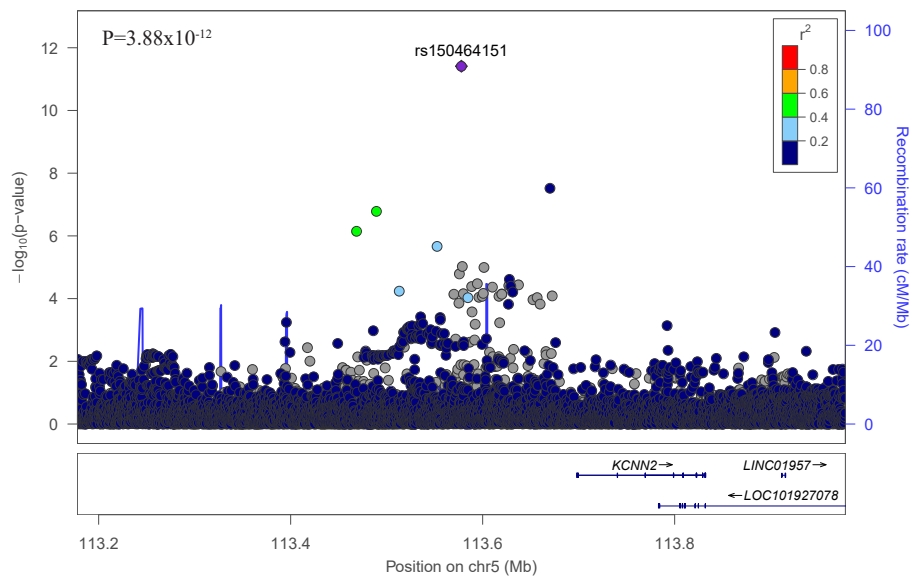

LUSQC : YTHDC2\_KCNN2 – African

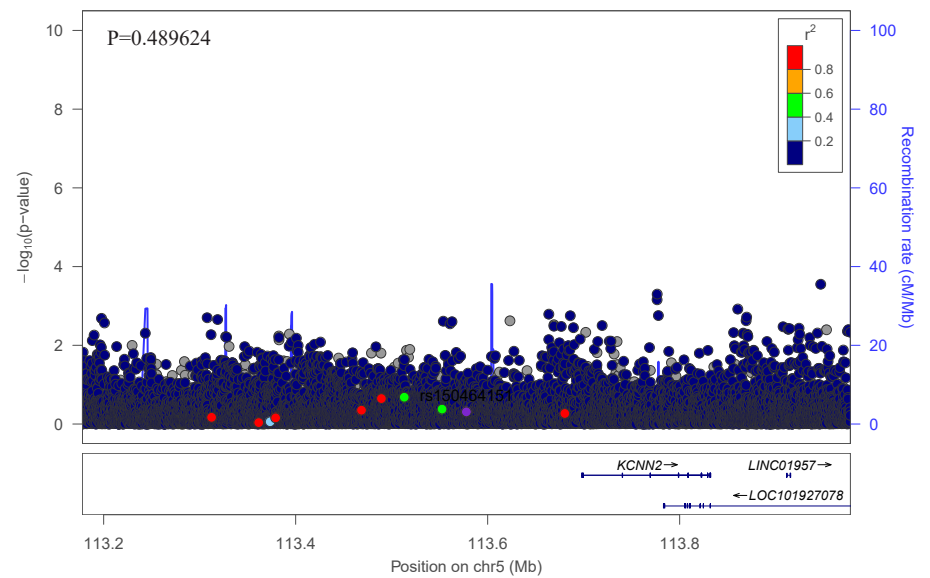

LUSQC : LINC01395\_TMEM45B – Combined

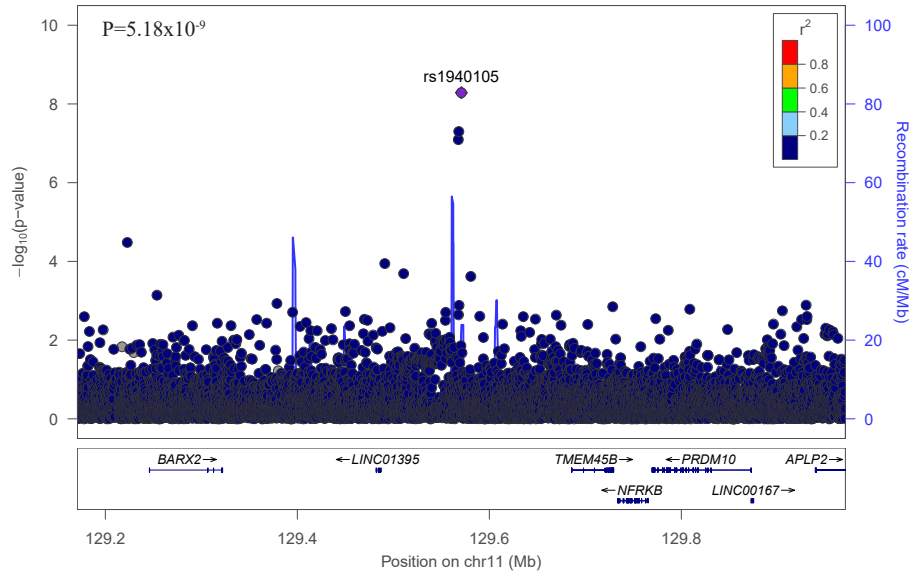

LUSQC : LINC01395\_TMEM45B – European

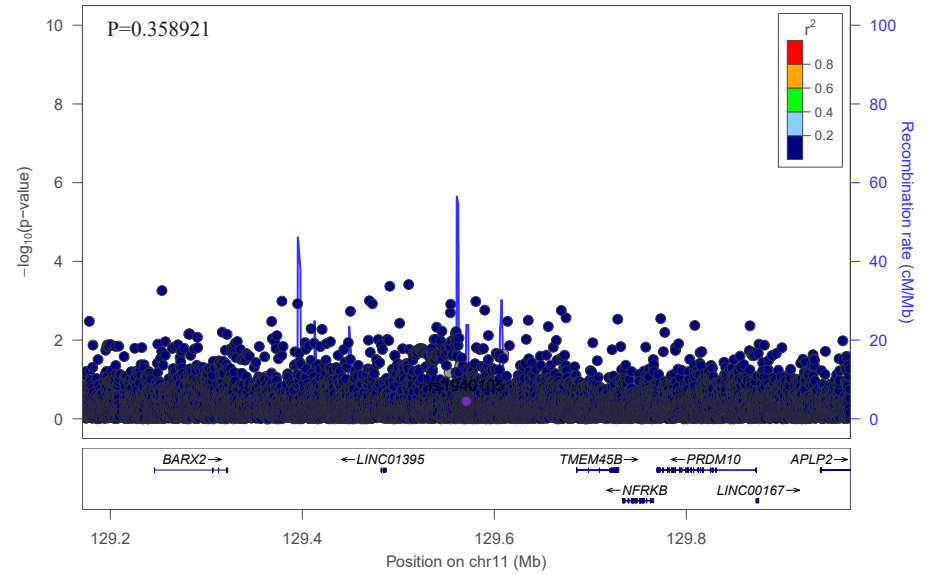

LUSQC : LINC01395\_TMEM45B – Asian

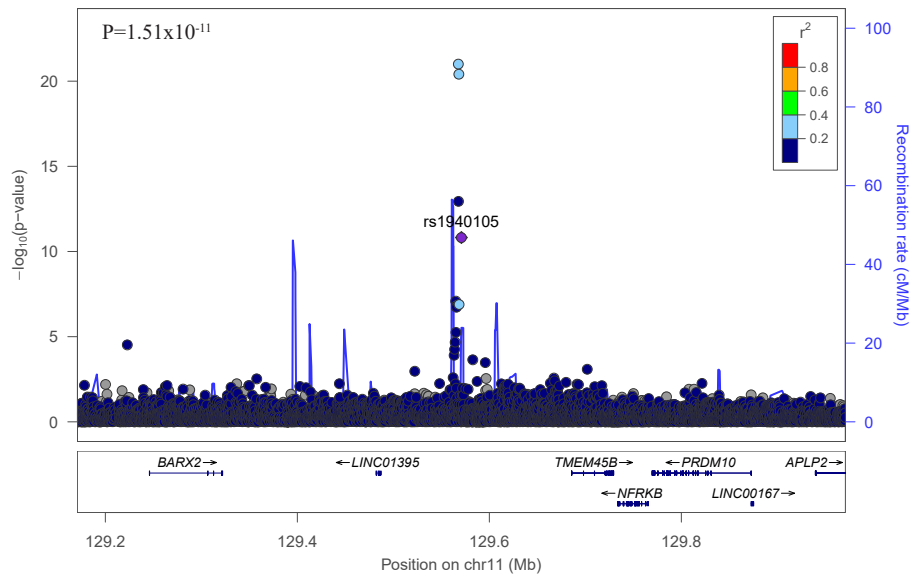

LUSQC : LINC01395\_TMEM45B – African

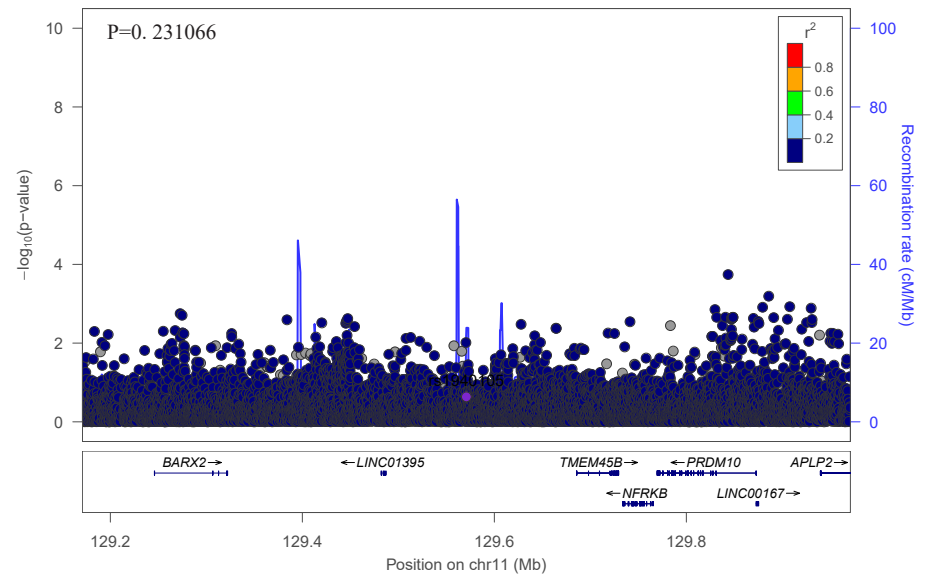

LUSQC : WNK1 – Combined

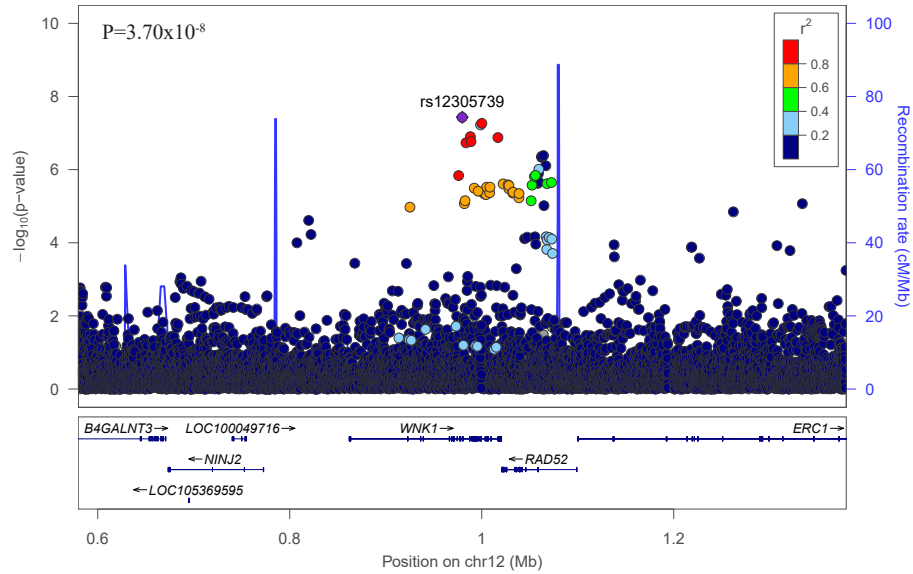

LUSQC : WNK1 – European

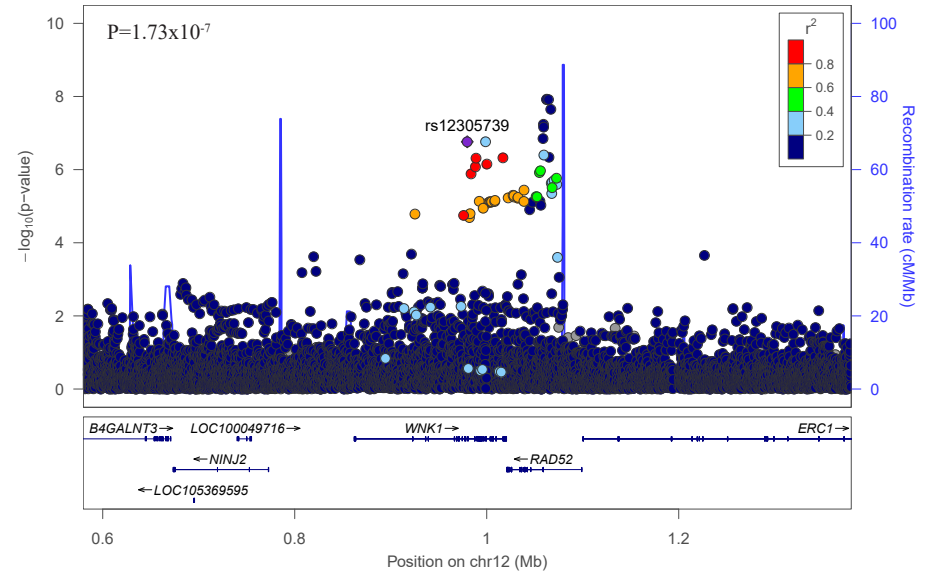

LUSQC : WNK1 – Asian

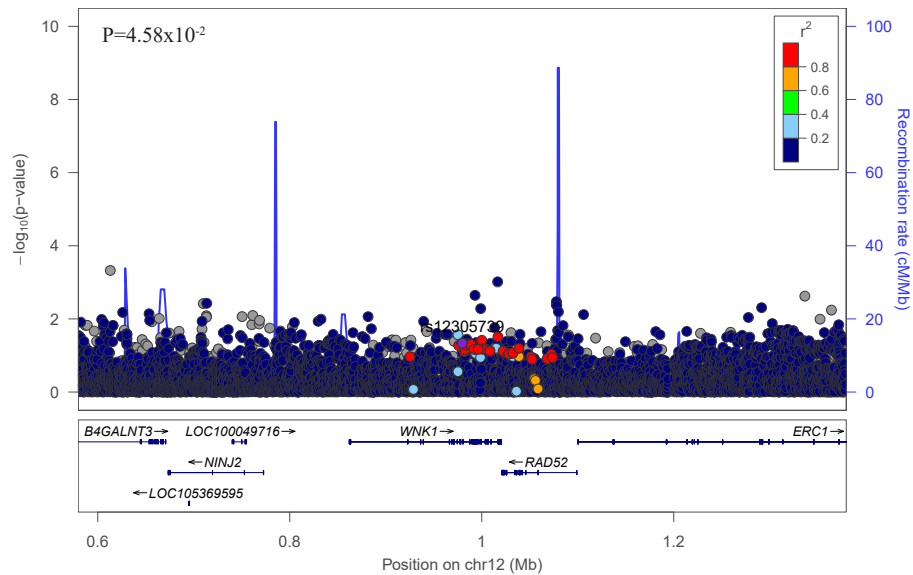

LUSQC : WNK1 – African

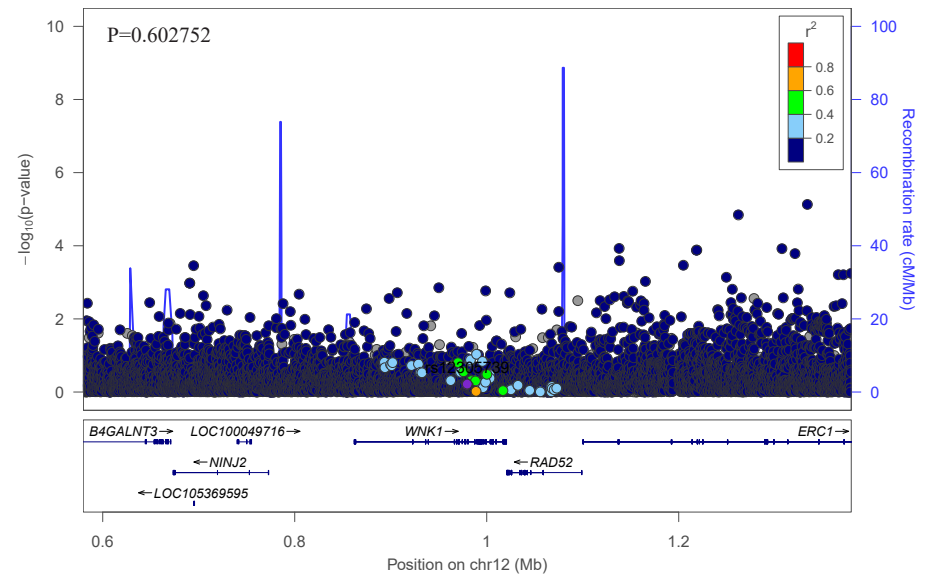

LUSQC : BRCA2 – Combined

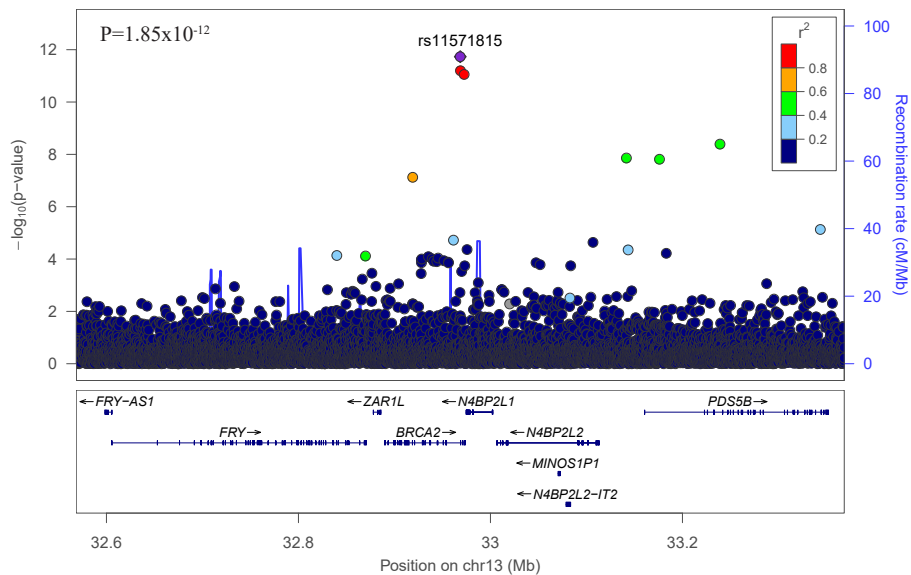

LUSQC : BRCA2 – European

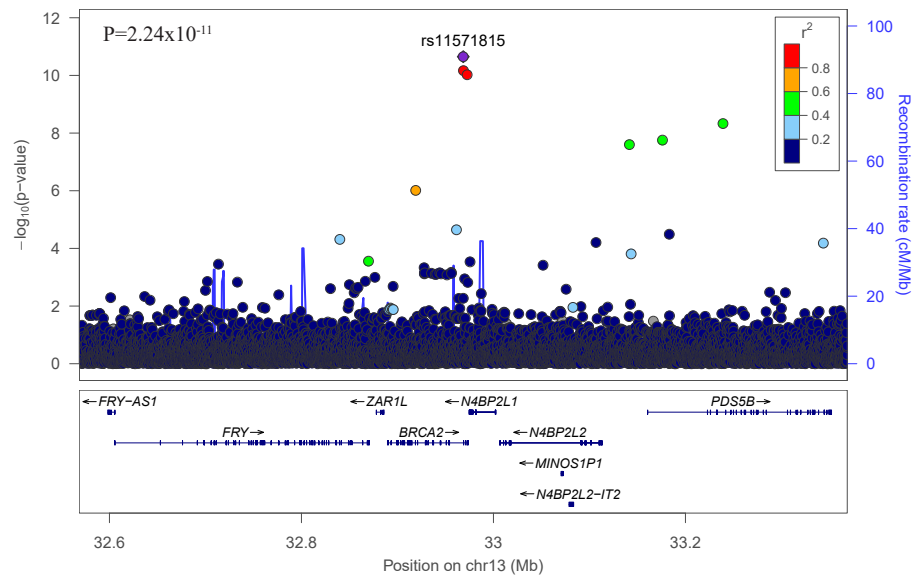

LUSQC : BRCA2 – Asian

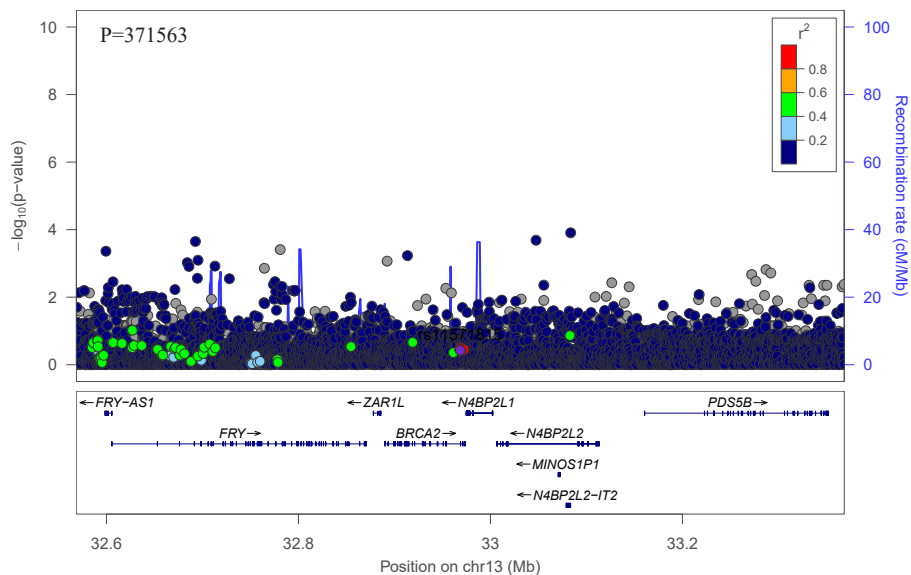

LUSQC : BRCA2 – African

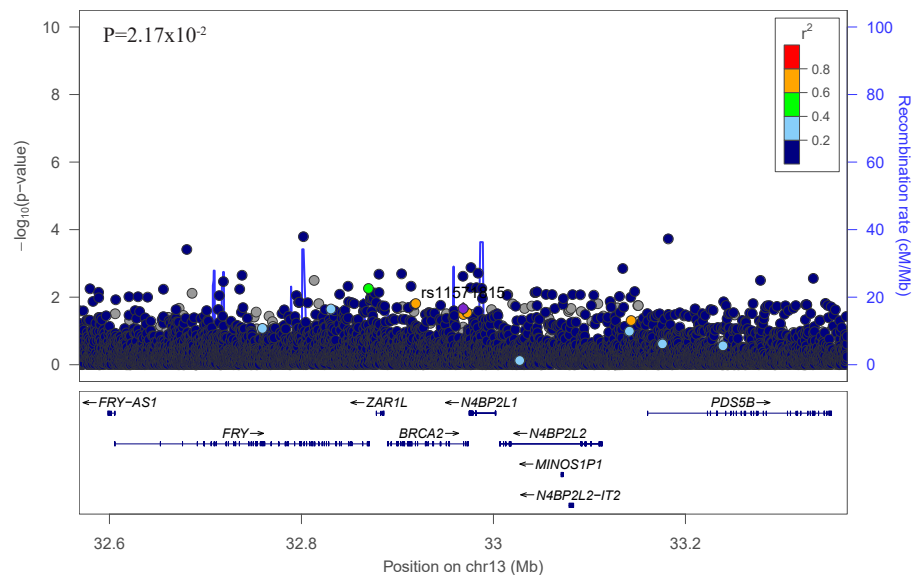

LUSQC : LMAN1L – Combined

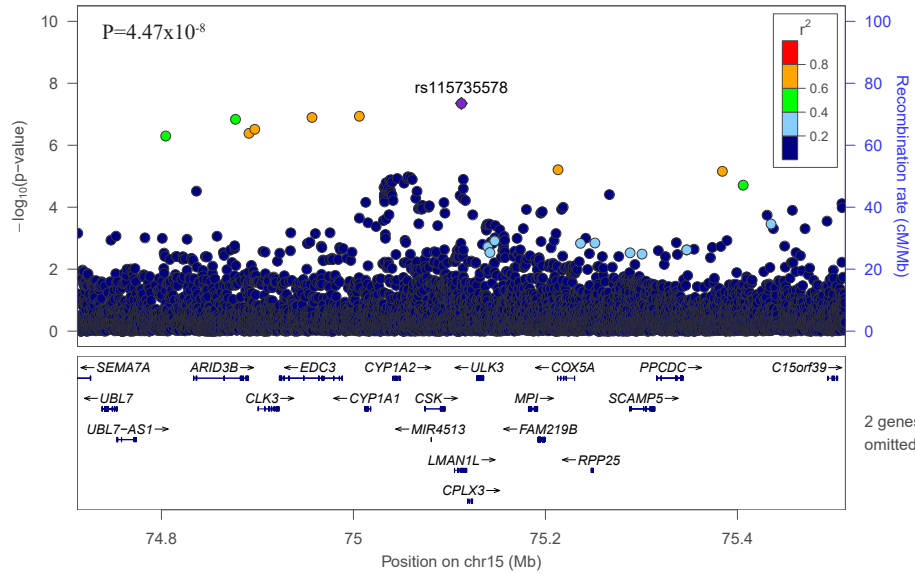

LUSQC : LMAN1L – European

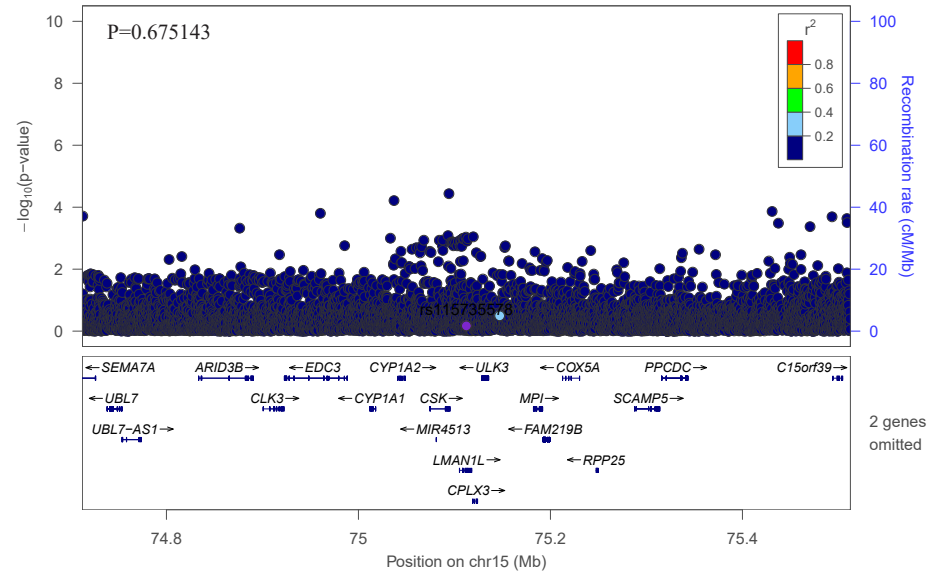

LUSQC : LMAN1L – Asian

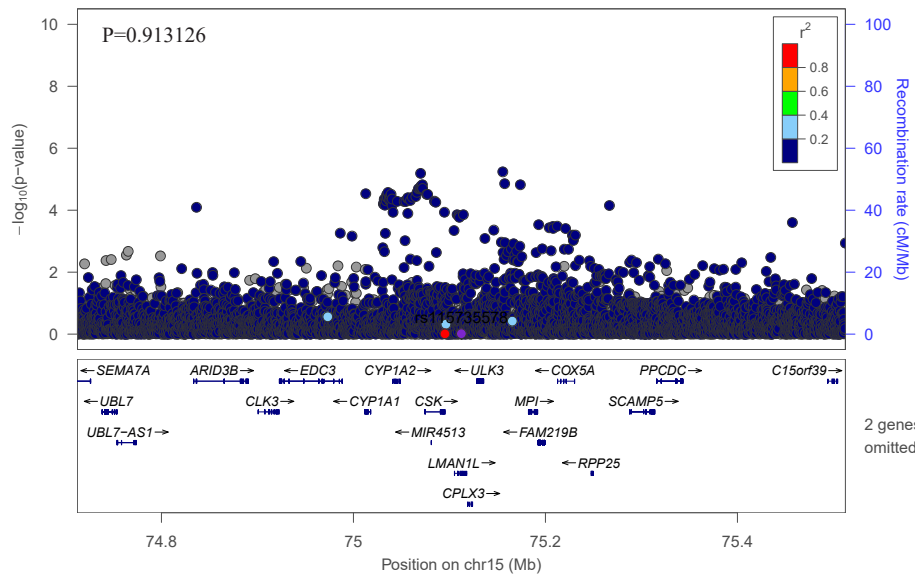

LUSQC : LMAN1L – African

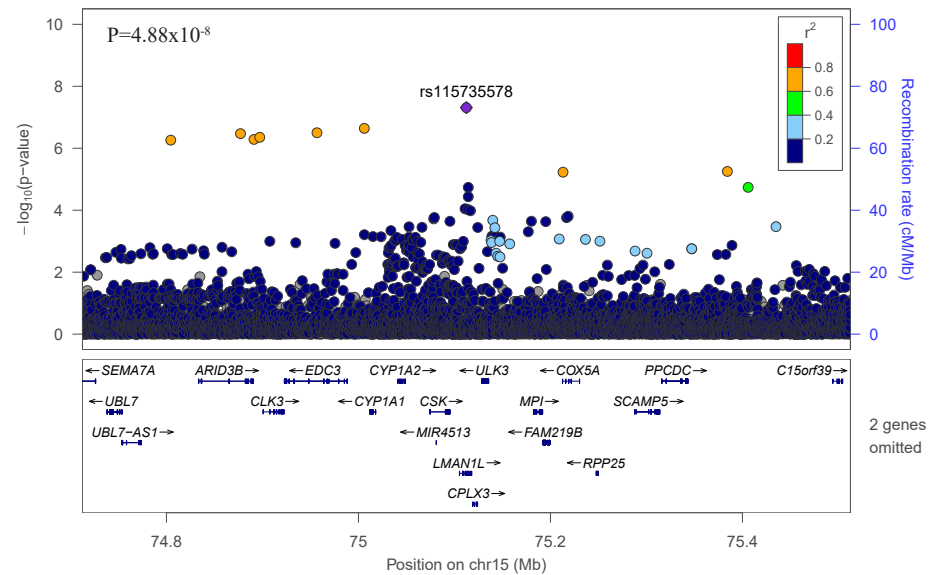

LUSQC : BTBD3\_LINC01722 – Combined

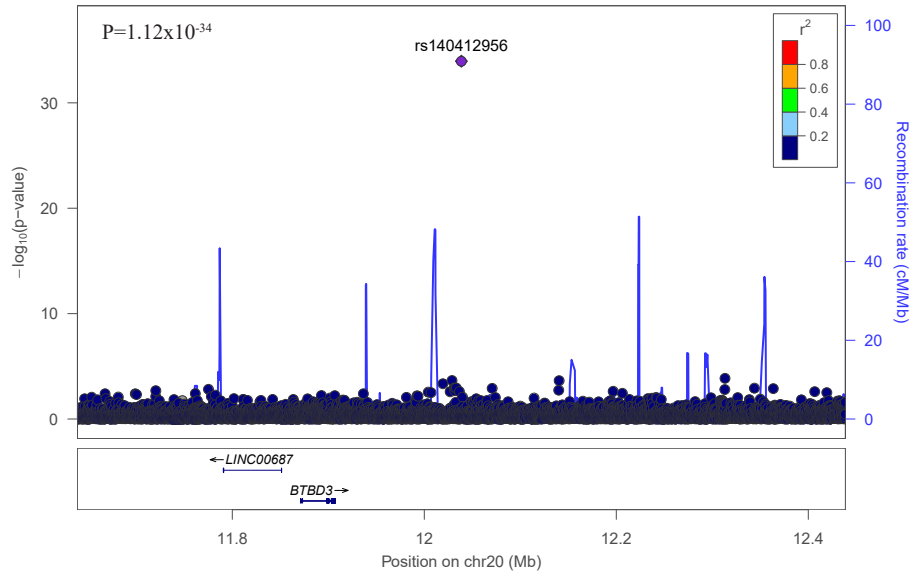

LUSQC : BTBD3\_LINC01722 – European

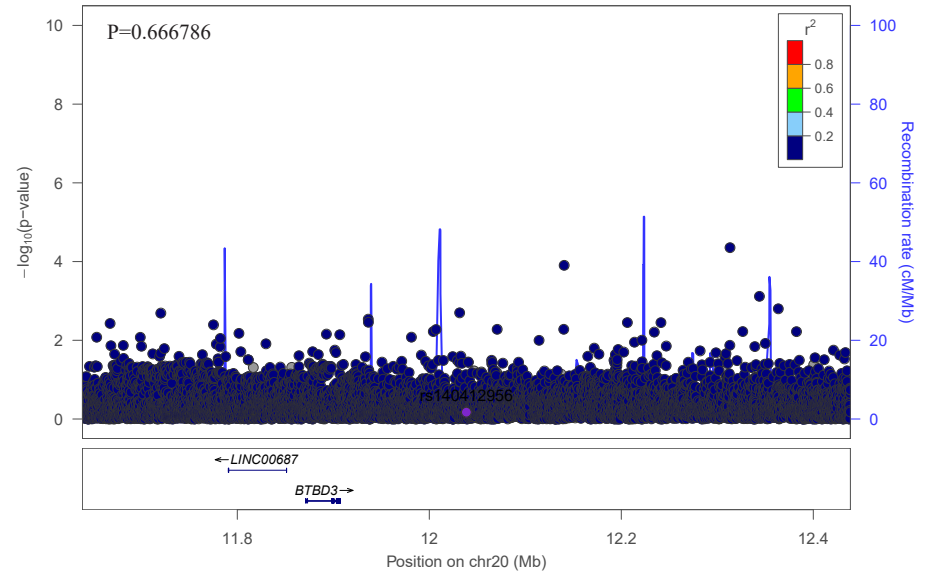

LUSQC : BTBD3\_LINC01722 – Asian

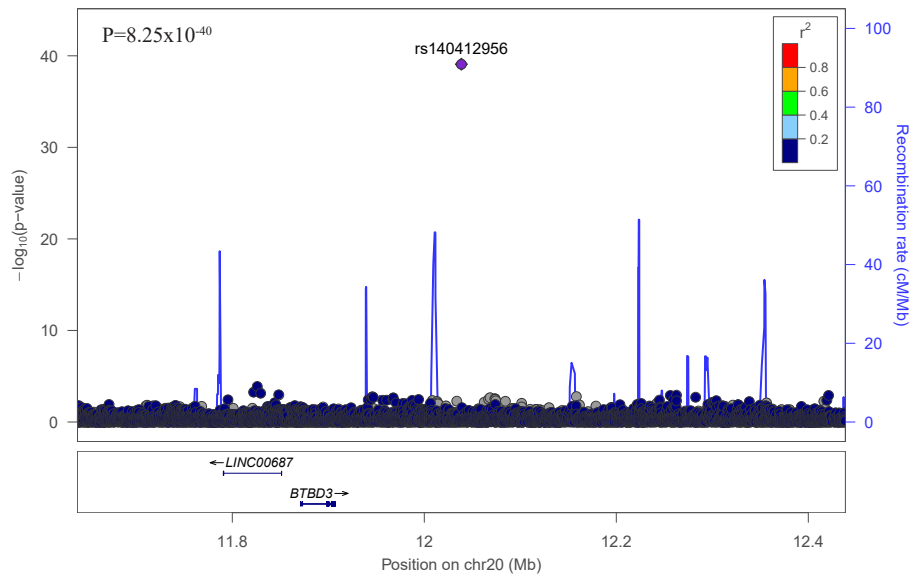

LUSQC : BTBD3\_LINC01722 – African

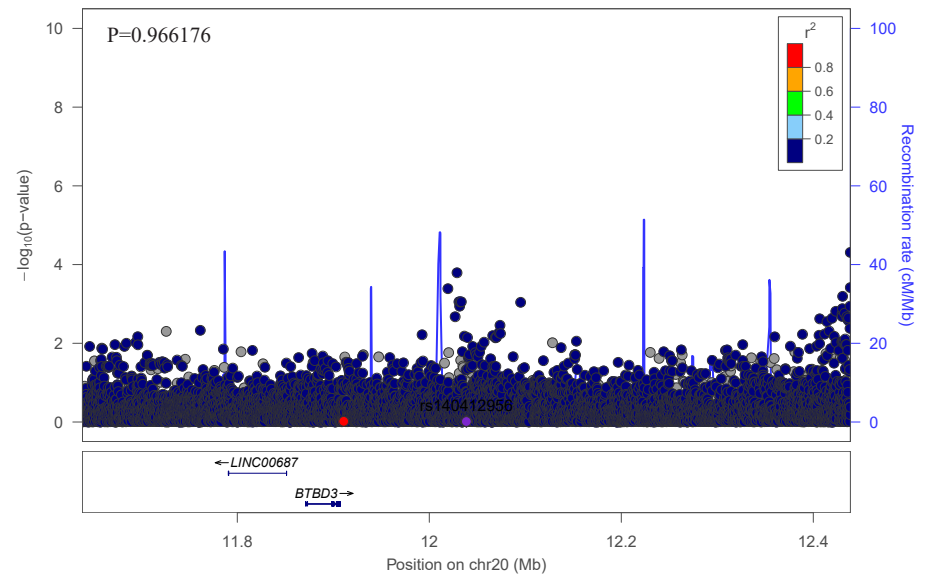

LUSQC : TTC28 – Combined

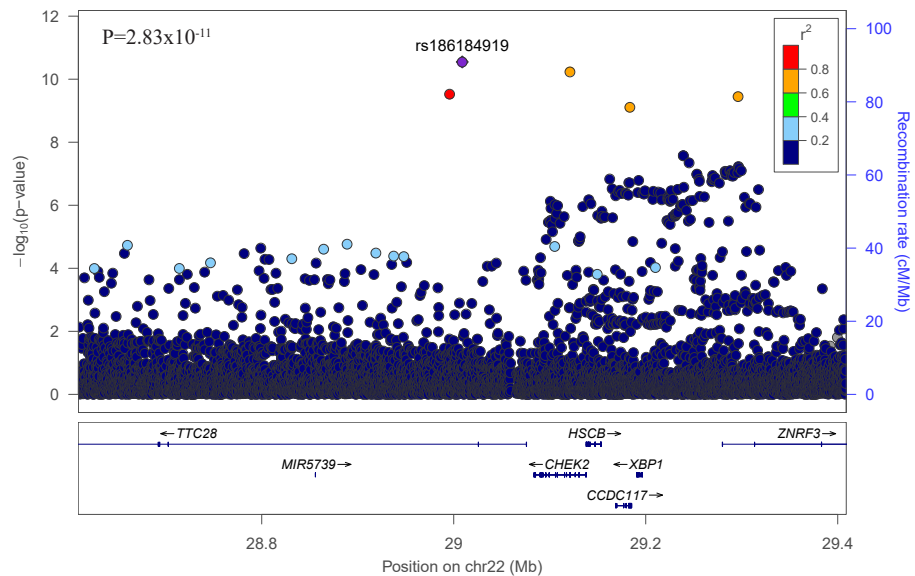

LUSQC : TTC28 – European

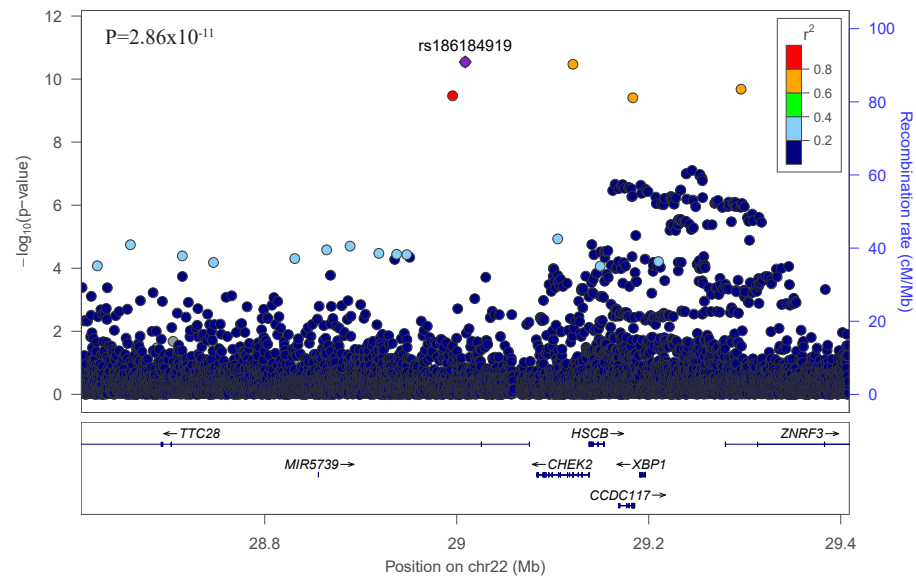

LUSQC : TTC28 – Asian

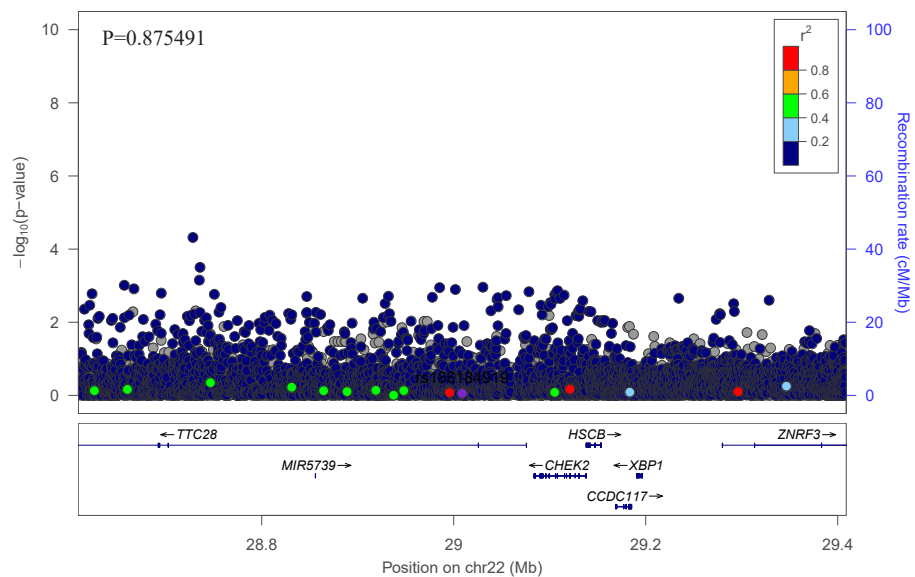

LUSQC : TTC28 – African

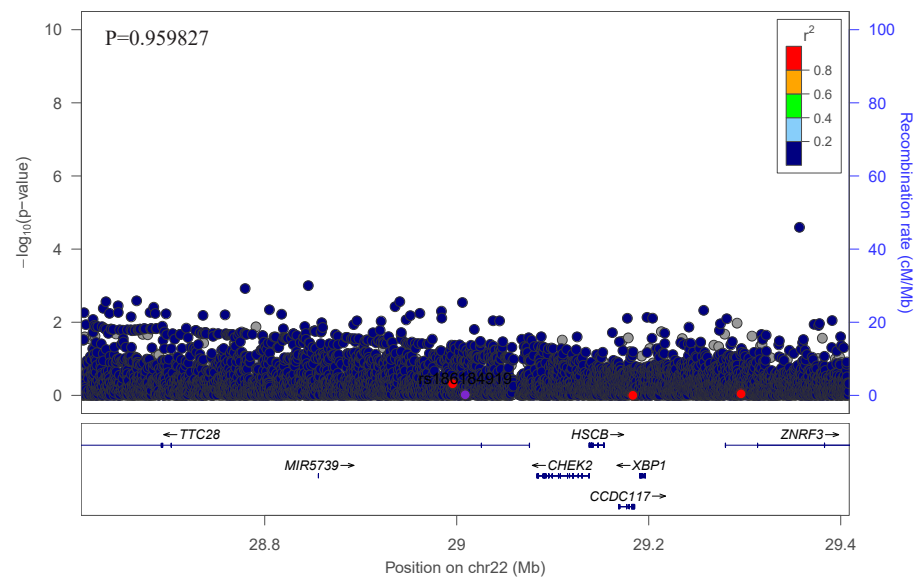

# Small Cell Carcinoma



LUSCC : PABPC1P2\_ACVR2A – Combined

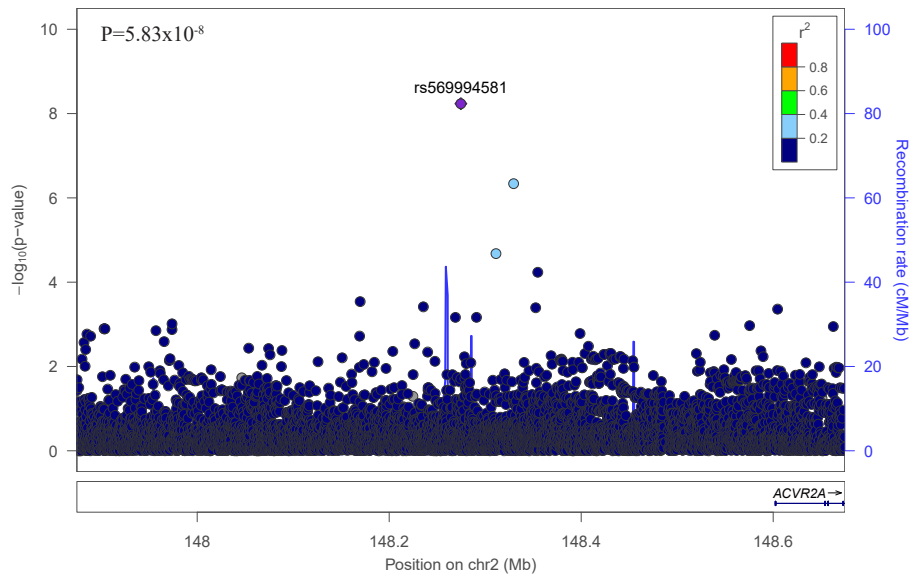

LUSCC : PABPC1P2\_ACVR2A – European

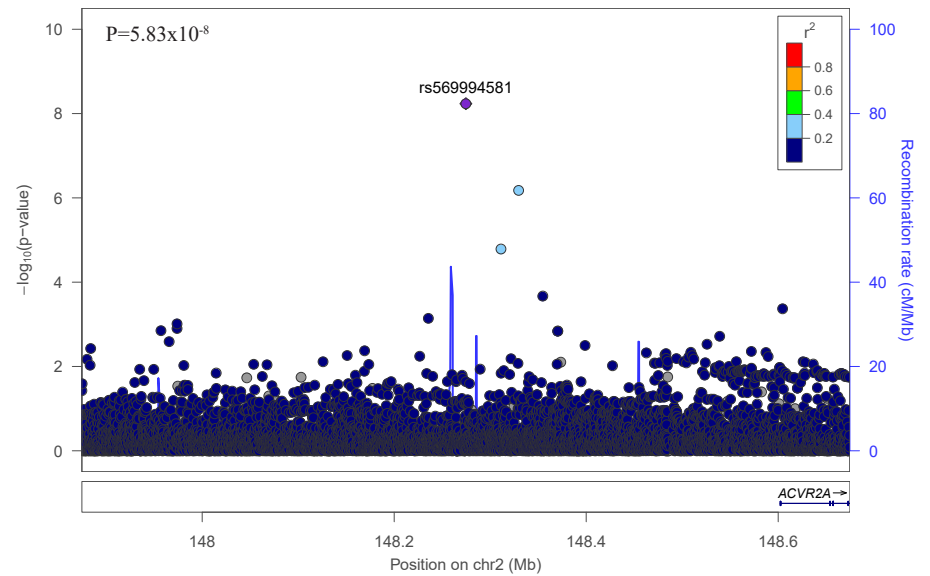

LUSCC : PABPC1P2\_ACVR2A – Asian

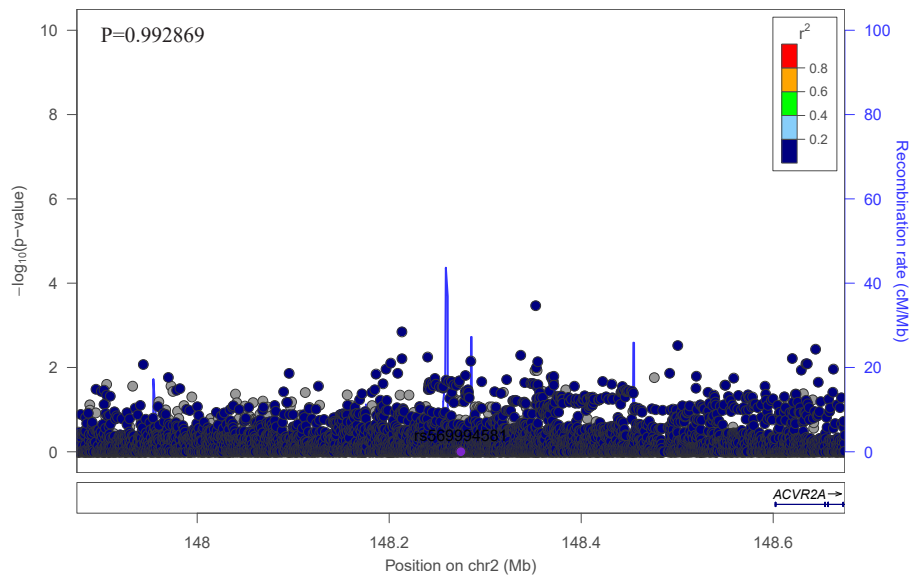

LUSCC : PABPC1P2\_ACVR2A – African

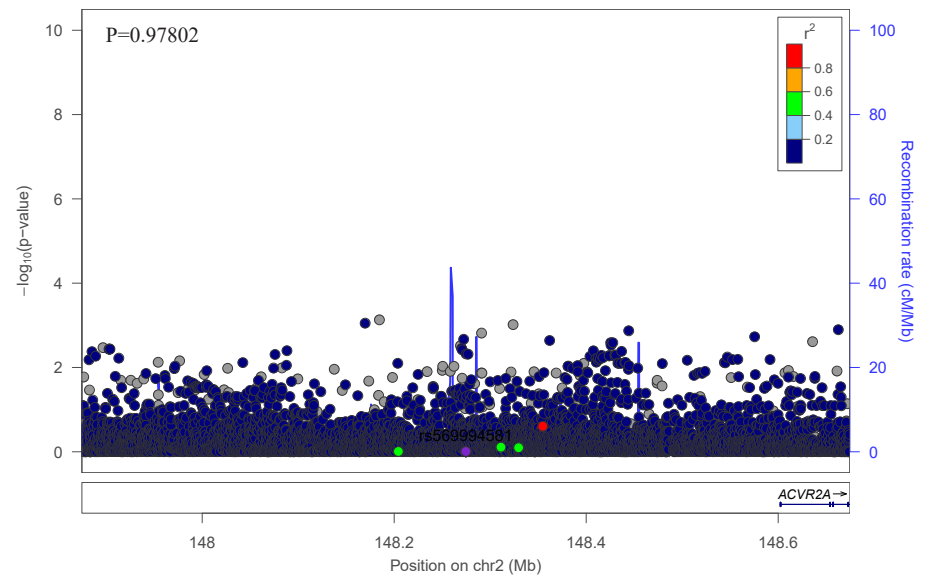

LUSCC : LOC105373782\_LOC101927196 – Combined

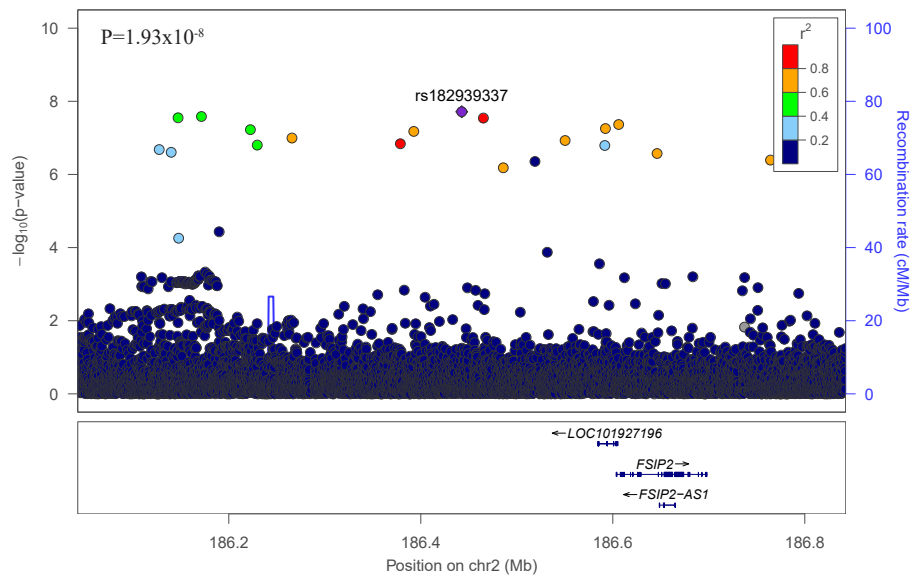

LUSCC : LOC105373782\_LOC101927196 – European

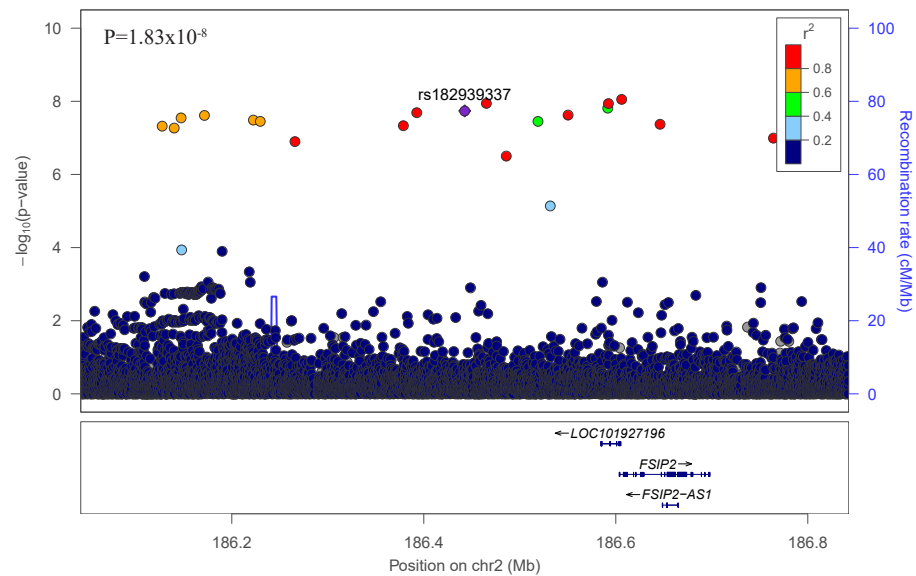

LUSCC : LOC105373782\_LOC101927196 – Asian

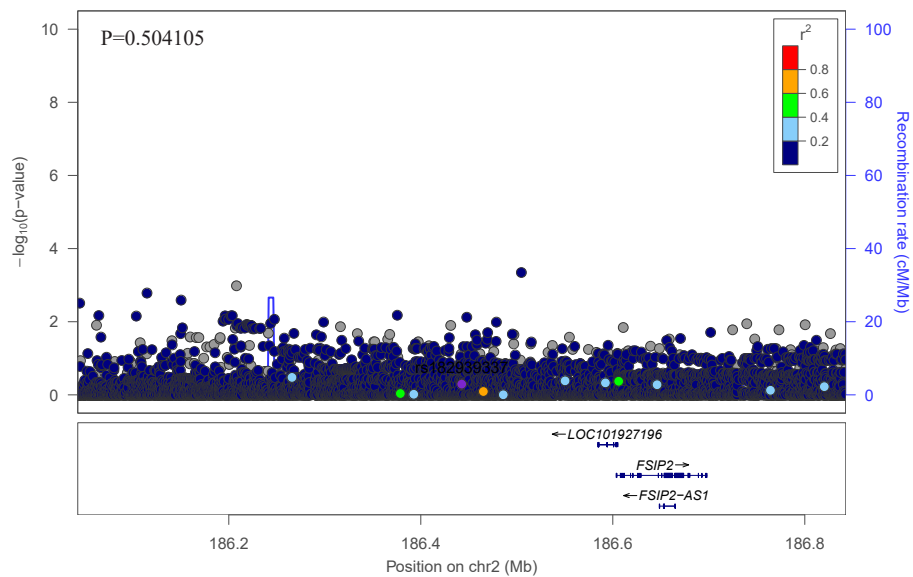

LUSCC : LOC105373782\_LOC101927196 – African

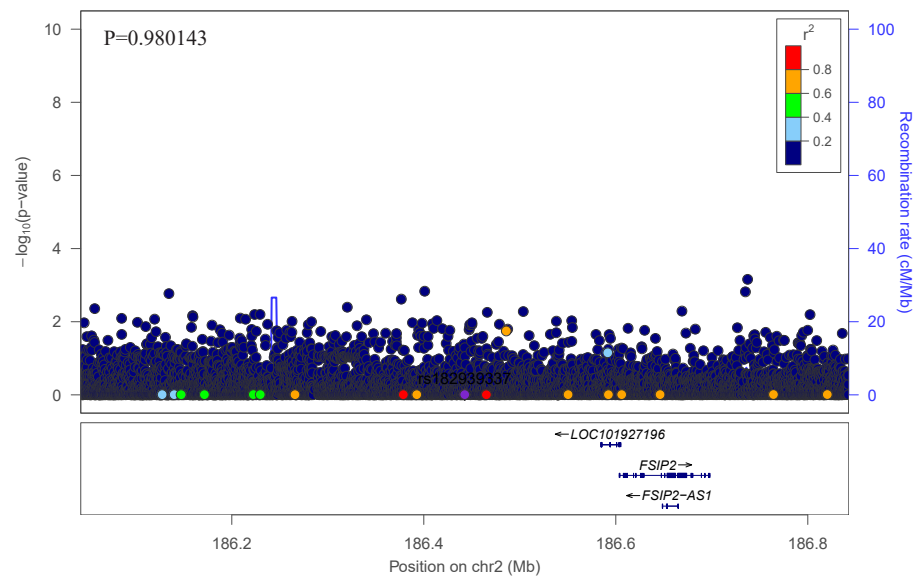

LUSCC : IL17RC – Combined

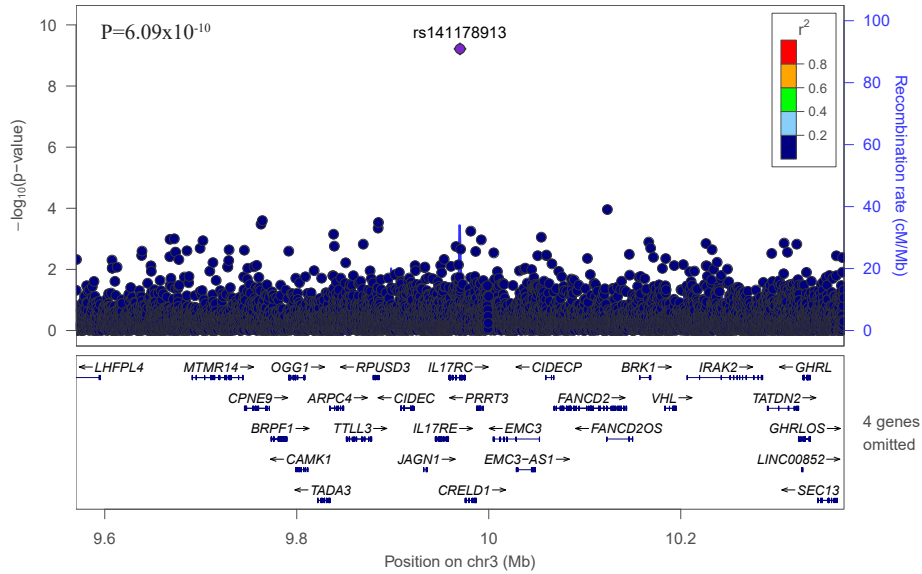

LUSCC : IL17RC – European

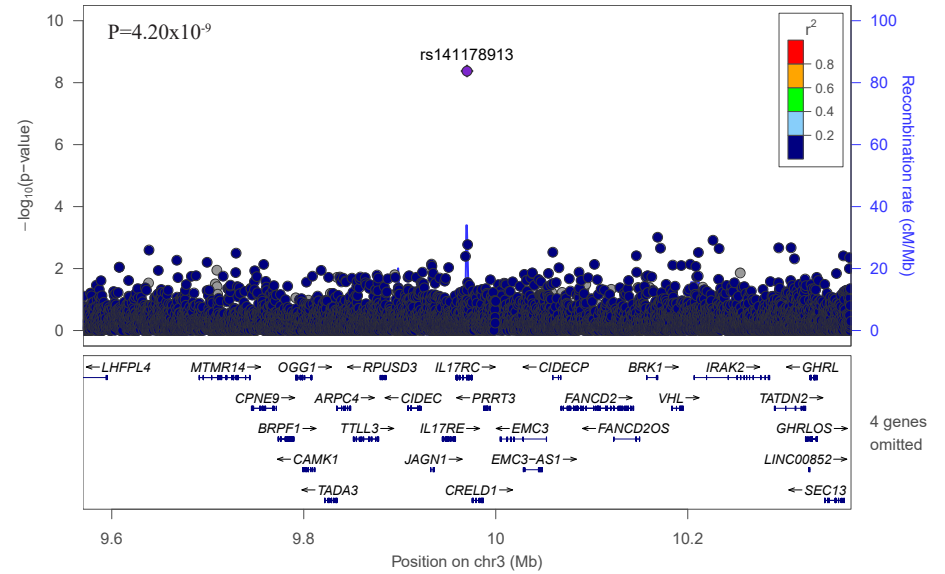

LUSCC : IL17RC – Asian

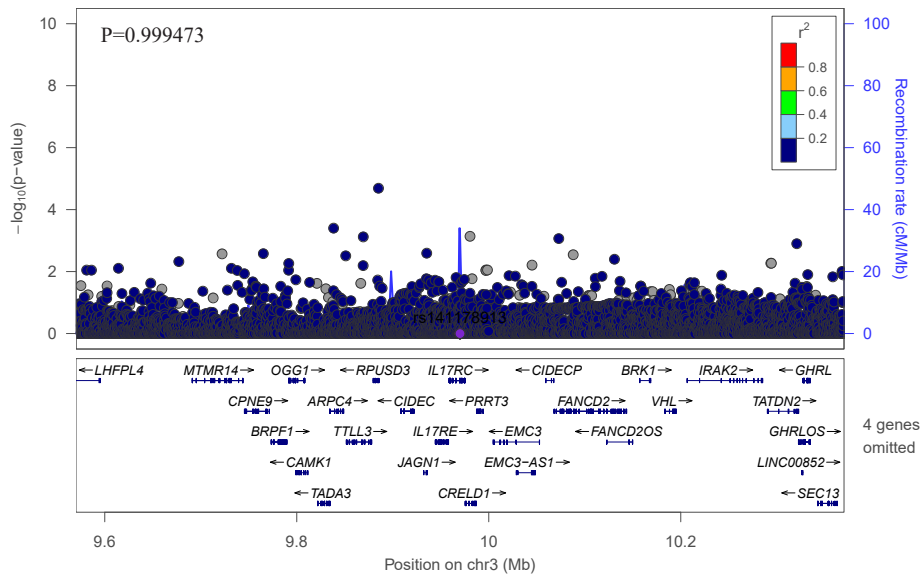

LUSCC : IL17RC – African

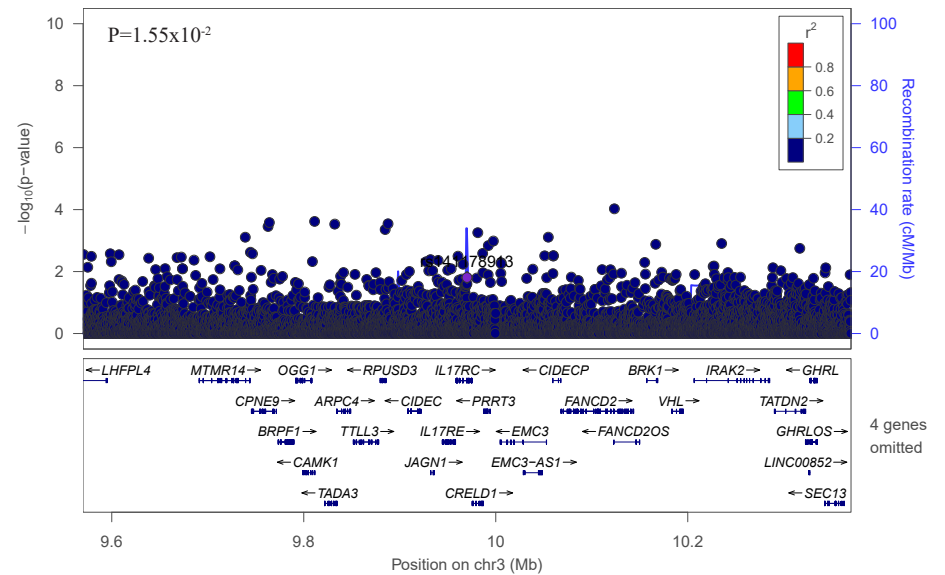

LUSCC : POPDC2\_COX17 – Combined

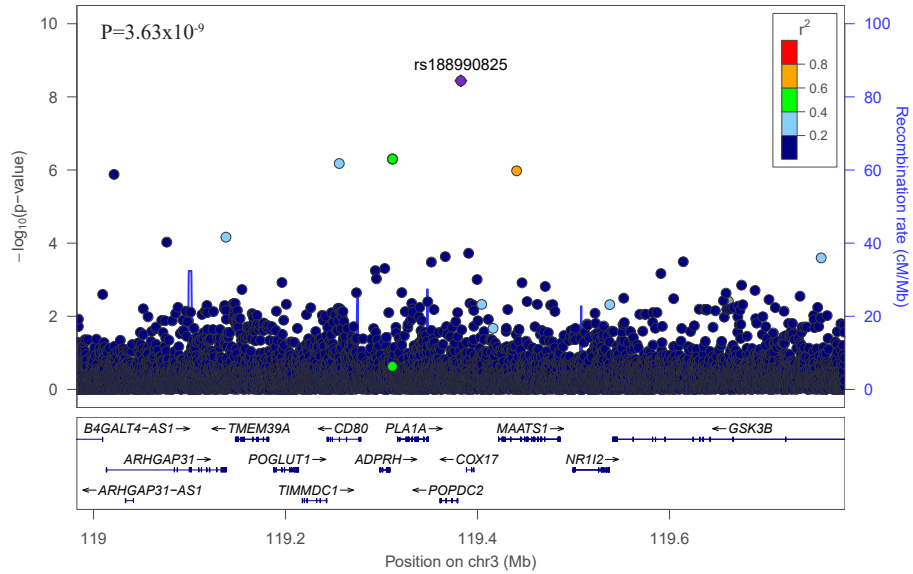

LUSCC : POPDC2\_COX17 – European

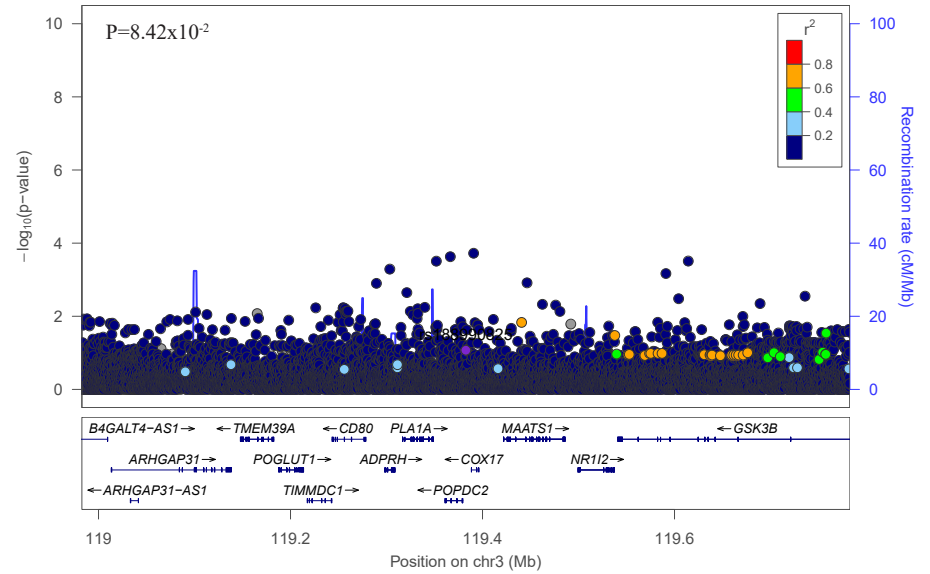

LUSCC : POPDC2\_COX17 – Asian

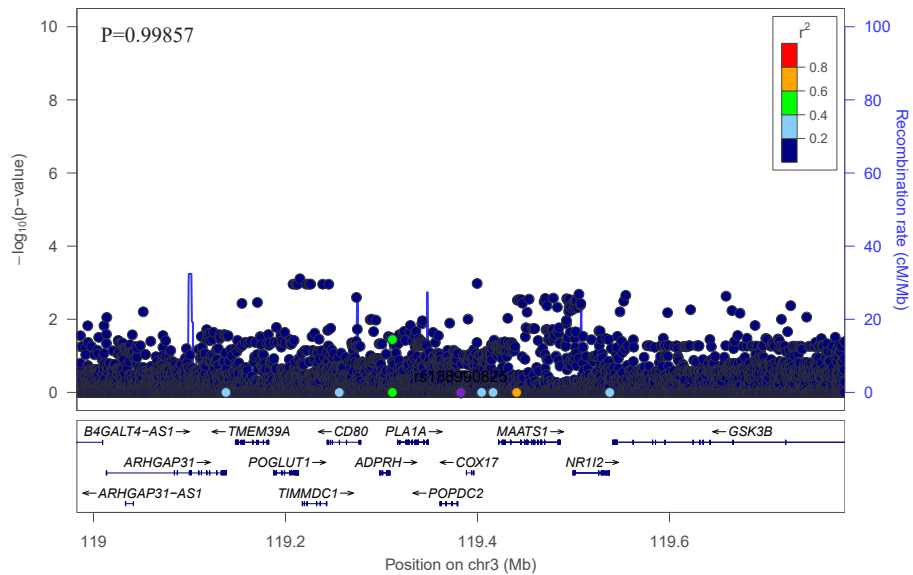

LUSCC : POPDC2\_COX17 – African

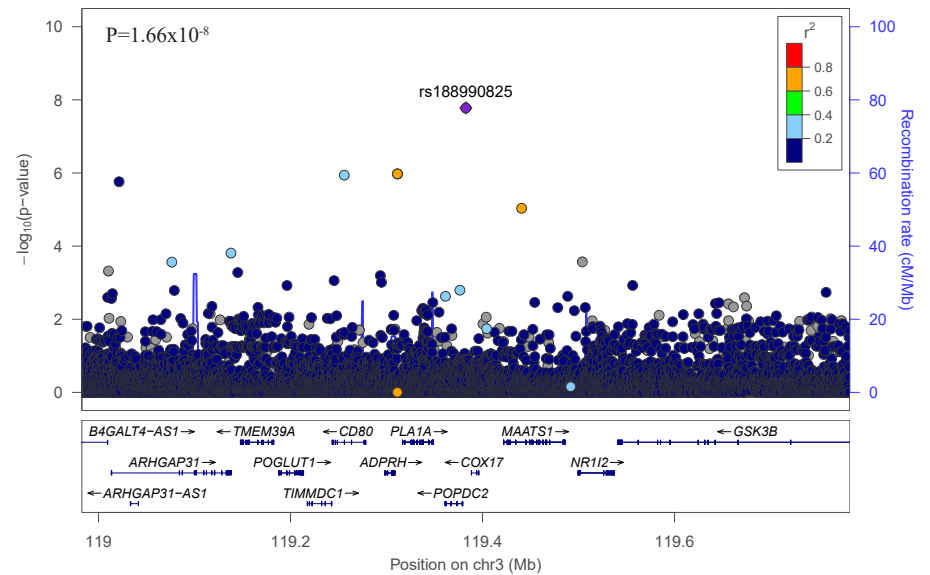

LUSCC : HPF1 – Combined

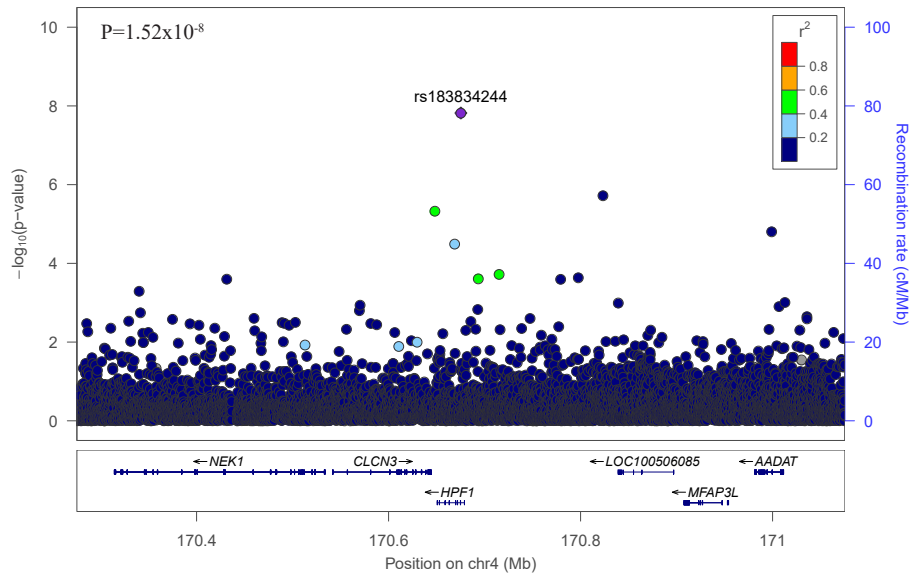

LUSCC : HPF1 – European

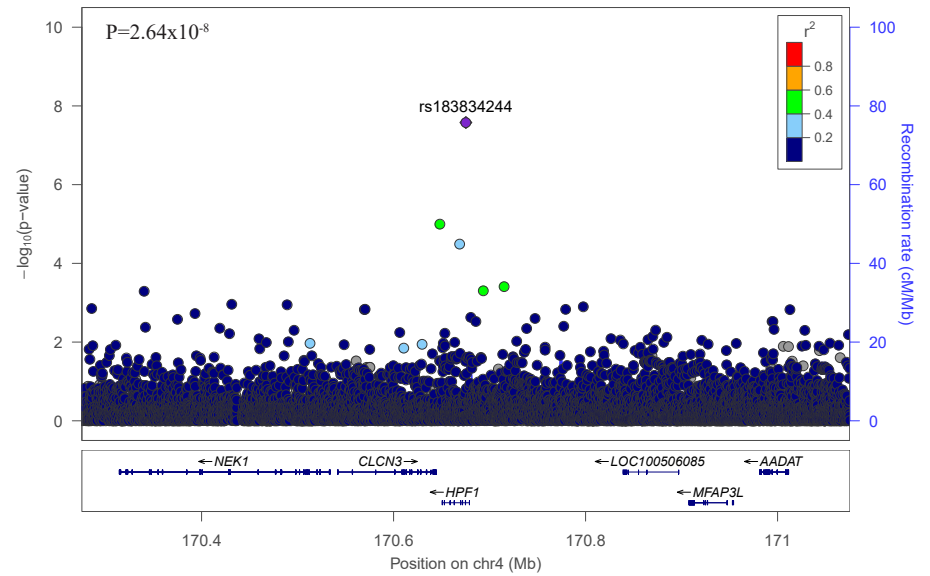

LUSCC : HPF1 – Asian

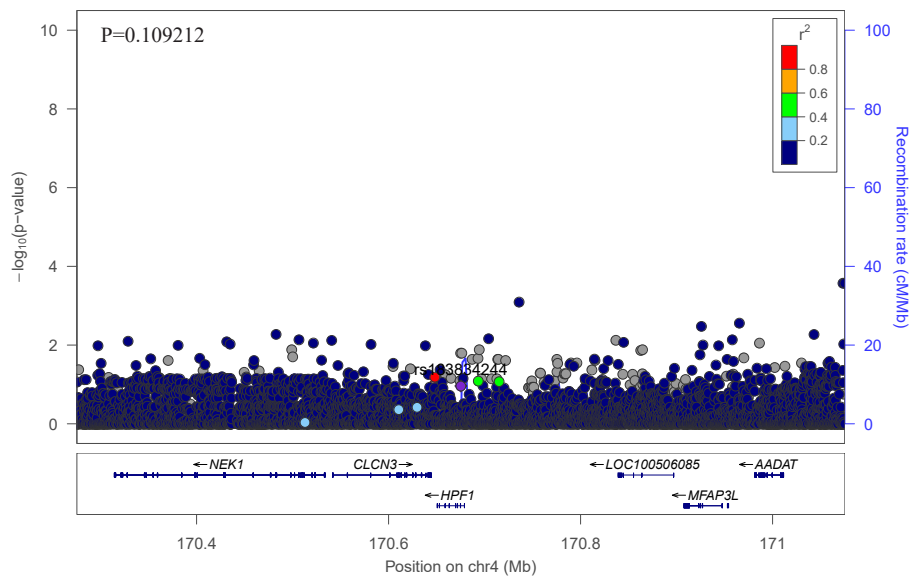

LUSCC : HPF1 – African

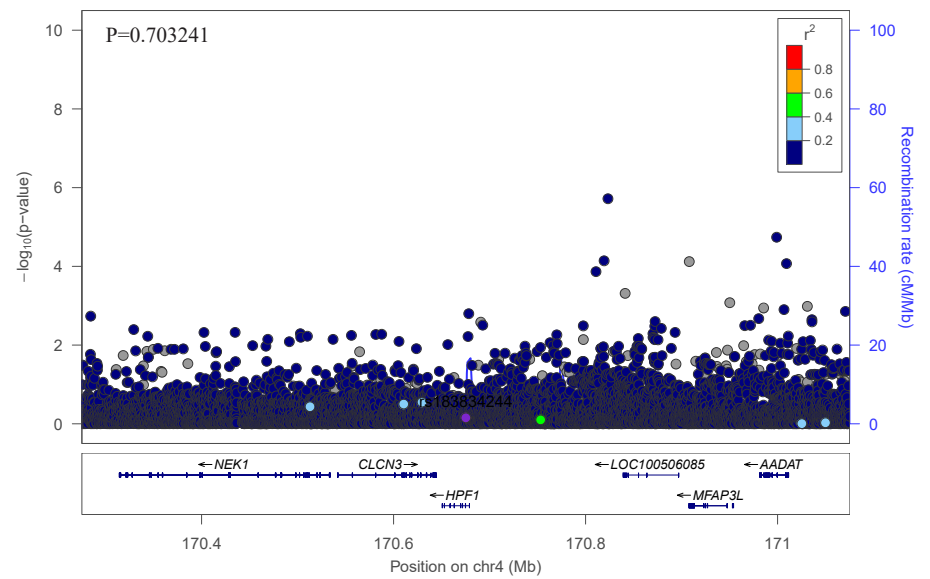

LUSCC : LINC01612\_LINC02382 – Combined

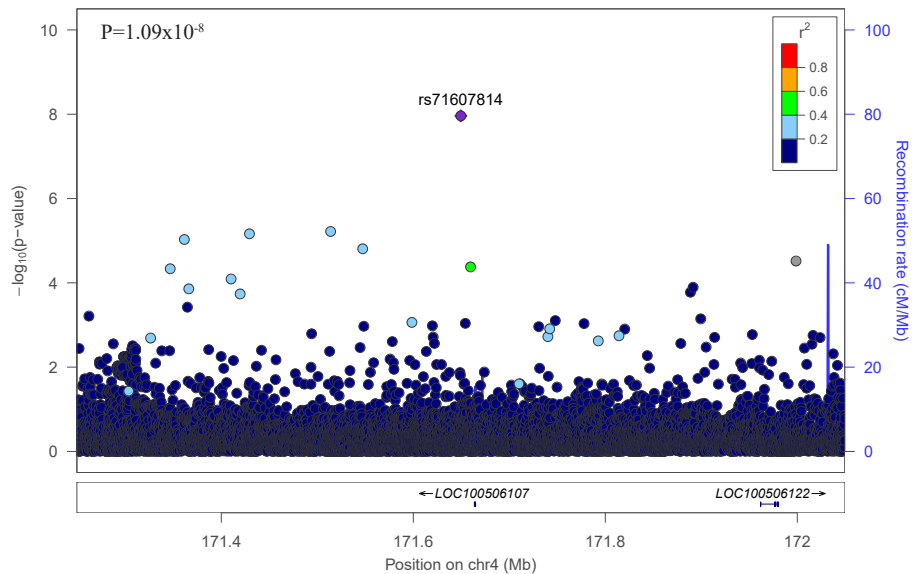

LUSCC : LINC01612\_LINC02382 – European

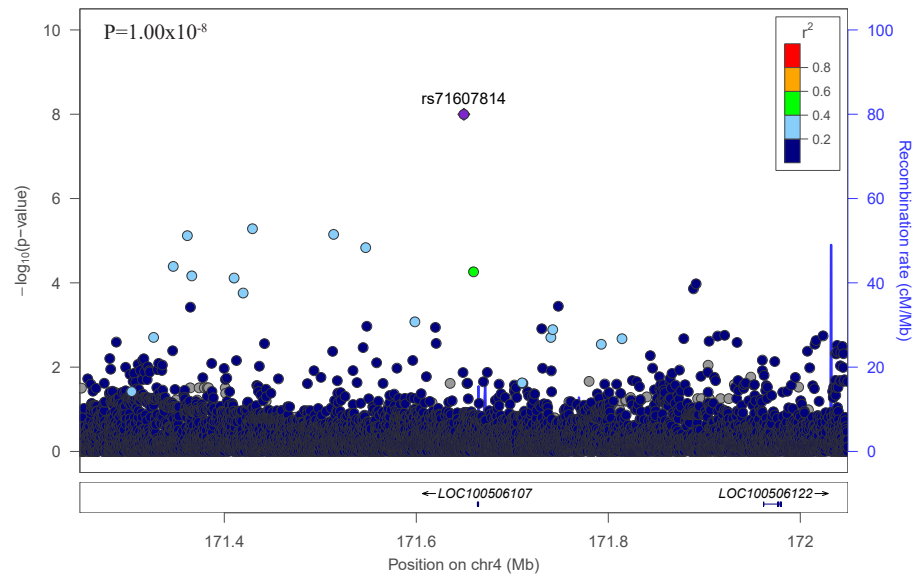

LUSCC : LINC01612\_LINC02382 – Asian

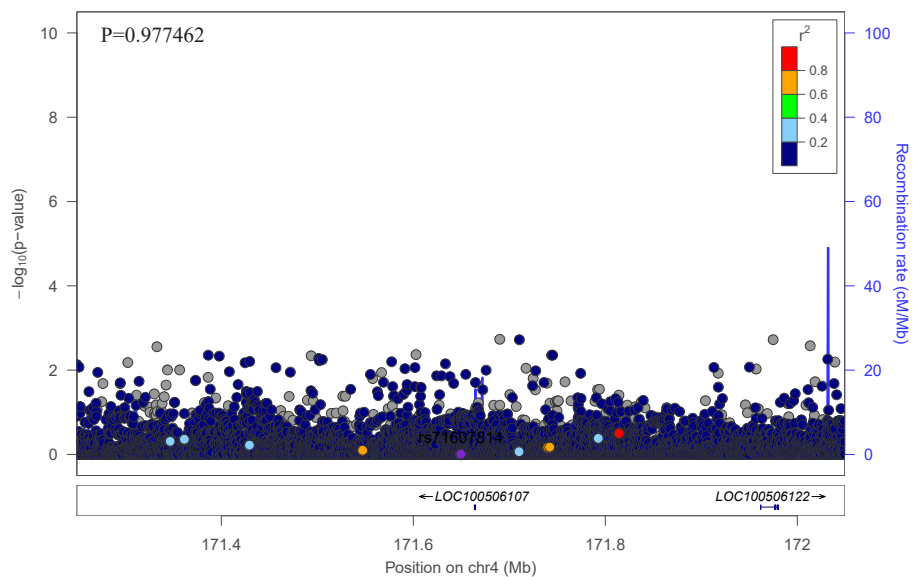

LUSCC : LINC01612\_LINC02382 – African

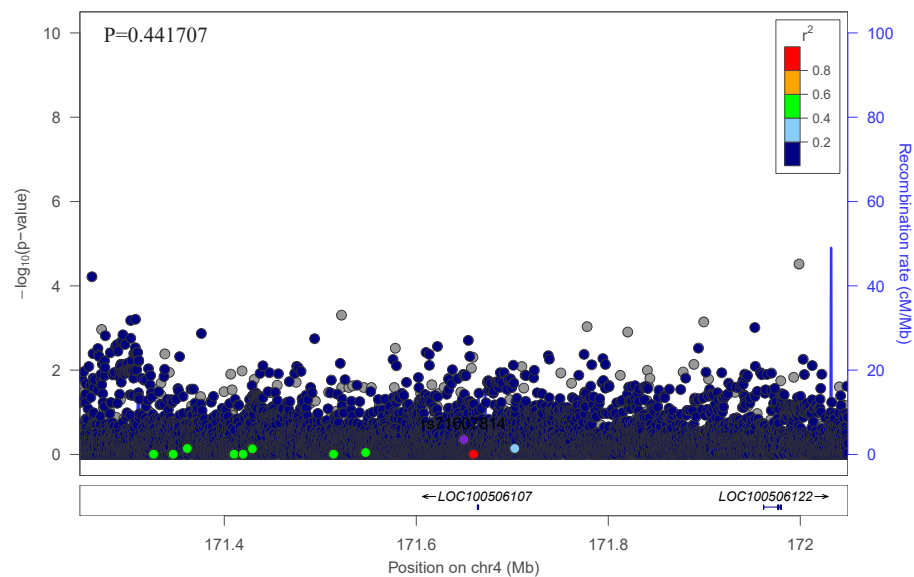

LUSCC : LINC01556\_HCG15 – Combined

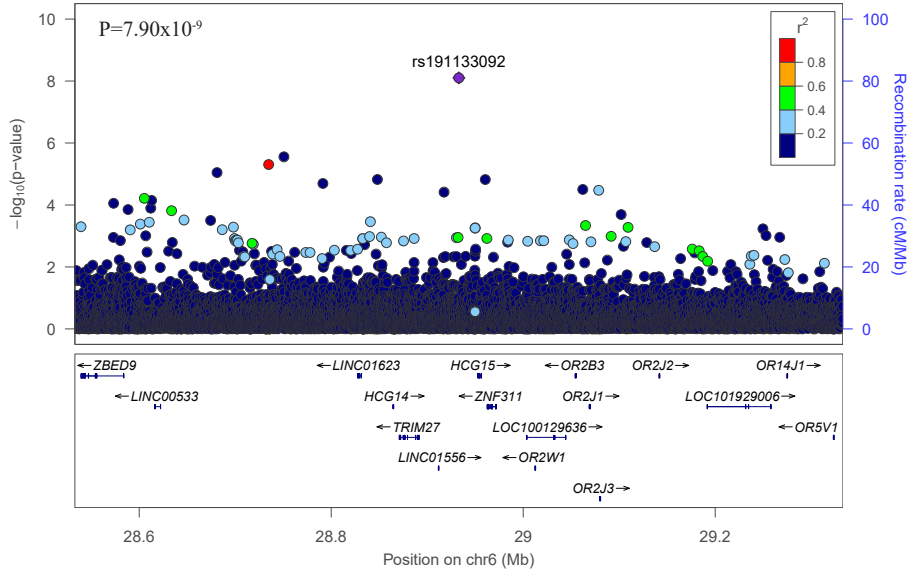

LUSCC : LINC01556\_HCG15 – European

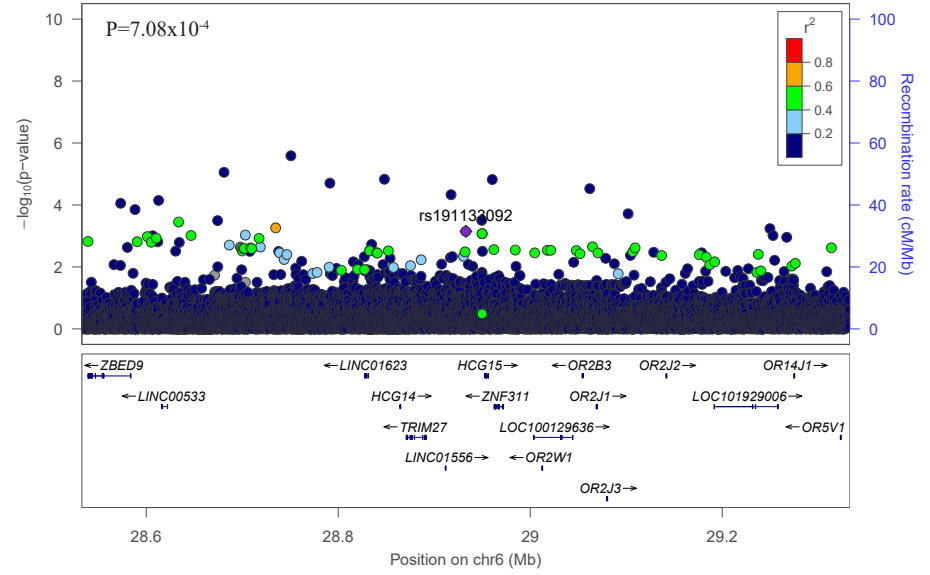

LUSCC : LINC01556\_HCG15 – Asian

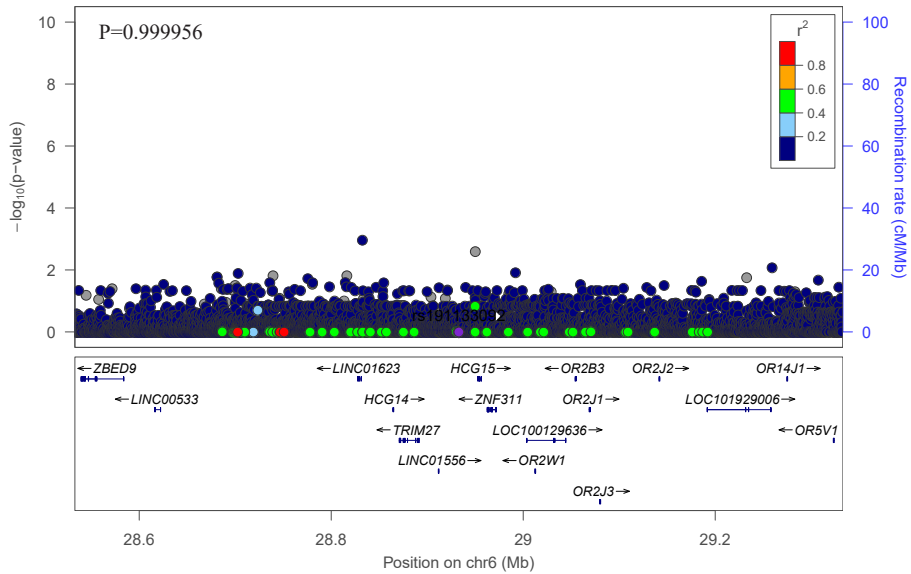

LUSCC : LINC01556\_HCG15 – African

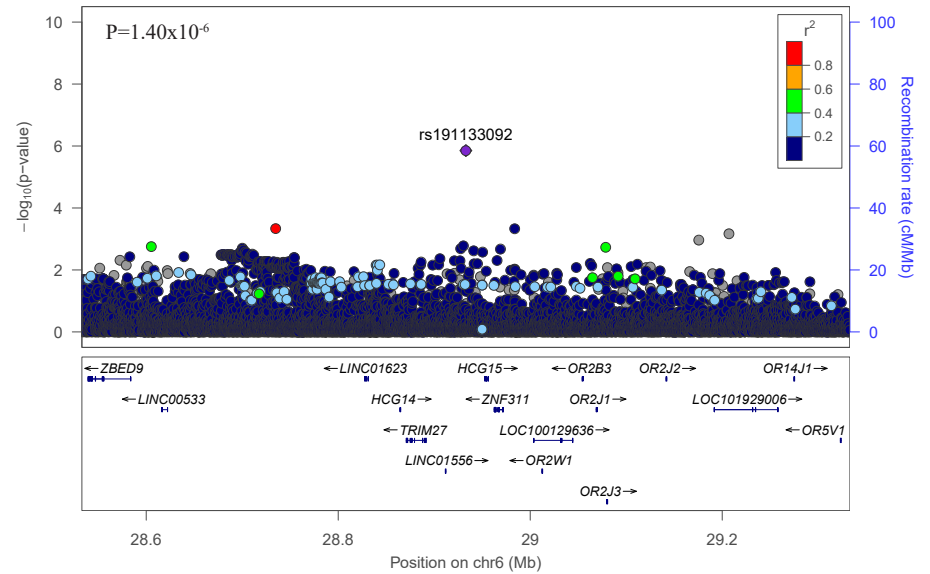

LUSCC : THSD7A – Combined

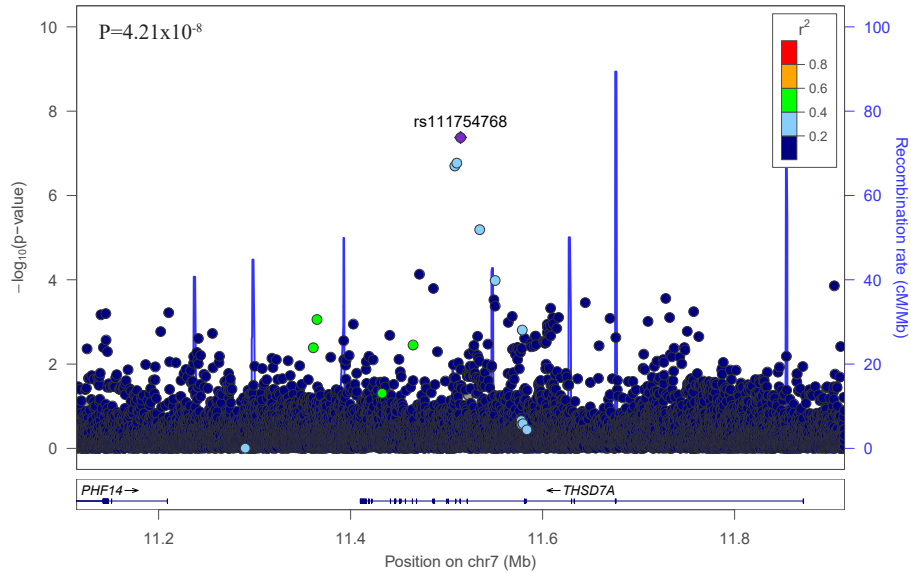

LUSCC : THSD7A – European

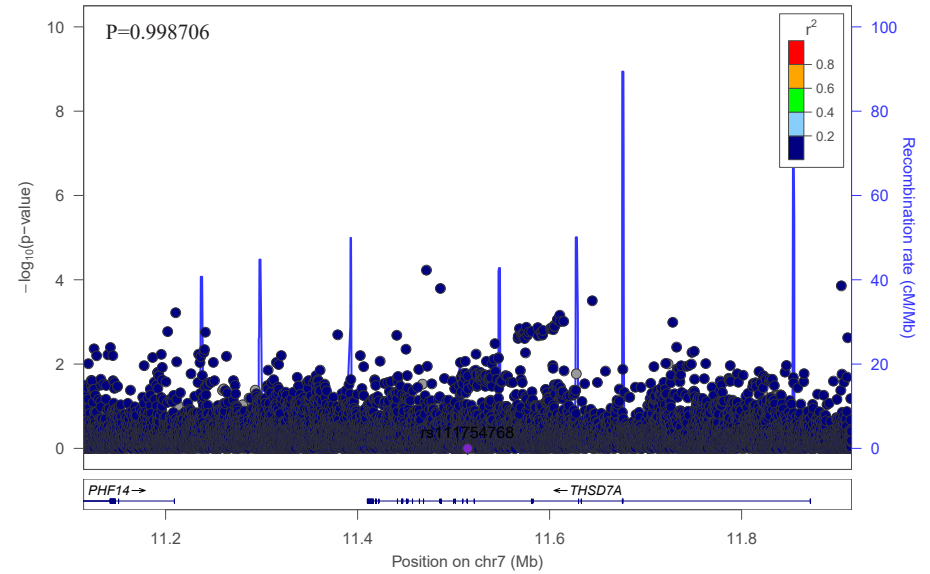

LUSCC : THSD7A – Asian

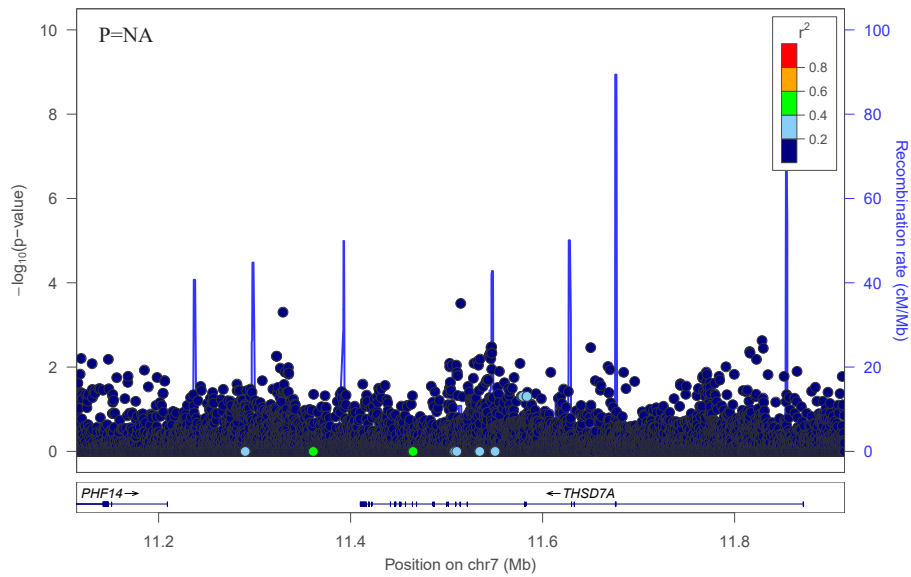

LUSCC : THSD7A – African

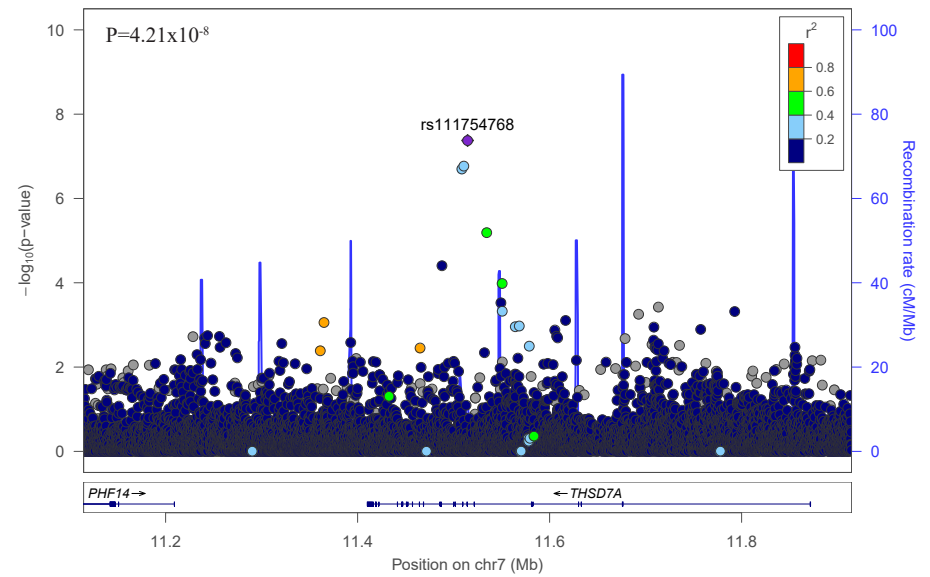



LUSCC : DLC1 – Combined

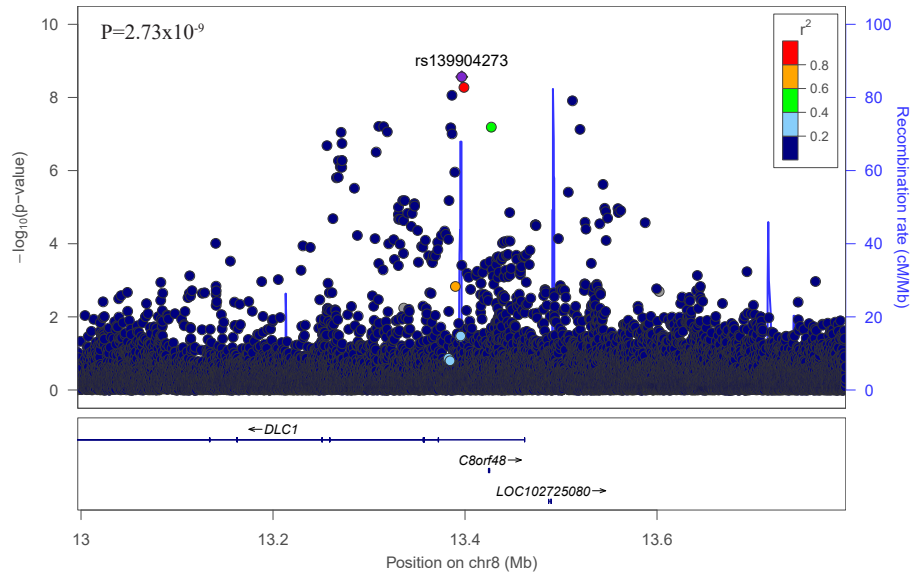

LUSCC : DLC1 – European

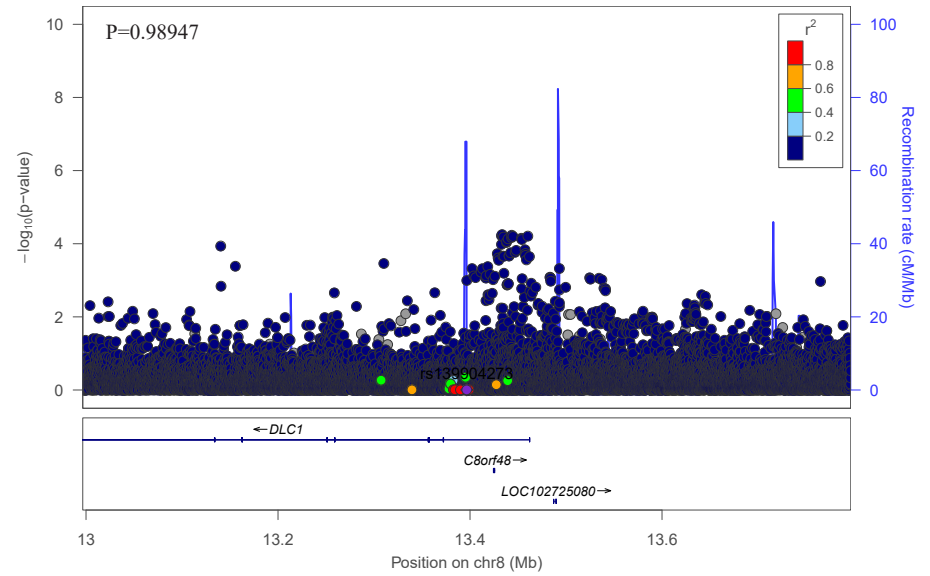

LUSCC : DLC1 – Asian

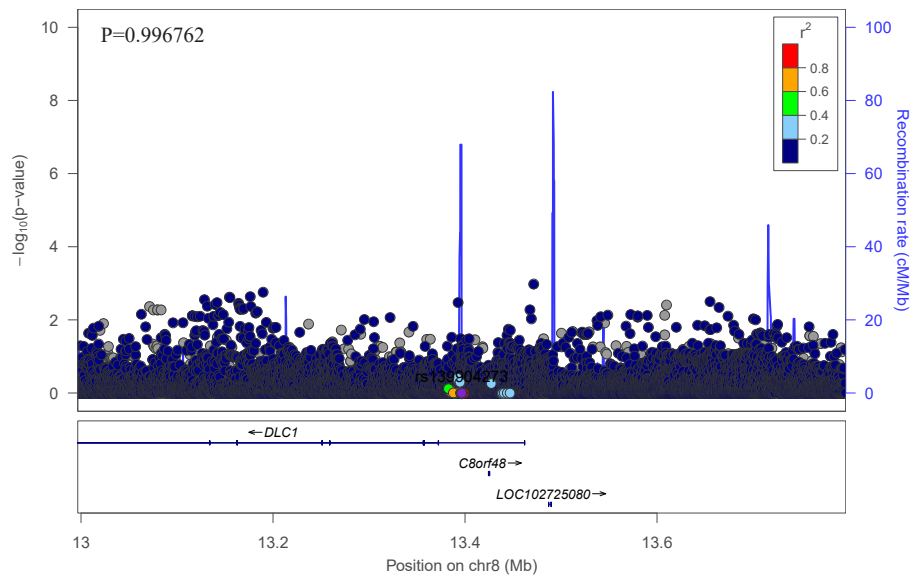

LUSCC : DLC1 – African

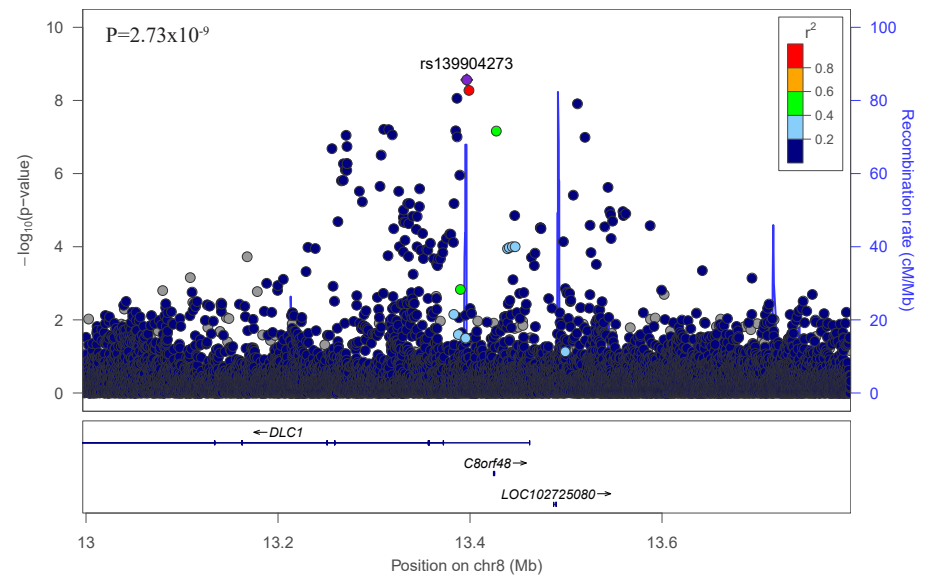

LUSCC : VPS13B – Combined

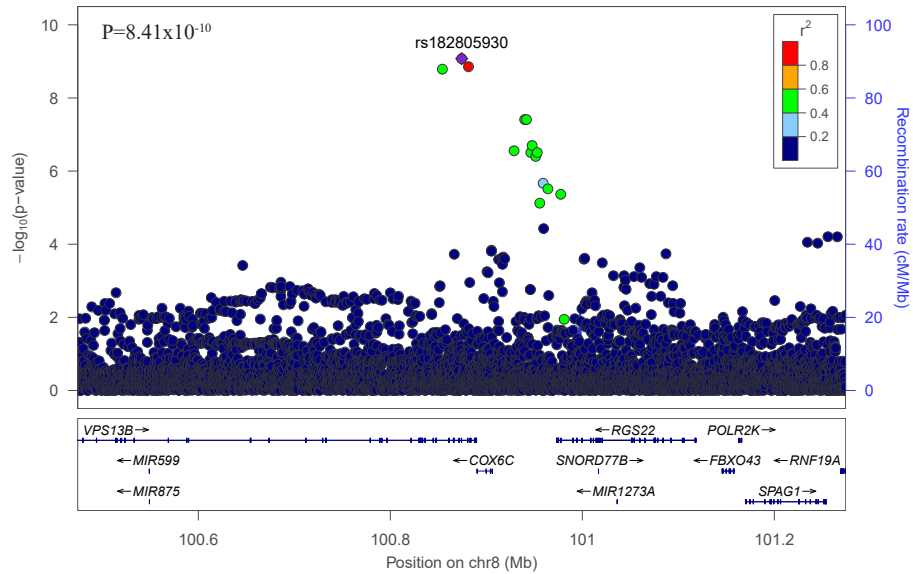

LUSCC : VPS13B – European

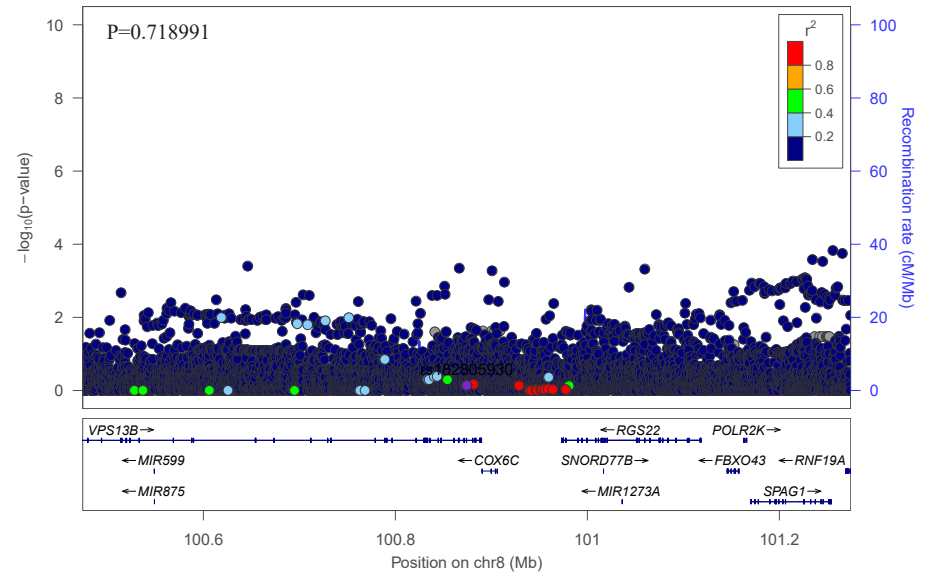

LUSCC : VPS13B – Asian

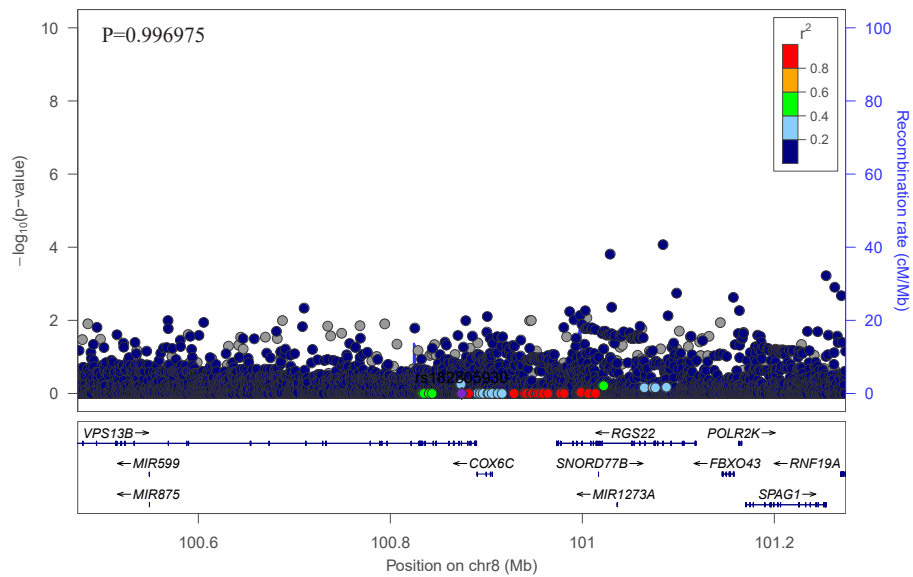

LUSCC : VPS13B – African

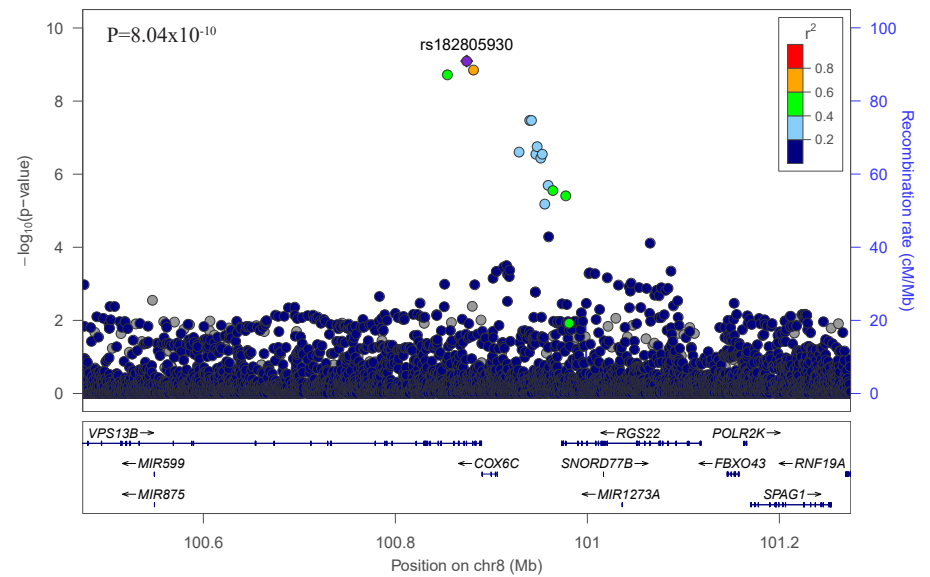

LUSCC : LINC02237\_CSMD3 – Combined

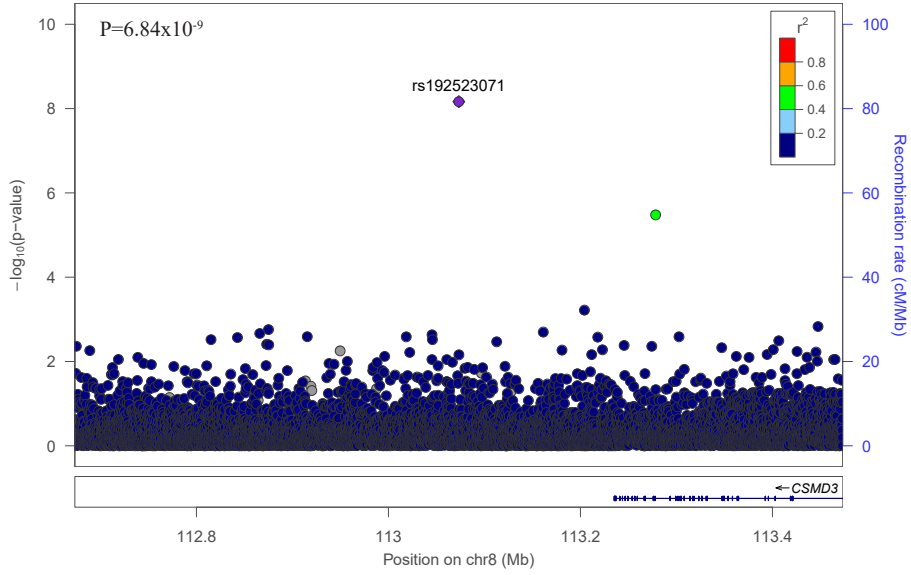

LUSCC : LINC02237\_CSMD3 – European

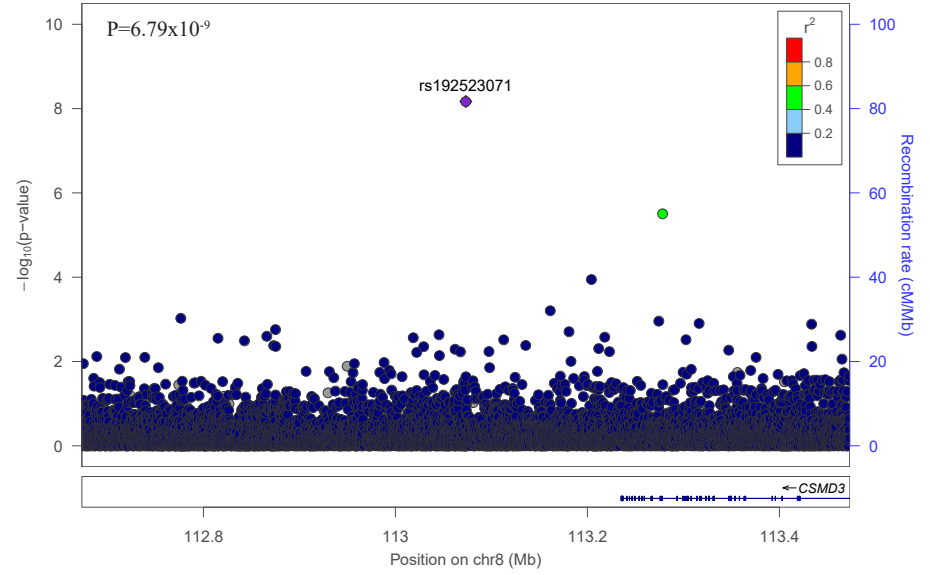

LUSCC : LINC02237\_CSMD3 – Asian

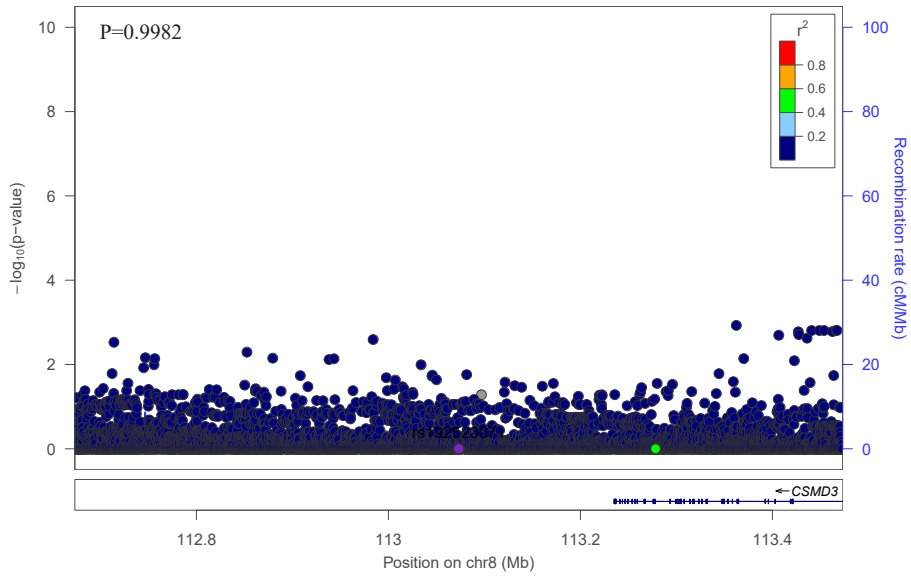

LUSCC : LINC02237\_CSMD3 – African

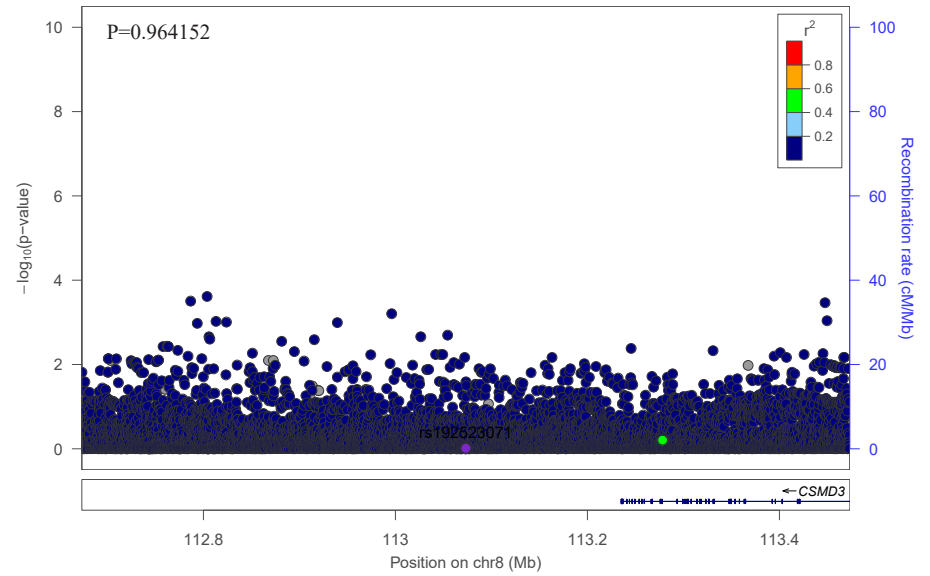

LUSCC : NECTIN1 – Combined

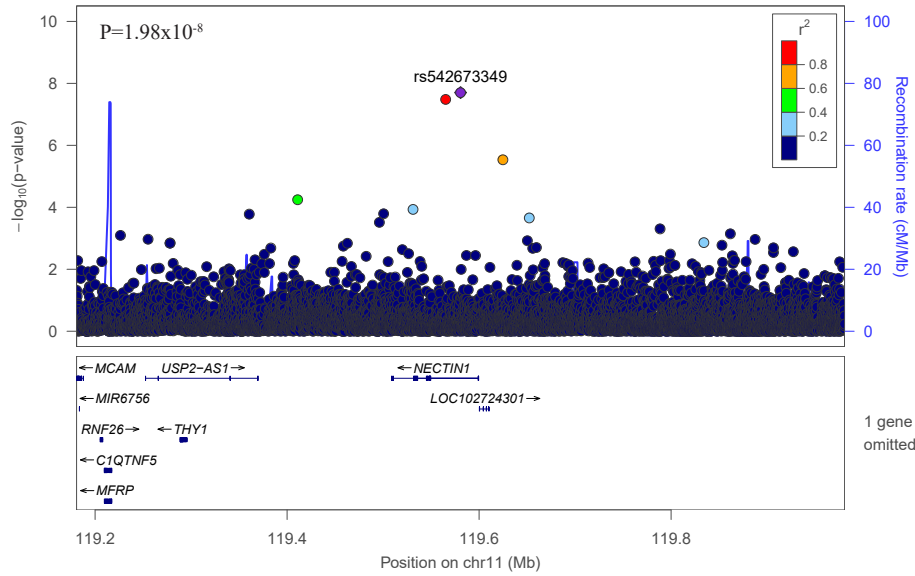

LUSCC : NECTIN1 – European

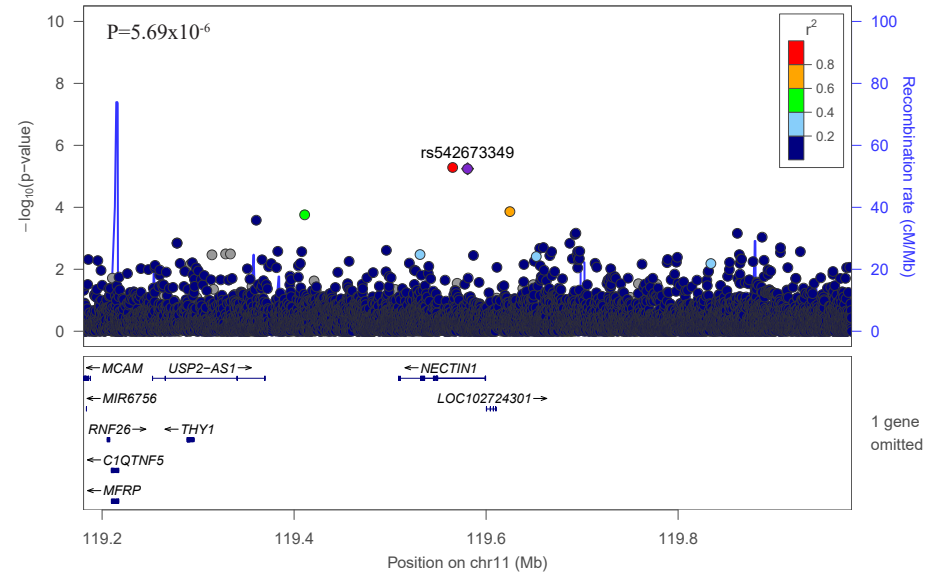

LUSCC : NECTIN1 – Asian

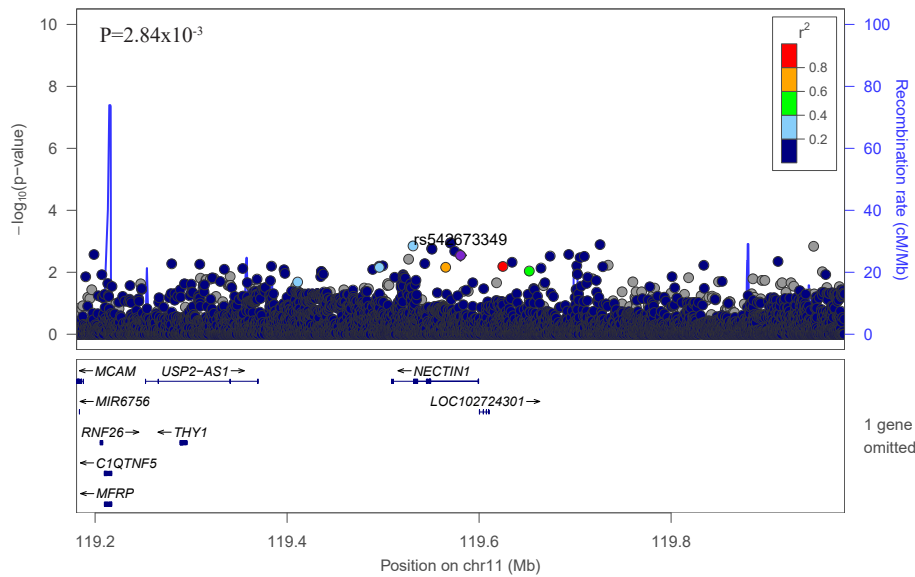

LUSCC : NECTIN1 – African

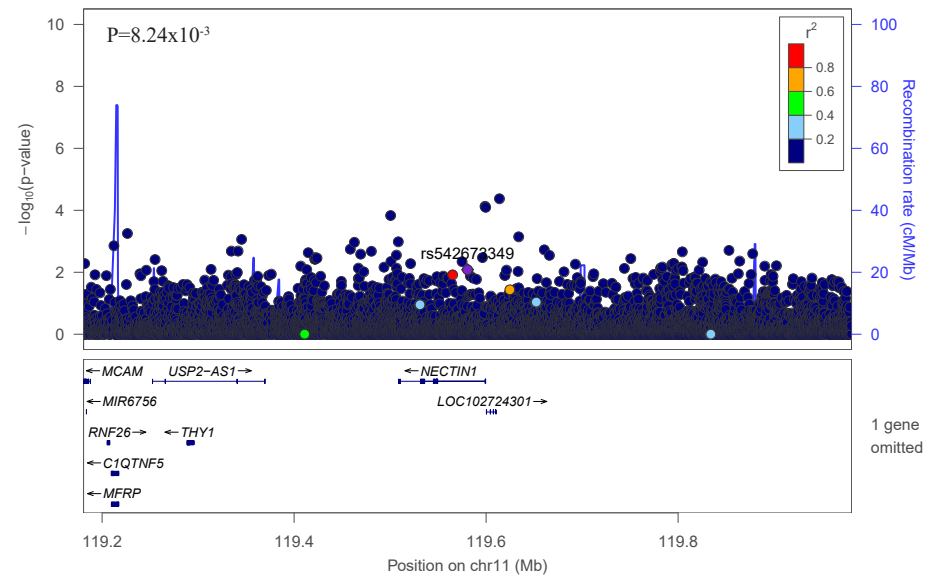

Combined – LUSCC : PPP2R5E

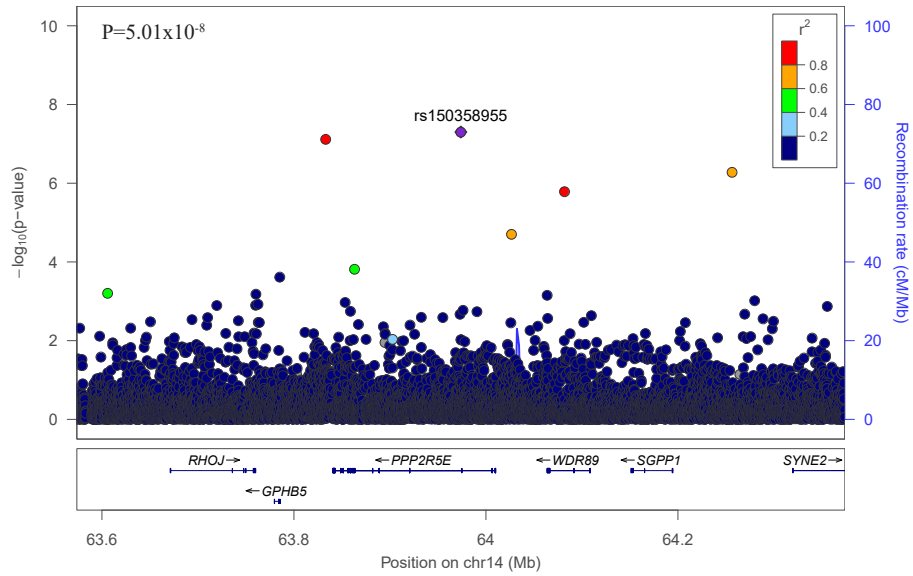

European – LUSCC : PPP2R5E

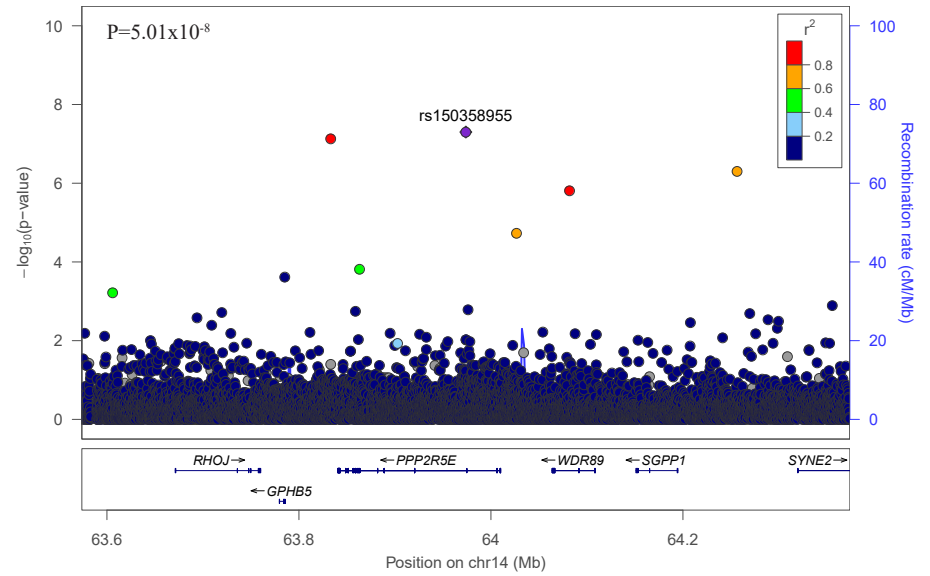

Asian – LUSCC : PPP2R5E

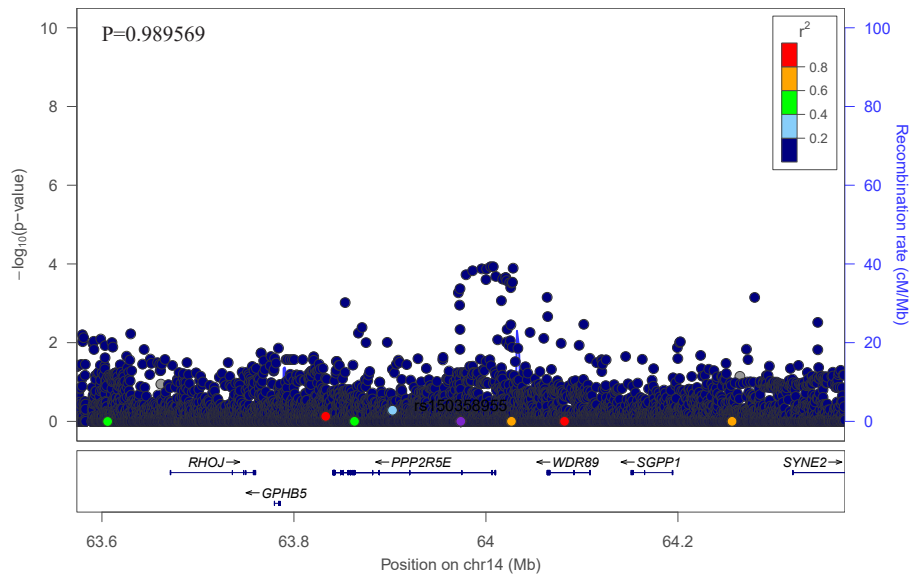

African – LUSCC : PPP2R5E

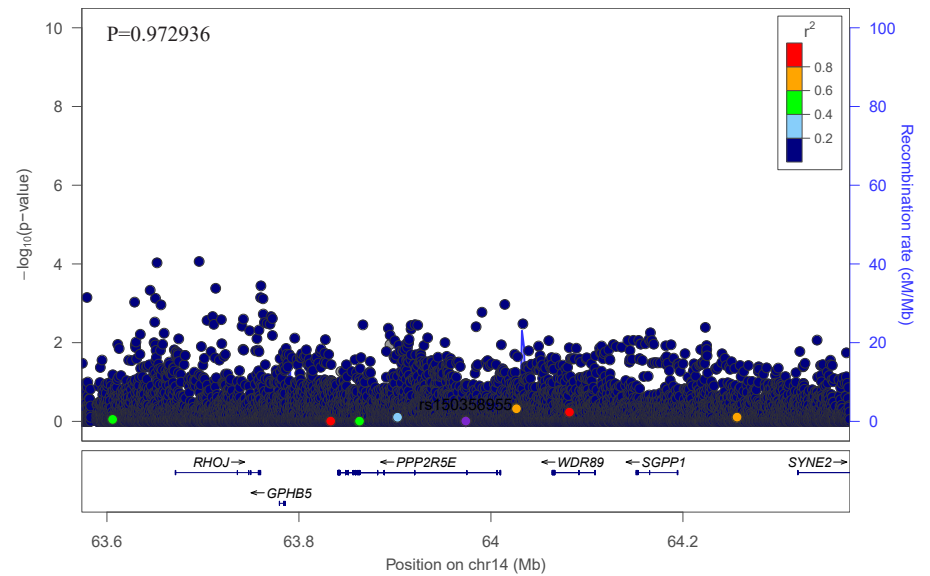

LUSCC : RORA – Combined

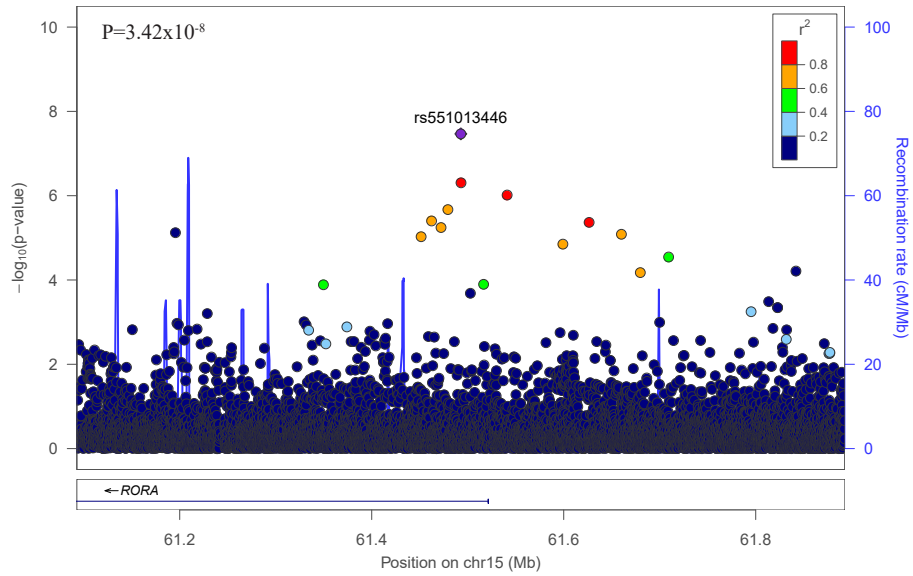

LUSCC : RORA – European

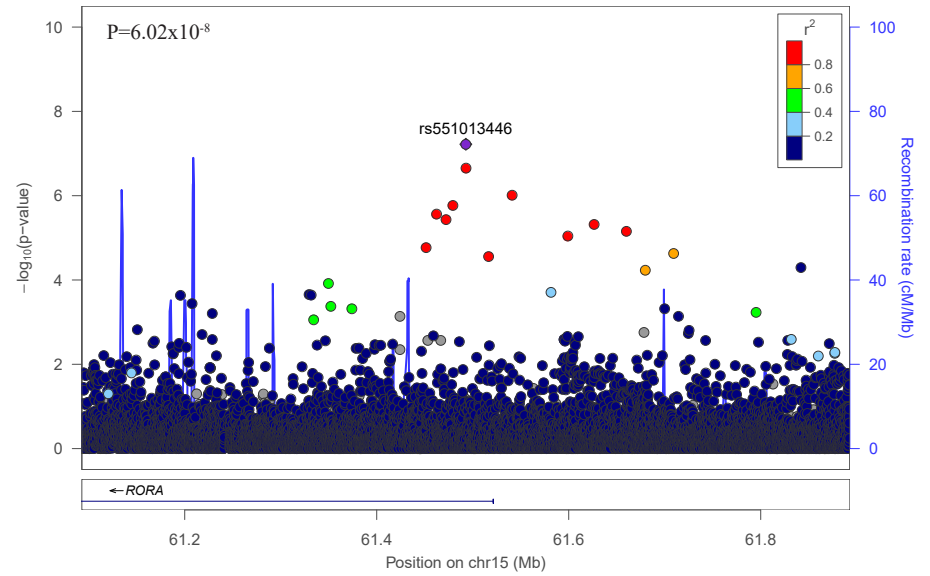

LUSCC : RORA – Asian

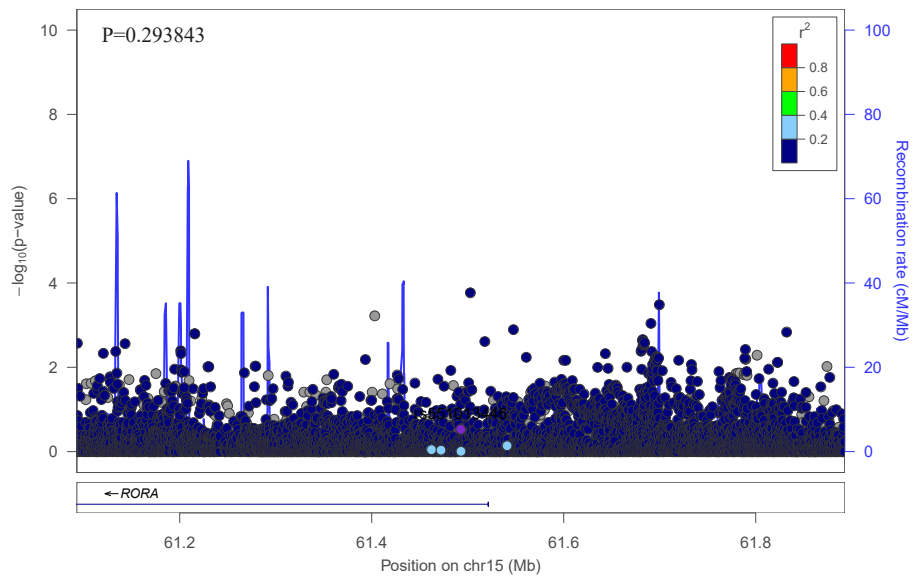

LUSCC : RORA – African

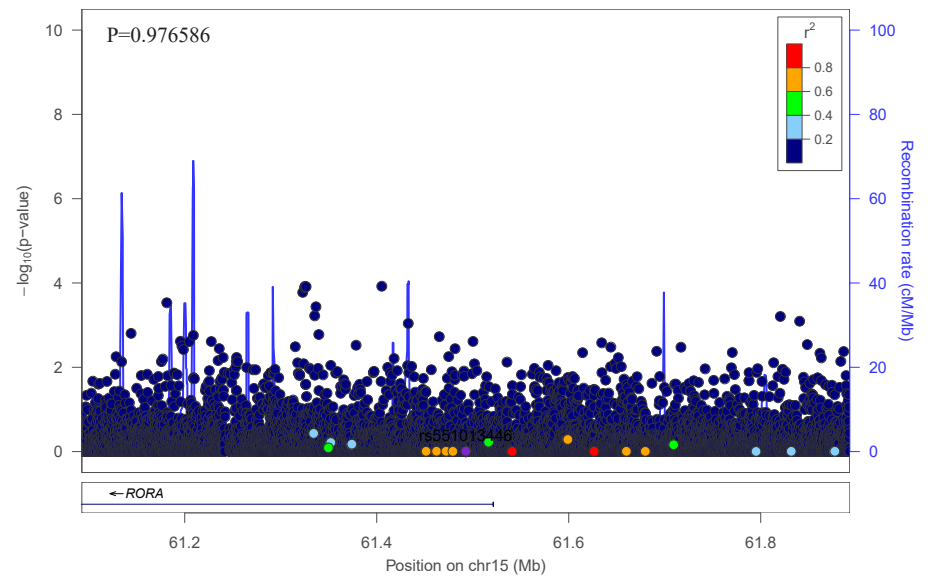

LUSCC : MEX3C\_LINC01630 – Combined

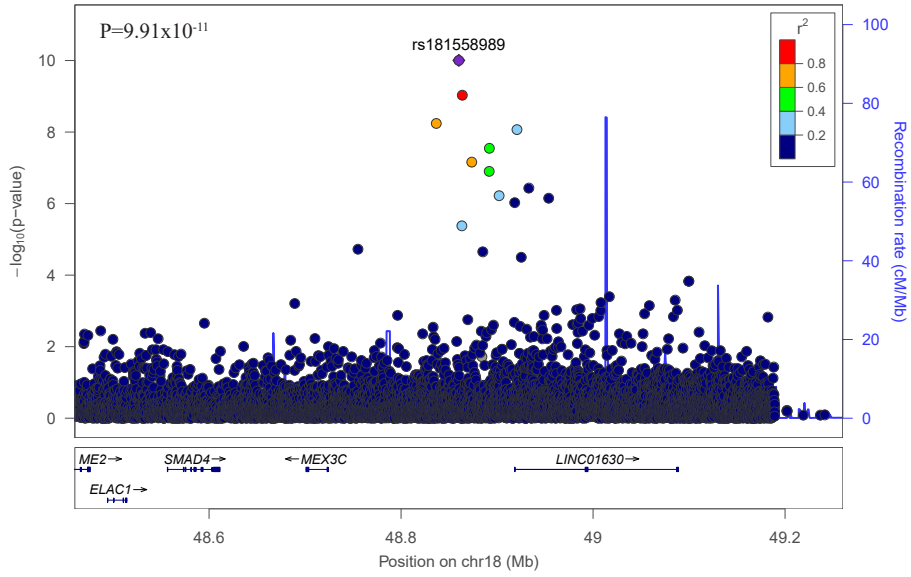

LUSCC : MEX3C\_LINC01630 – European

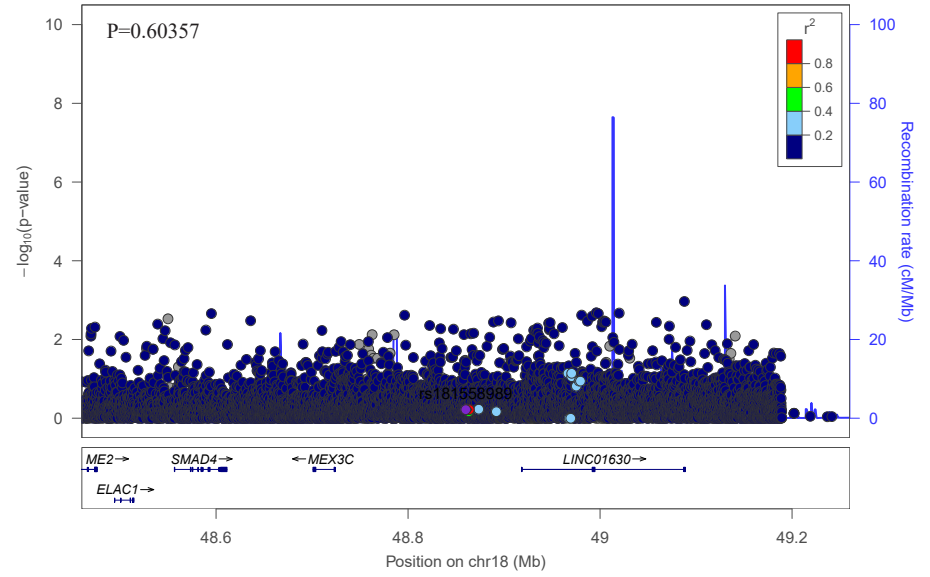

LUSCC : MEX3C\_LINC01630 – Asian

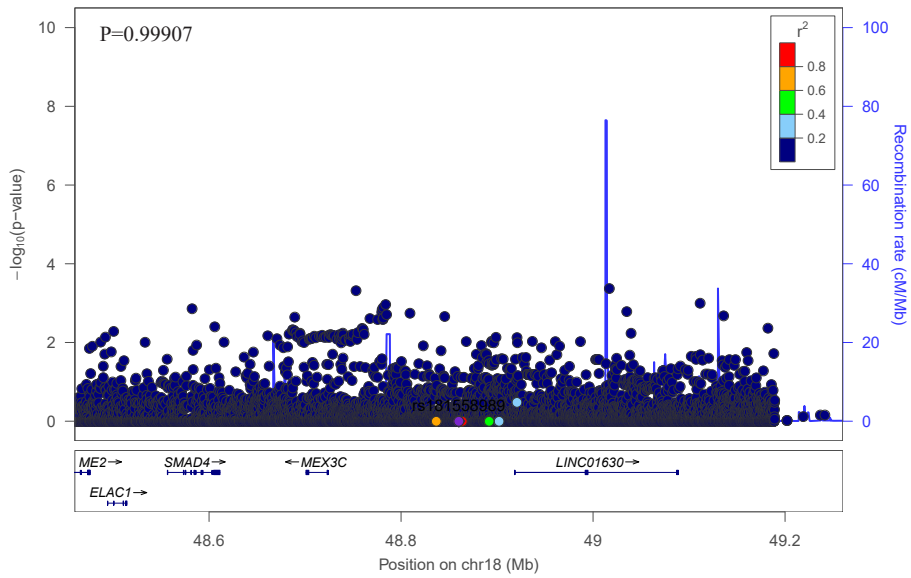

LUSCC : MEX3C\_LINC01630 – African

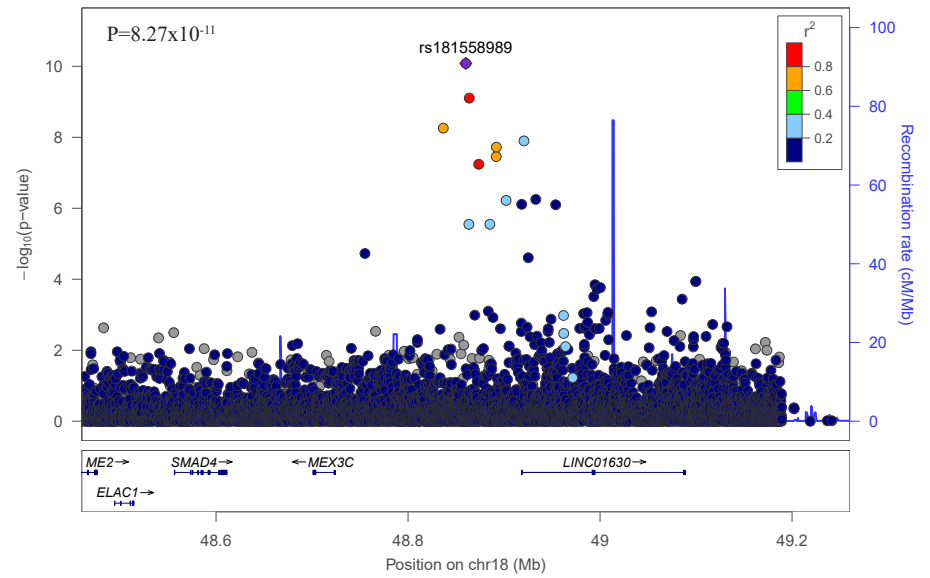

LUSCC : CALR3 – Combined

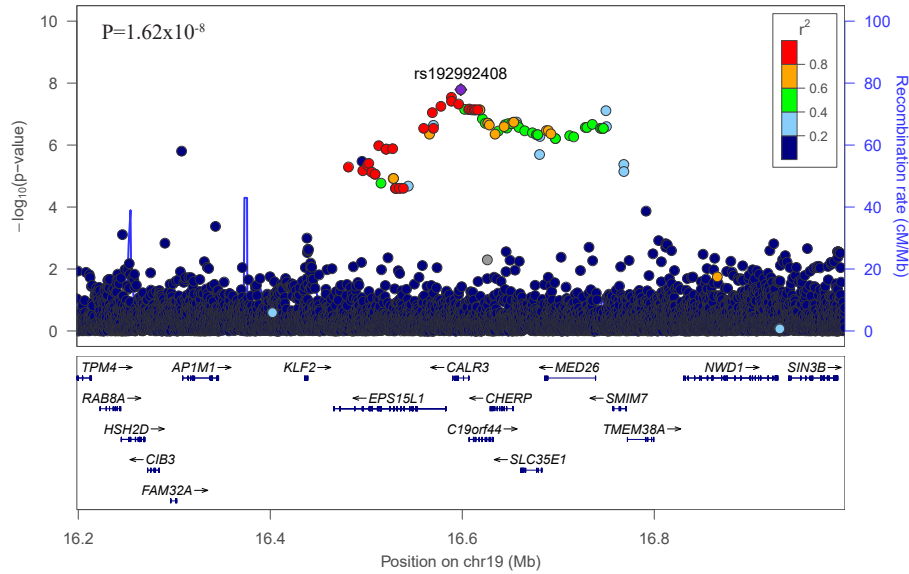

LUSCC : CALR3 – European

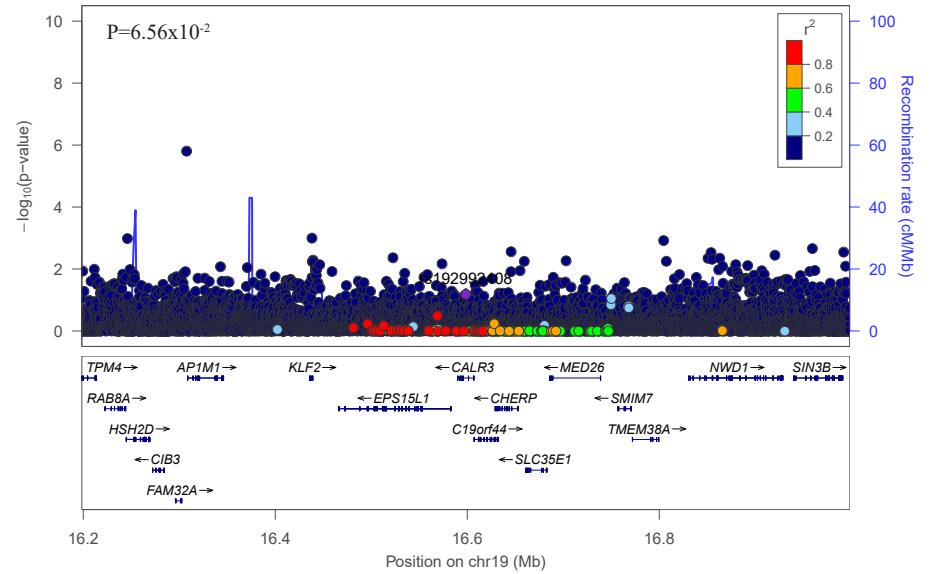

LUSCC : CALR3 – Asian

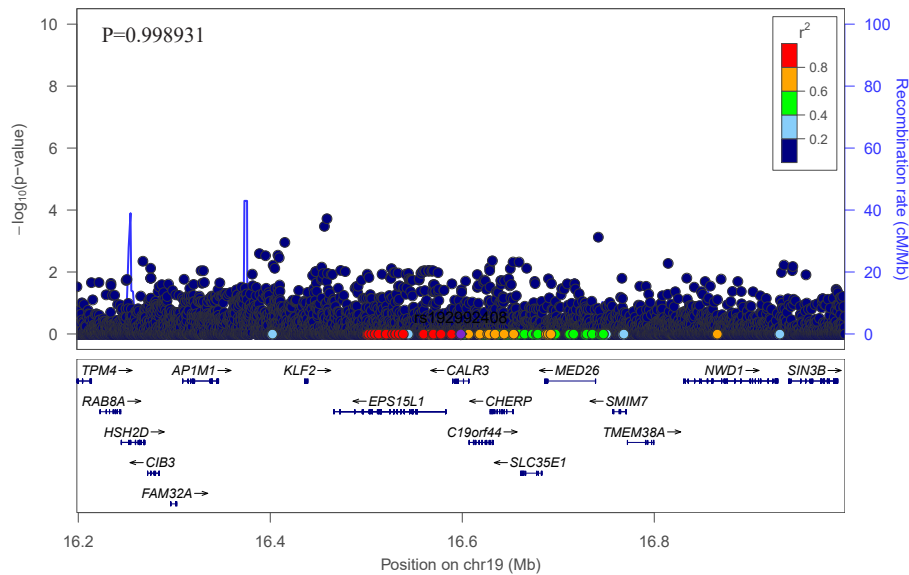

LUSCC : CALR3 – African

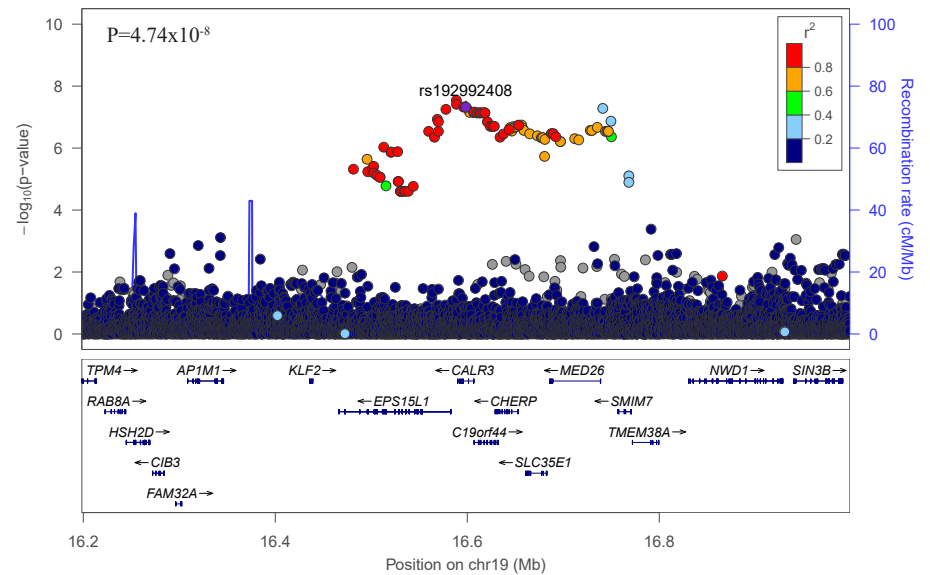



LUSCC : LINC01441\_CBLN4 – Combined

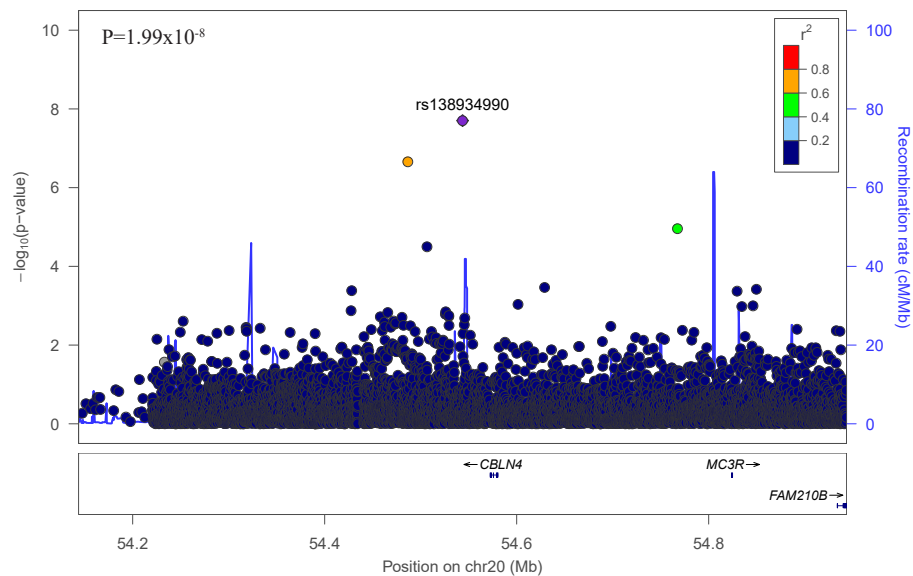

LUSCC : LINC01441\_CBLN4 – European

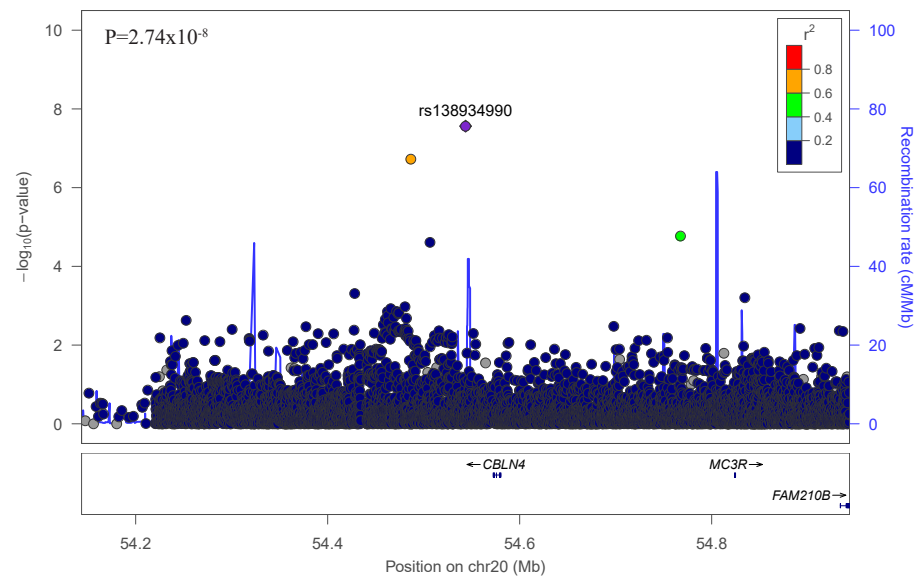

LUSCC : LINC01441\_CBLN4 – Asian

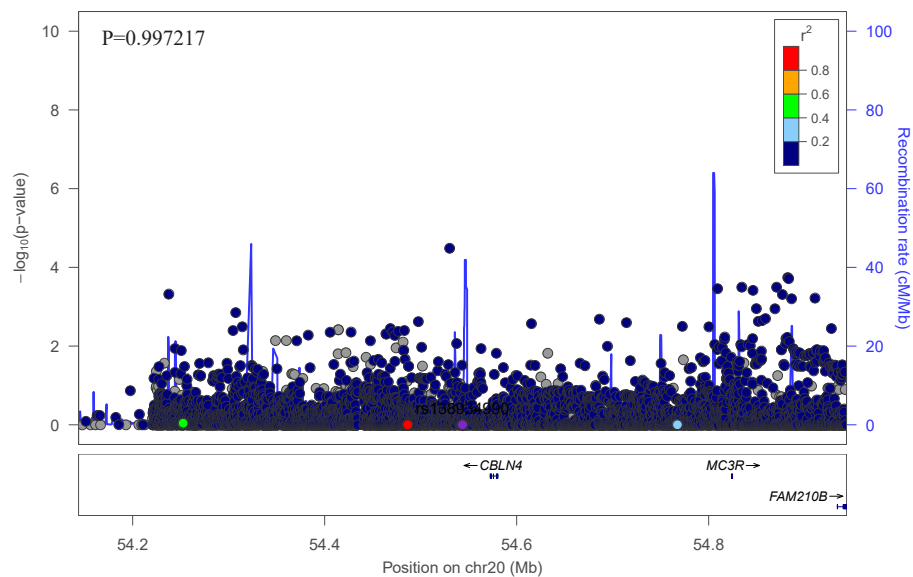

LUSCC : LINC01441\_CBLN4 – African

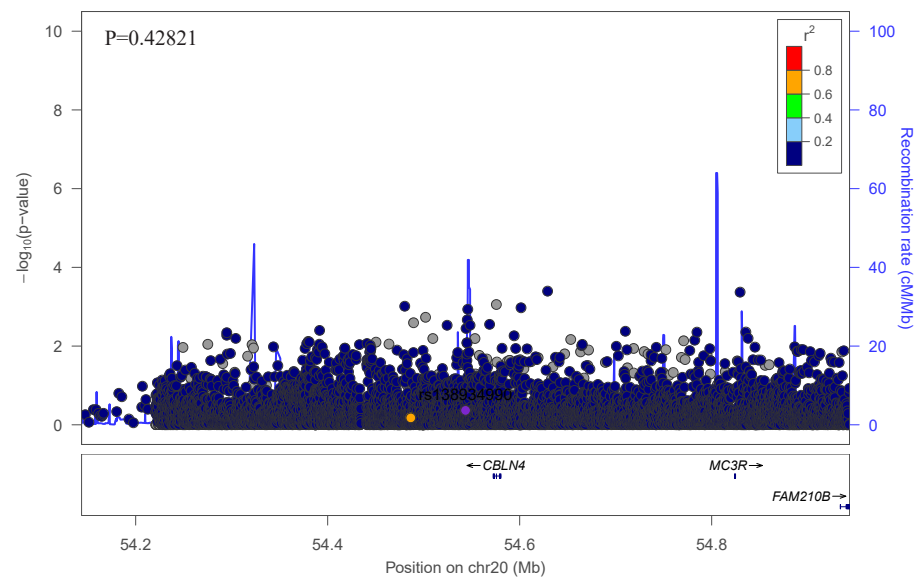

**Title:** Trans-ethnic genome-wide meta-analysis of 35,732 cases and 34,424 controls identifies novel genomic cross-ancestry loci contributing to lung cancer susceptibility

# Supplementary Figure 3 Genomic Regional Plots from Conditional Analysis

## Model : Analyses by Race and then meta-analysis

|       | SNP        | chr:pos       | Conditioning On             | Conditional Pvalue | GENE               | Pvalue before conditioning |
|-------|------------|---------------|-----------------------------|--------------------|--------------------|----------------------------|
| step0 | rs2853677  | 5:1287194:G:A | No condition                |                    | TERT;Known variant | 2.91E-50                   |
| step1 | rs31487    | 5:1341101:G:C | rs2853677                   | 9.87E-31           | CLPTM1L            | 1.53E-41                   |
| step2 | rs13167280 | 5:1280477:G:A | rs2853677;rs3148            | 8.82E-11           | TERT               | 5.17E-23                   |
| step3 | rs7705526  | 5:1285974:C:A | rs2853677;rs3148;rs13167280 | 1.23E-05           | TERT;Known variant | 4.83E-38                   |

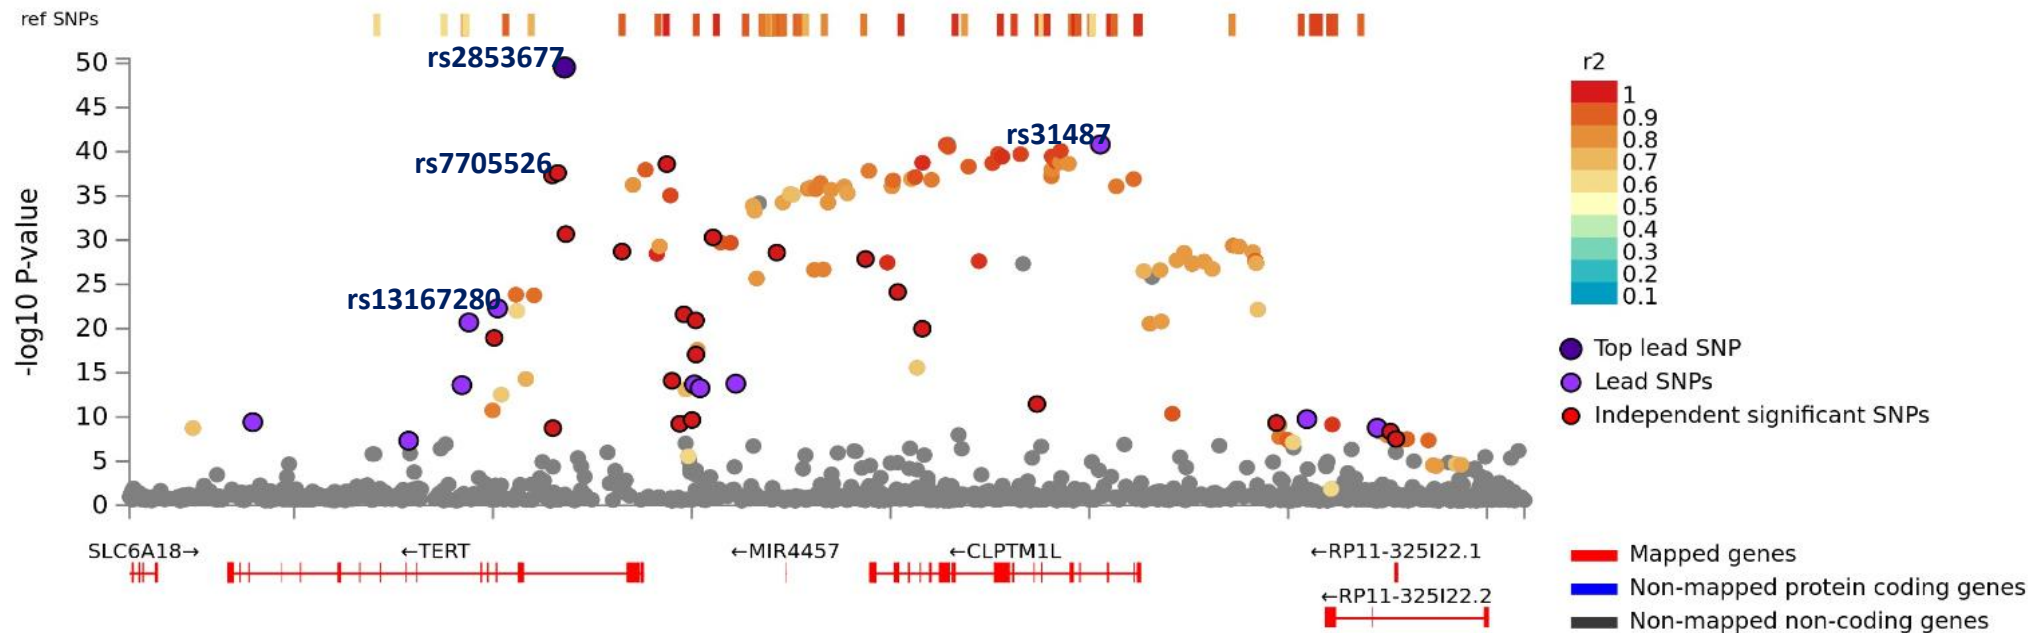

**A** Lung : TERT – Combined

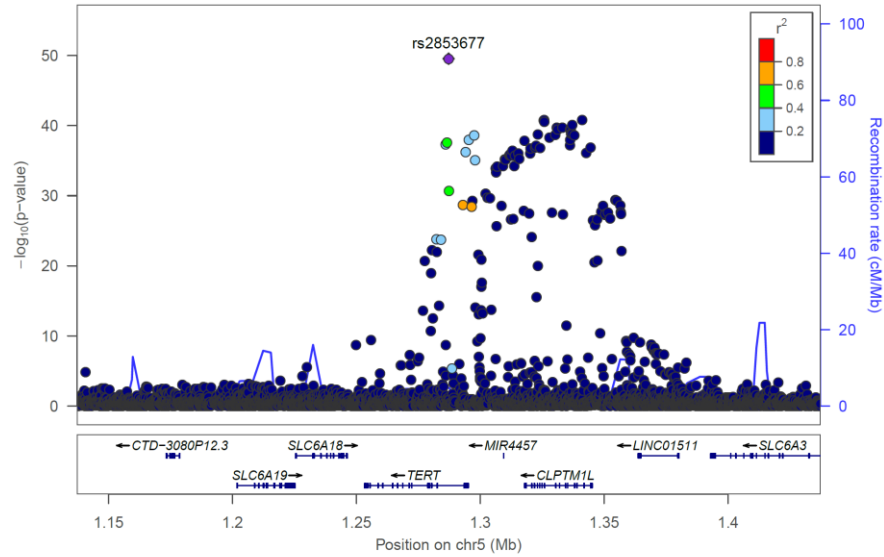

**B** Lung : TERT – Combined

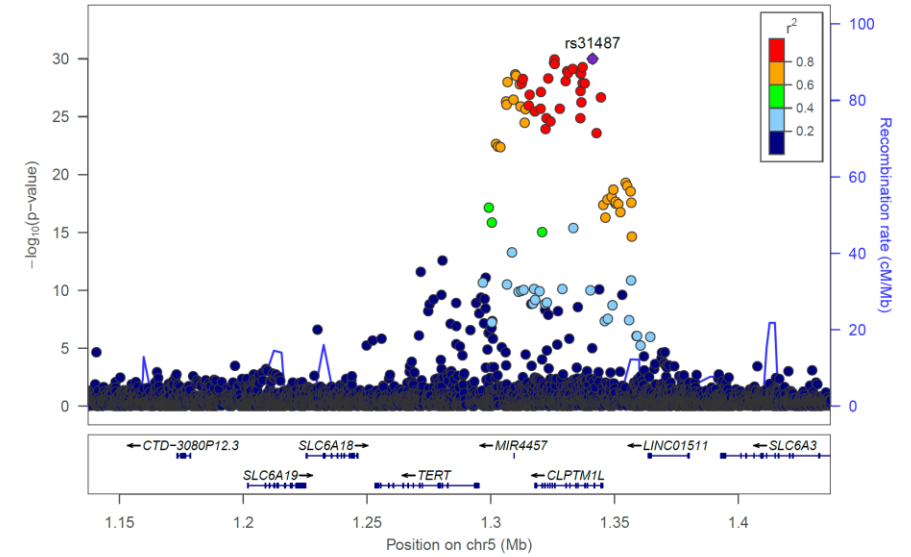

**C** Lung : TERT – Combined

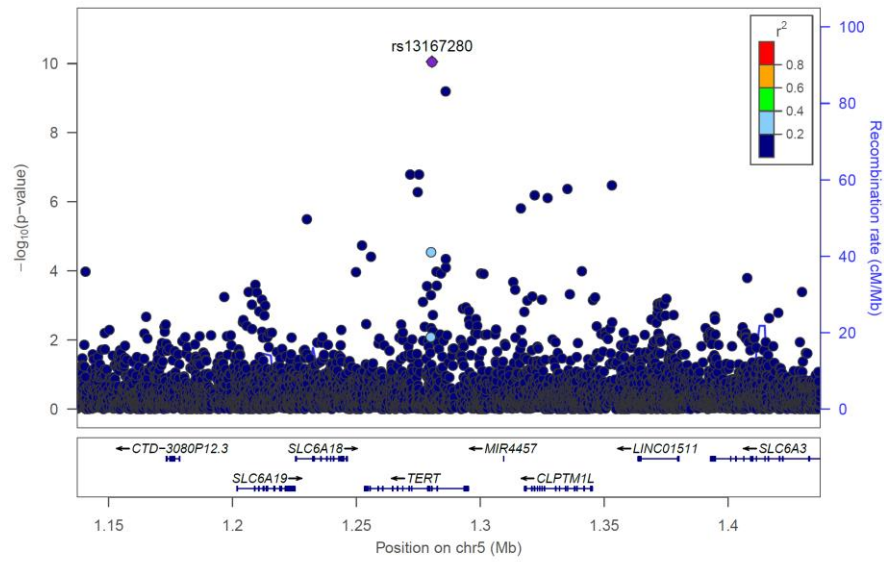

**A : Before Conditioning**  
**B : After Conditioned rs2853677**  
**C : After Conditioned rs2853677, rs31487**  
**Note : Conditioned 1Mb loci**

**A** Lung : TERT – European

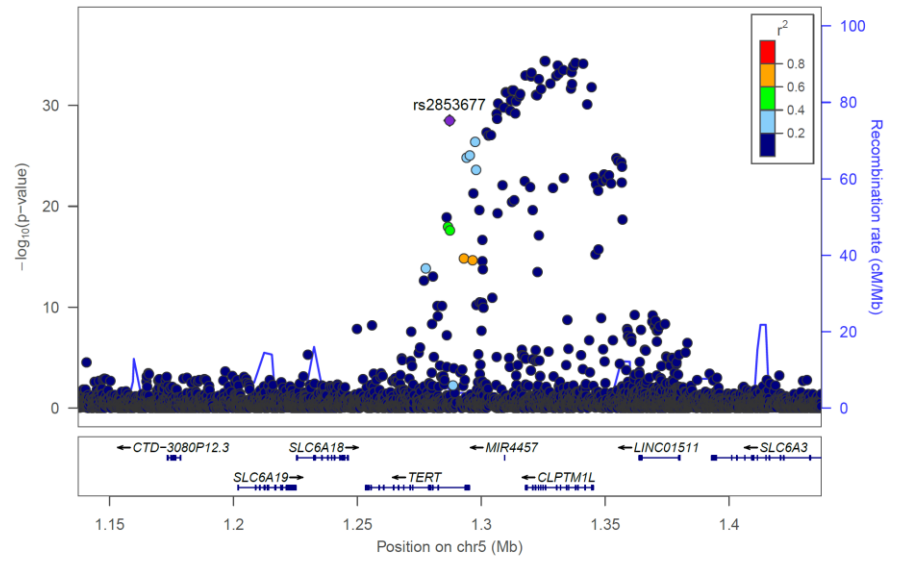

**B** Lung : TERT – European

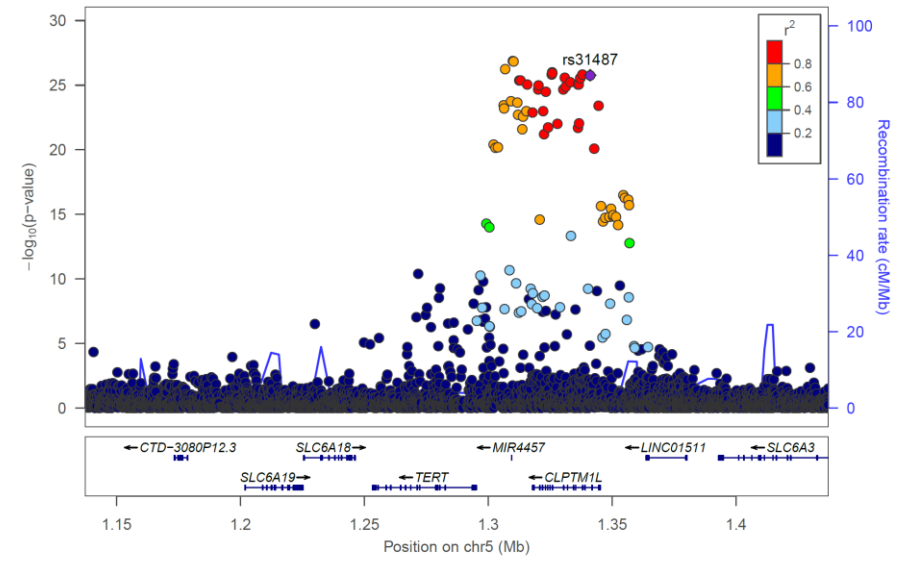

**C** Lung : TERT – European

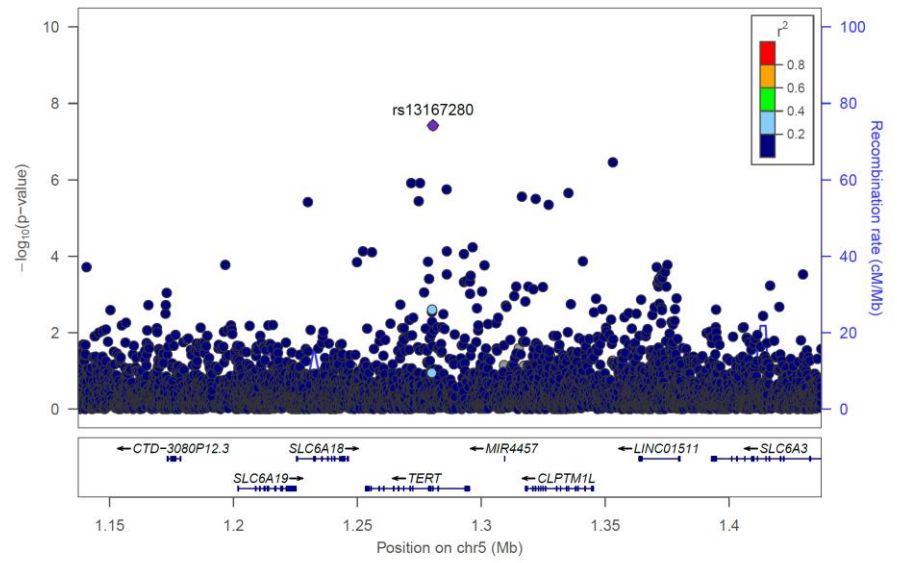

**A : Before Conditioning**  
**B : After Conditioned rs2853677**  
**C : After Conditioned rs2853677, rs31487**  
**Note : Conditioned 1Mb loci**

A

Lung : TERT – Asian

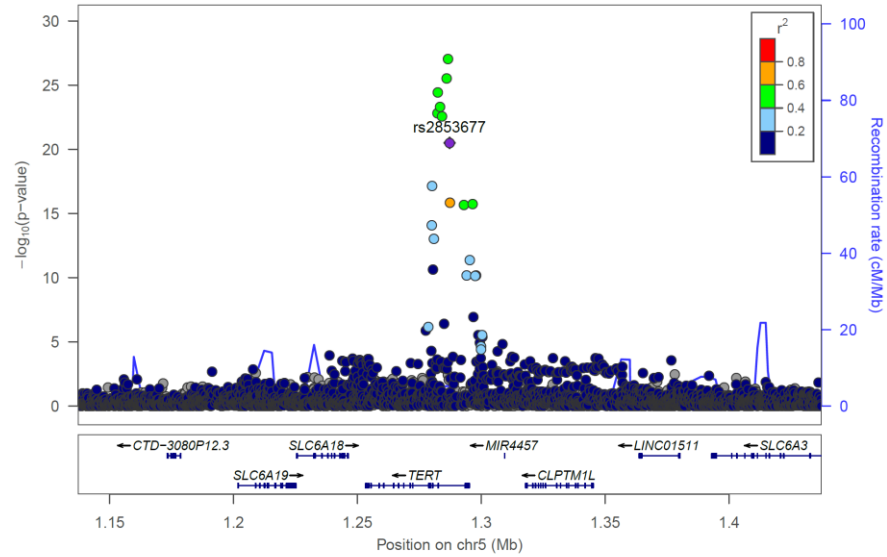

B

Lung : TERT – Asian

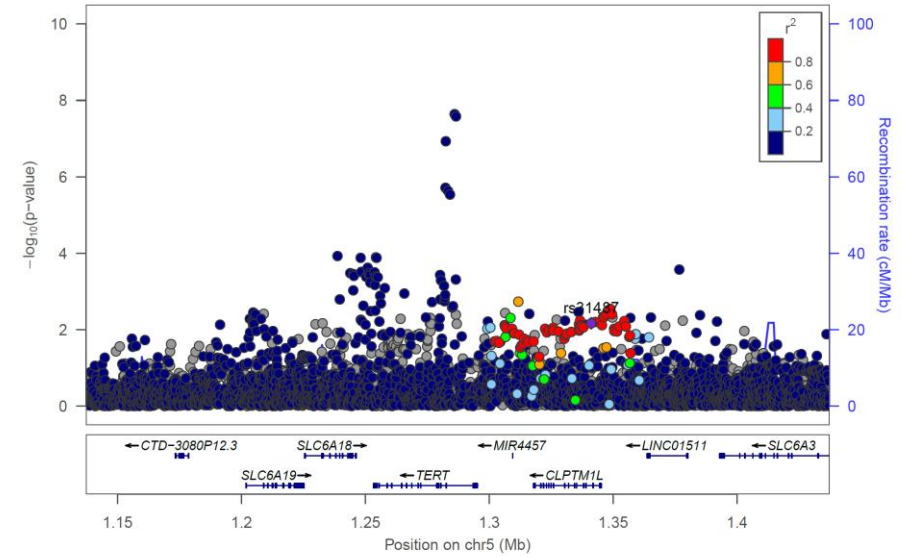

C

Lung : TERT – Asian

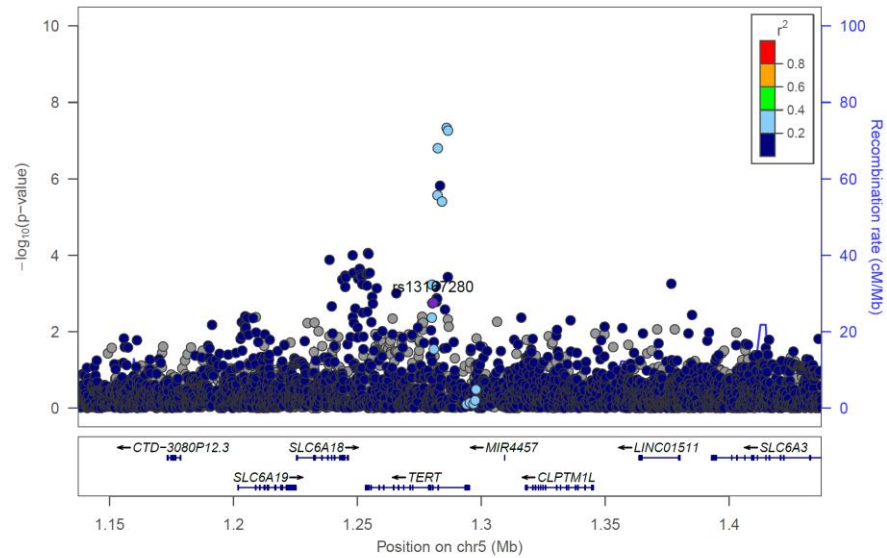

A : Before Conditioning

B : After Conditioned rs2853677

C : After Conditioned rs2853677, rs31487

Note : Conditioned 1Mb loci

A

Lung : TERT – African

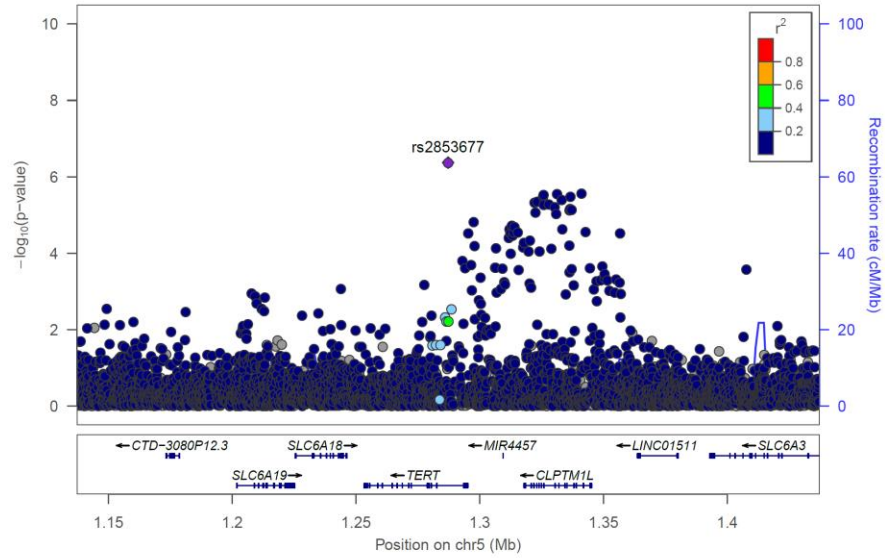

B

Lung : TERT – African

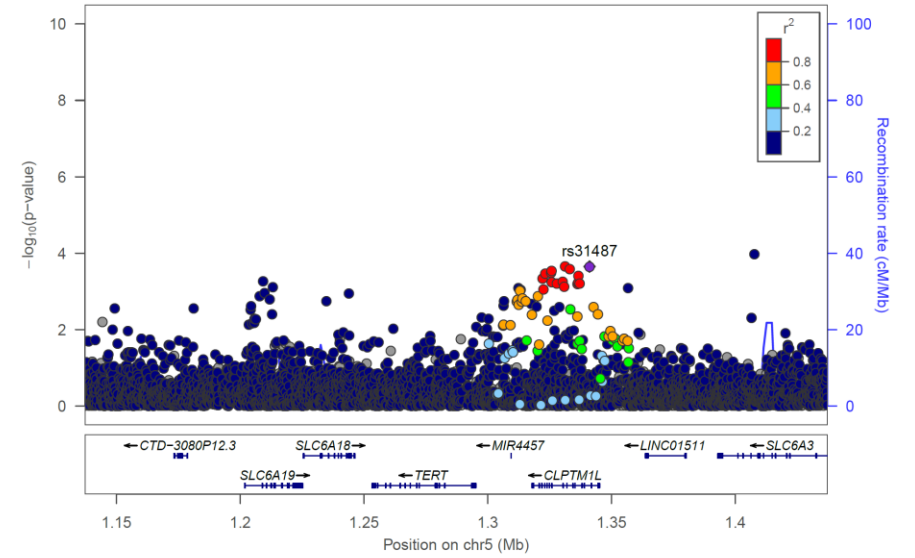

C

Lung : TERT – African

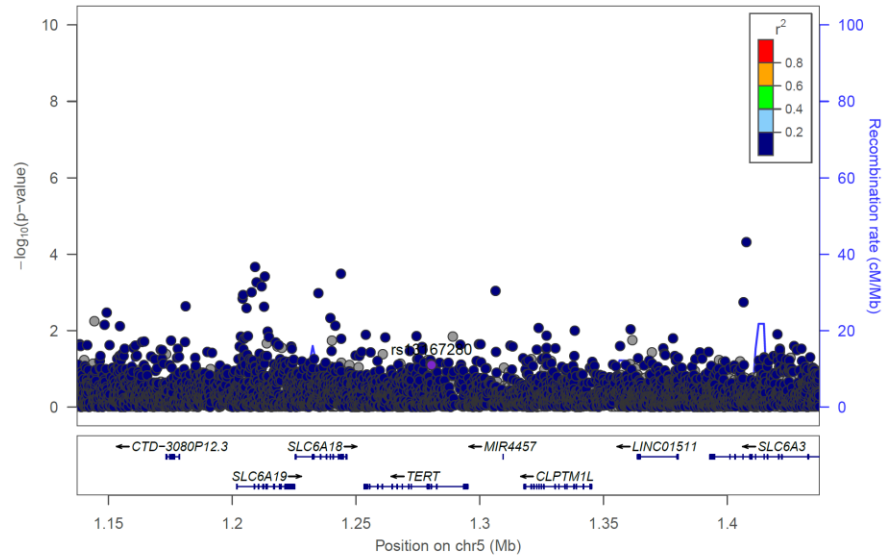

**A : Before Conditioning**

**B : After Conditioned rs2853677**

**C : After Conditioned rs2853677, rs31487**

**Note : Conditioned 1Mb loci**

**Title:** Trans-ethnic genome-wide meta-analysis of 35,732 cases and 34,424 controls identifies novel genomic cross-ancestry loci contributing to lung cancer susceptibility

# Supplementary Figure 4 eQTL analysis of *IRF4* using GTEx/v8



# IRF (Interferon Regulatory Factor 4)

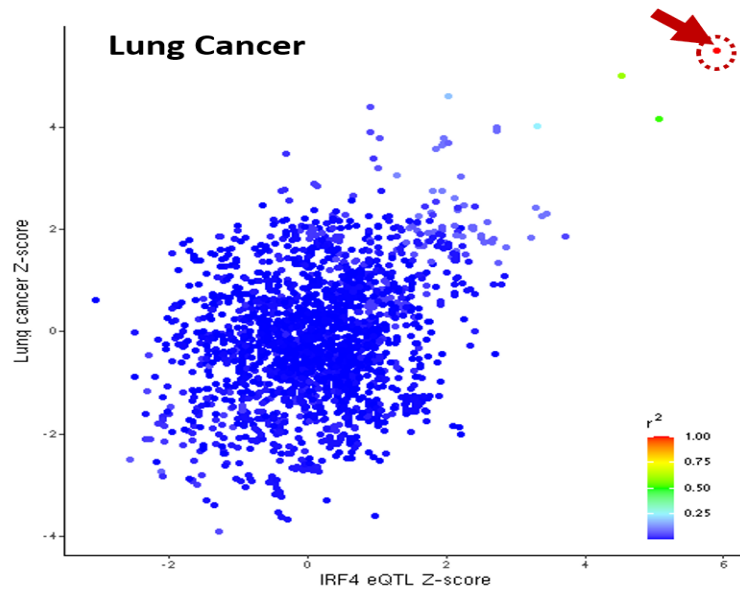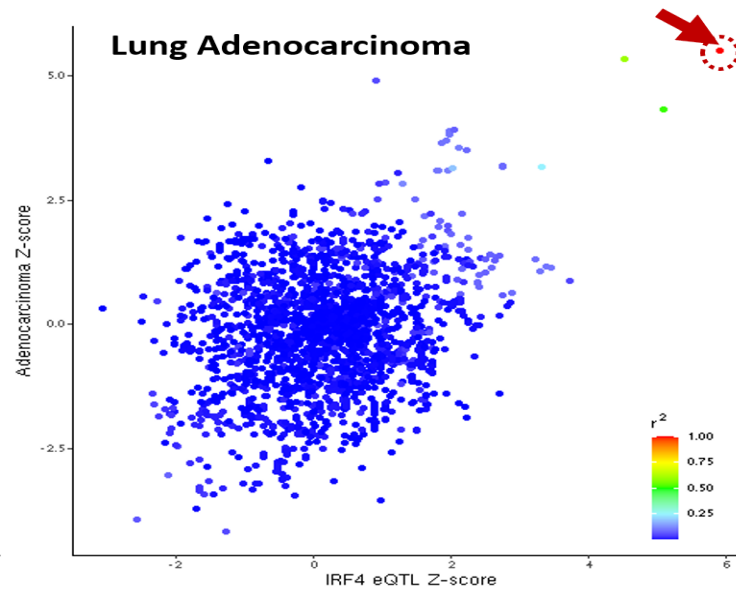

IRF4 (ENSG00000137265)

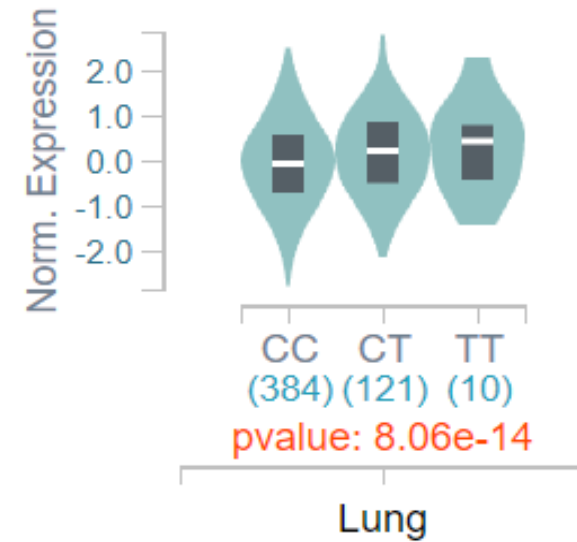

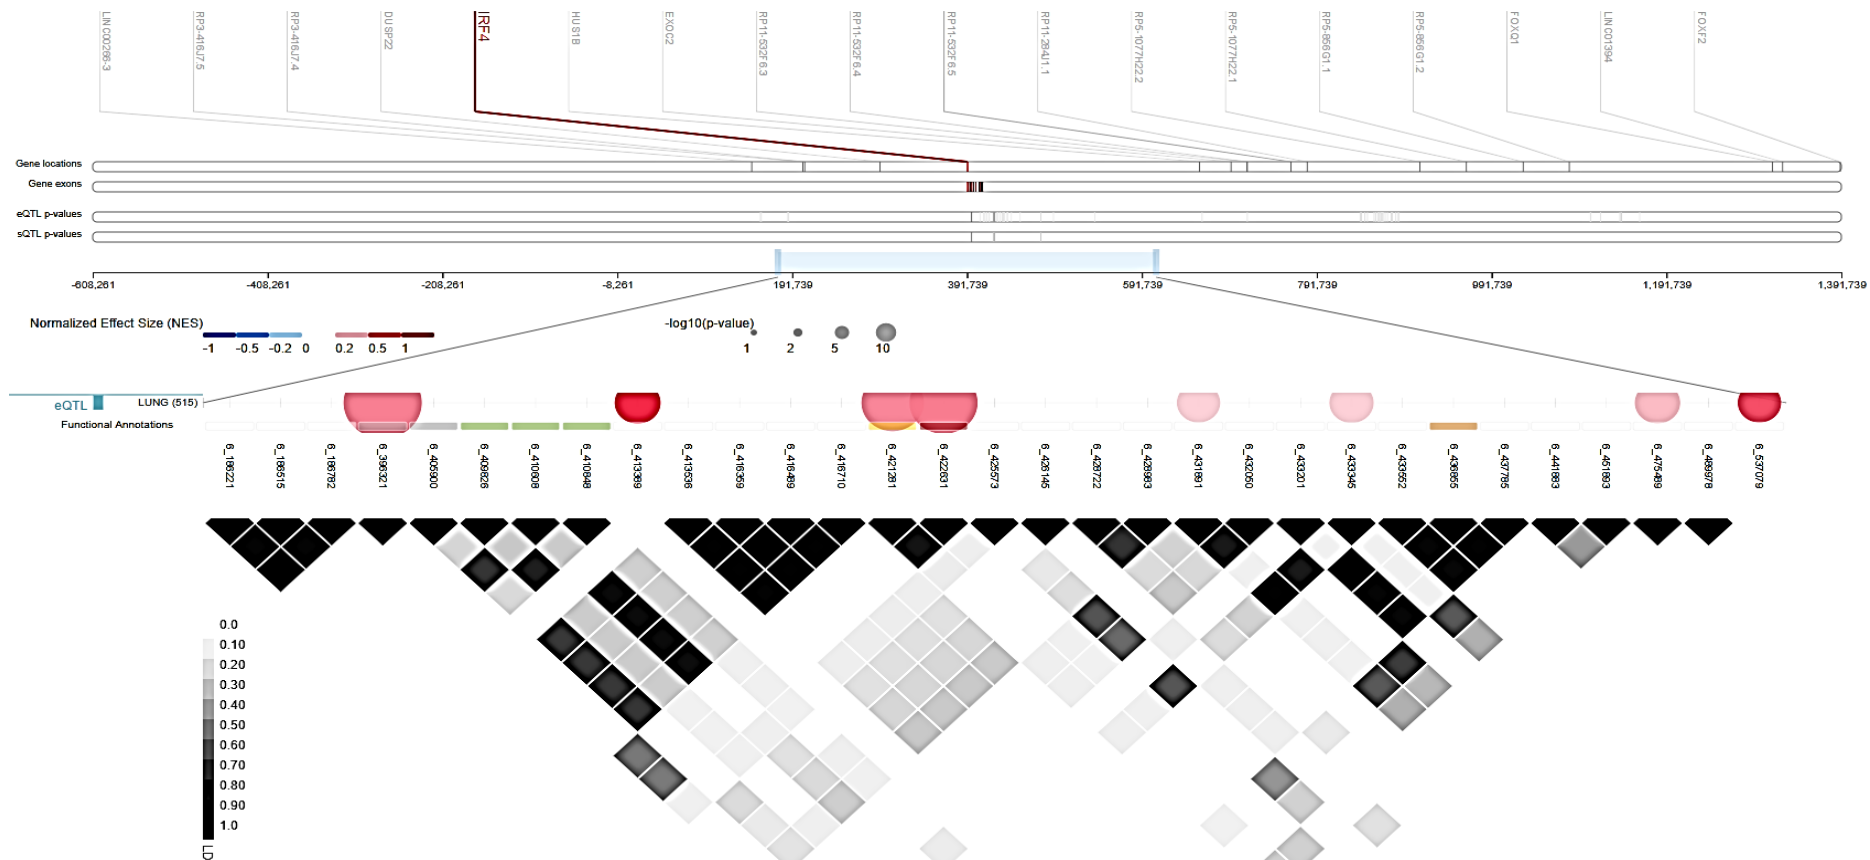

Query Gene: IRF4 (ENSG00000137265.14), undefined  
 Gene Location: chr6:391739 - 411447 (+)  
 Total eQTLs: 103  
 Total sQTLs: 4

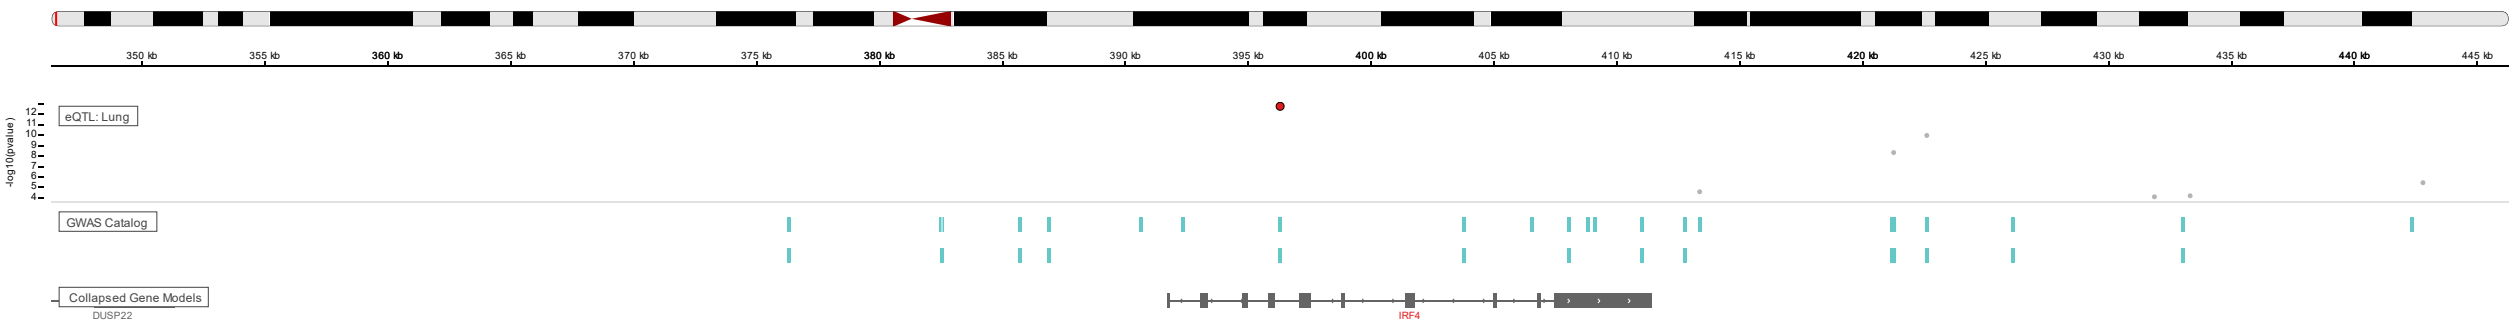

Isoform Expression of IRF4: ENSG00000137265.14 interferon regulatory factor 4 [Source:HGNC Symbol;Acc:HGNC:6119]

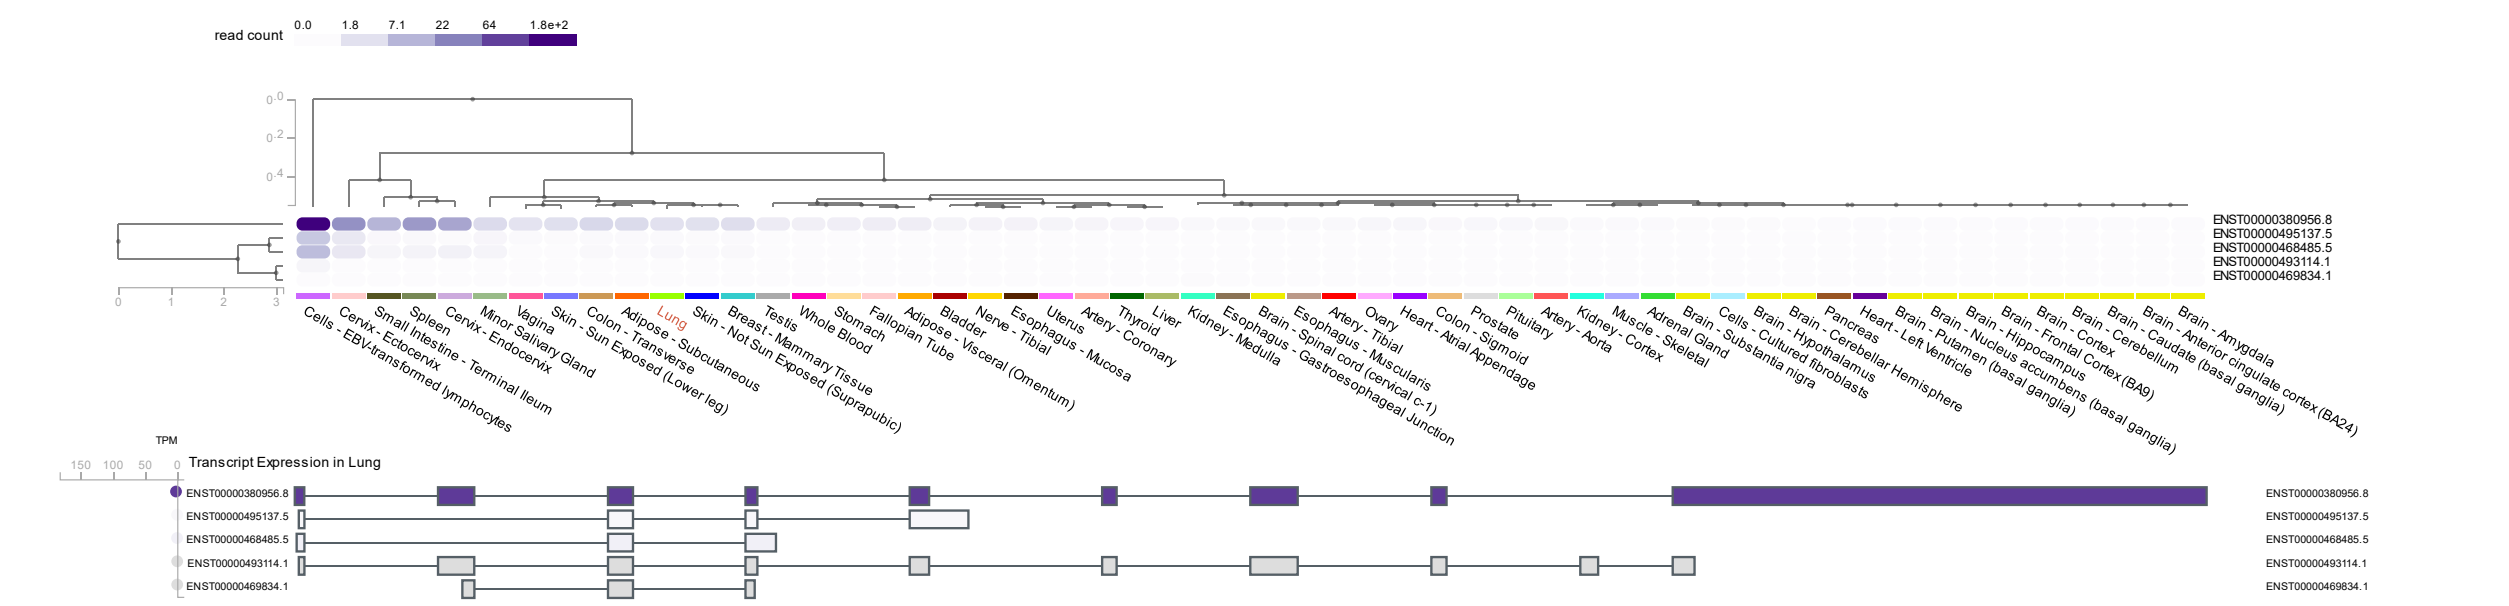

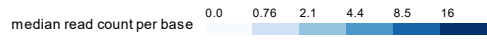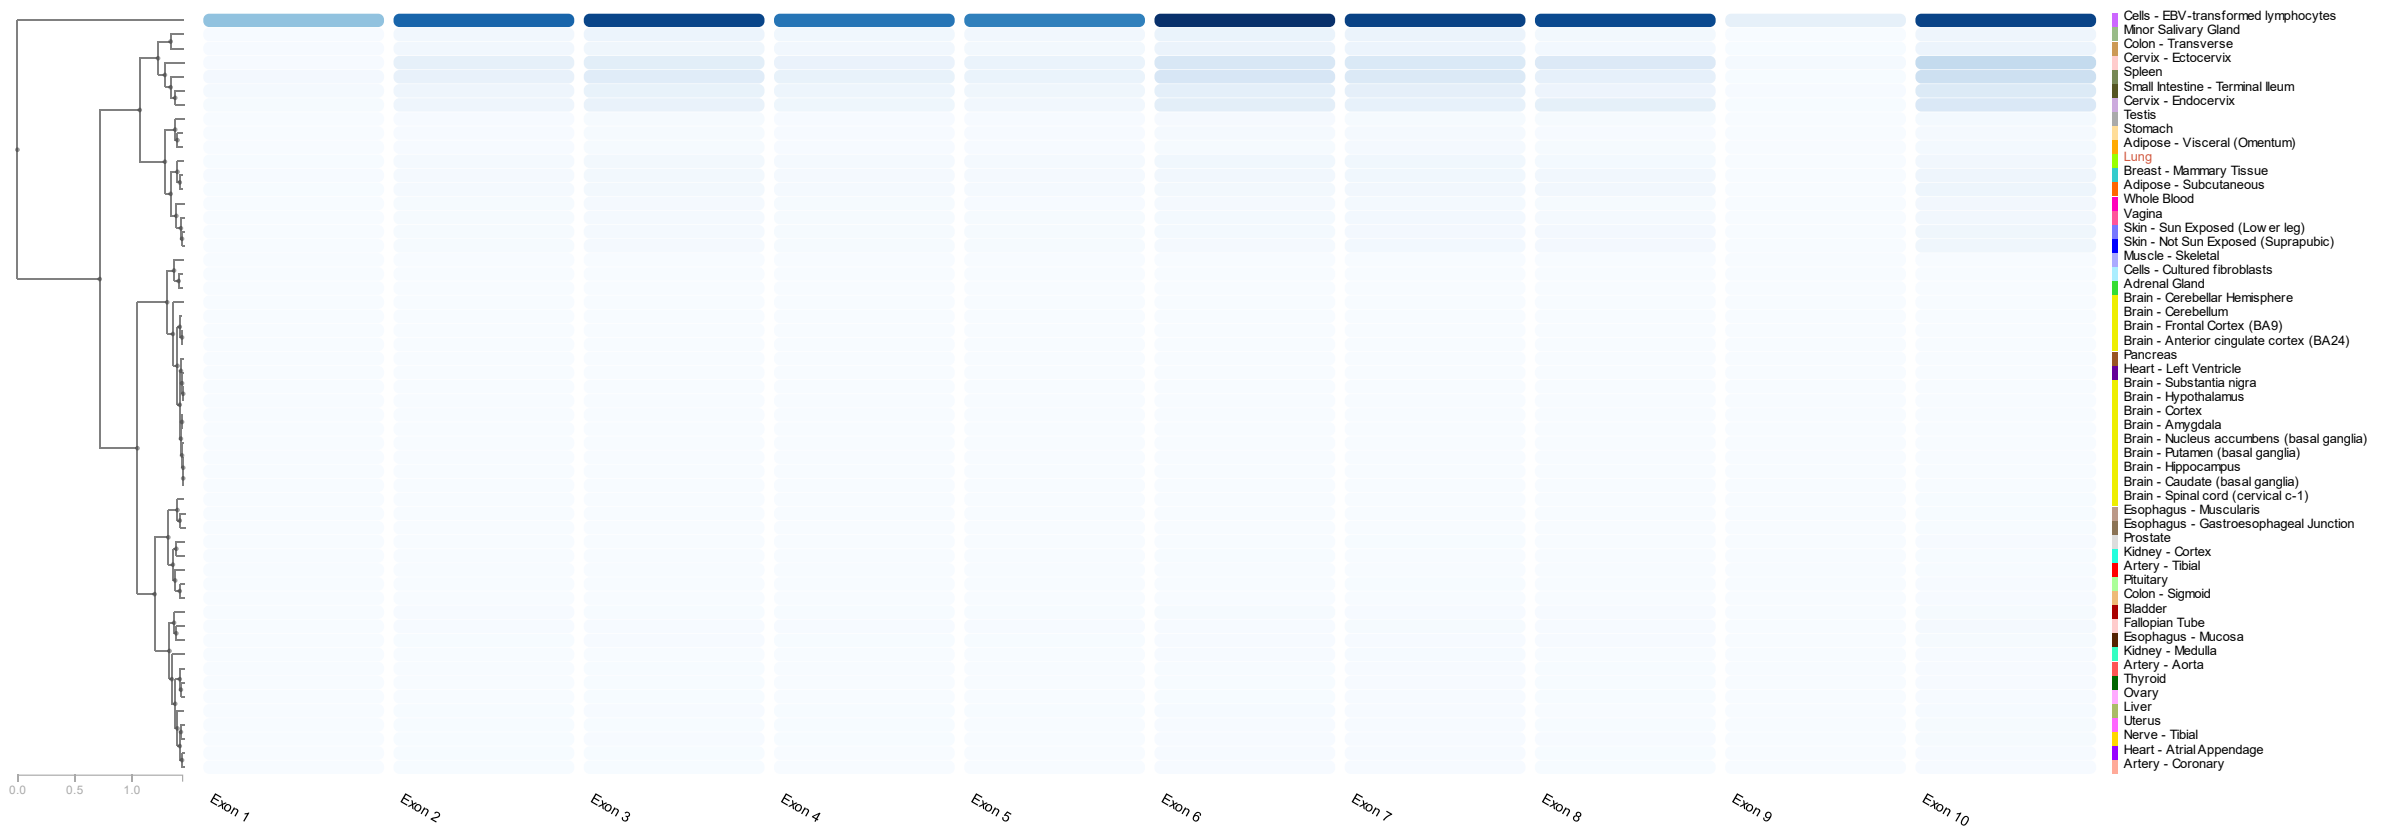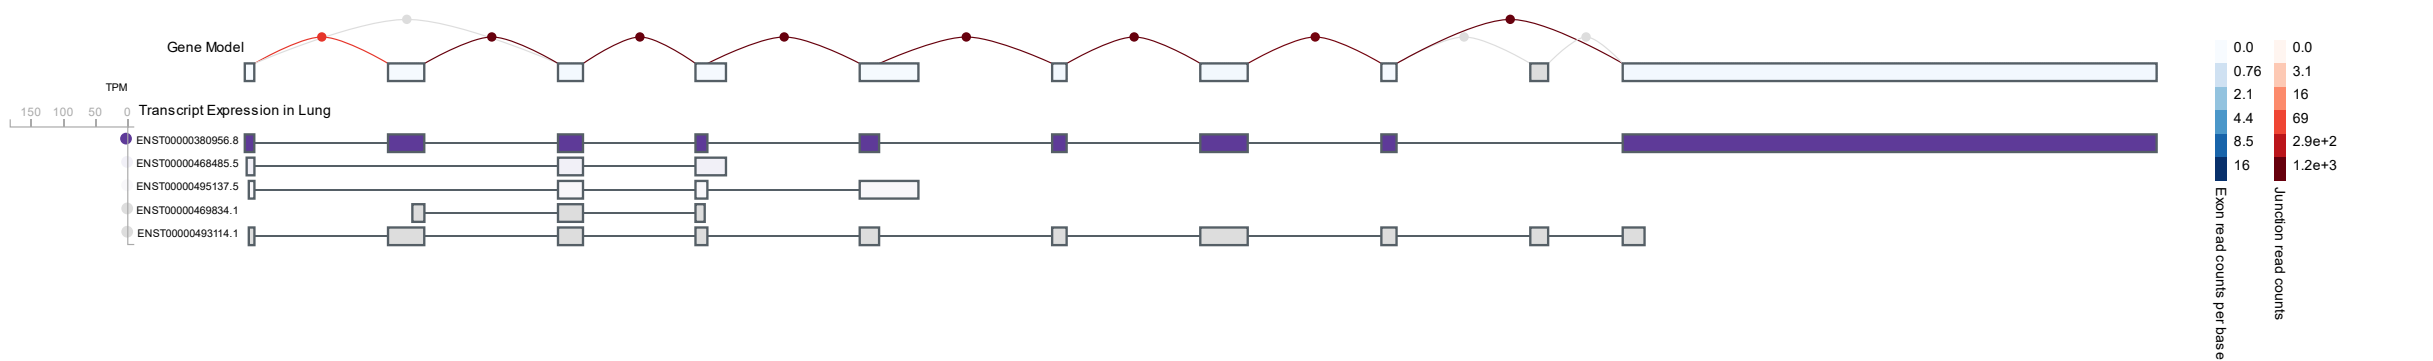

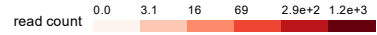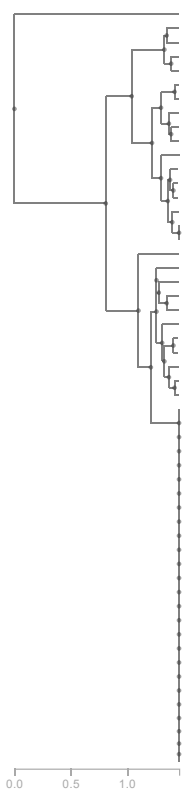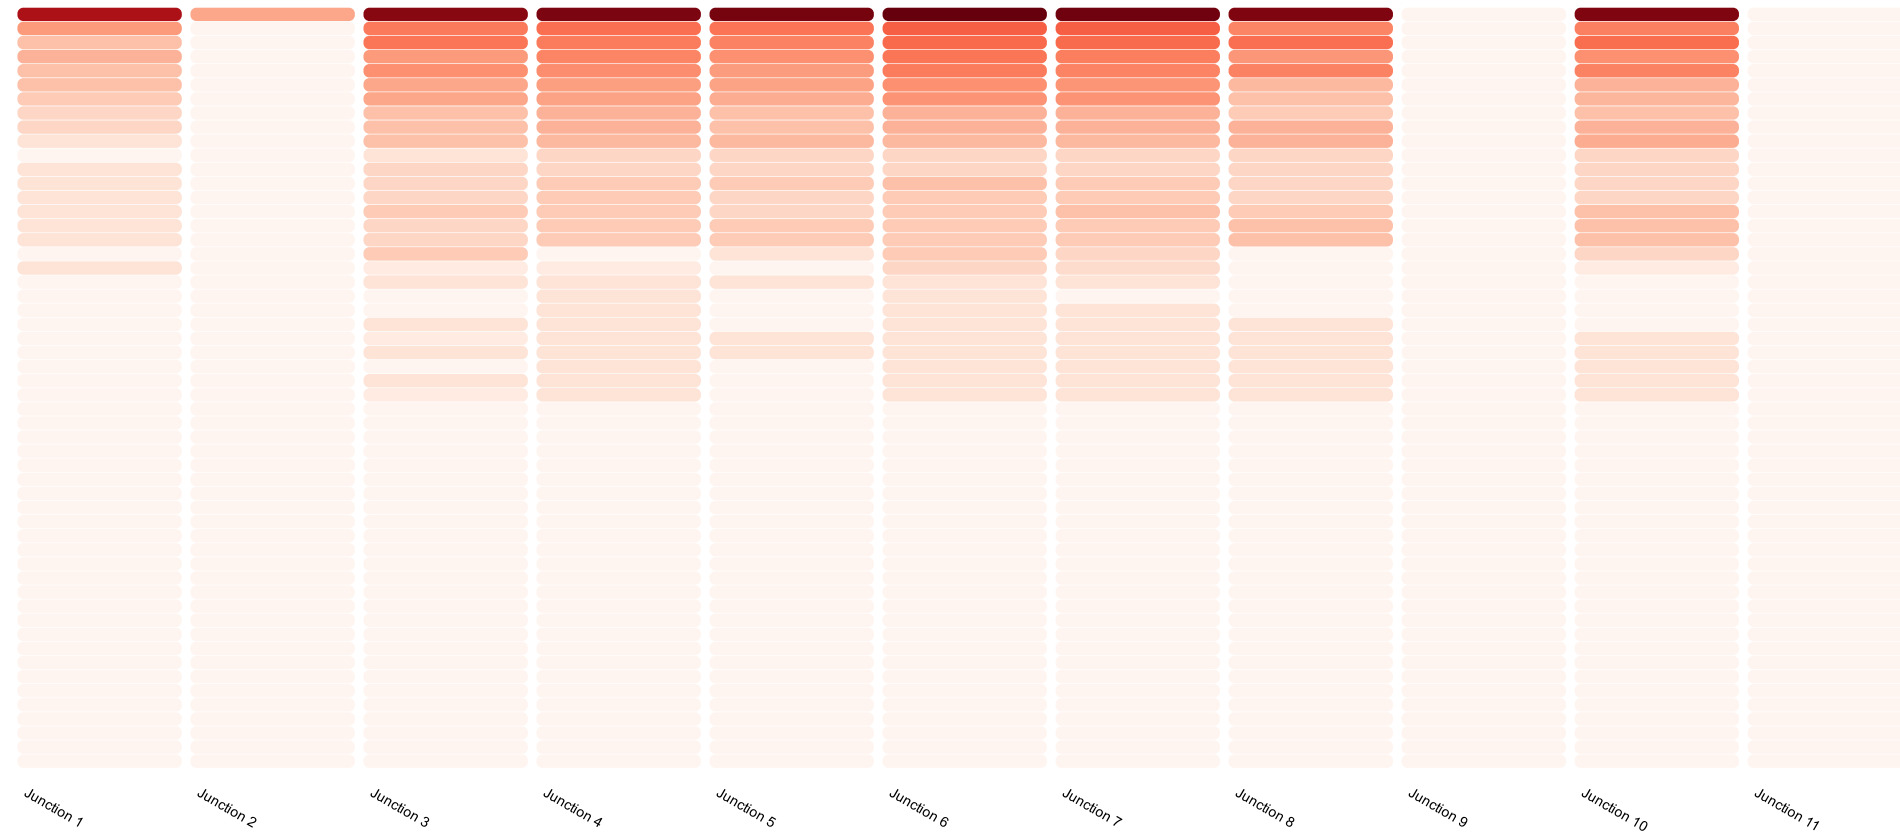

- Cells - EBV-transformed lymphocytes
- Spleen
- Cervix - Ectocervix
- Small Intestine - Terminal Ileum
- Cervix - Endocervix
- Minor Salivary Gland
- Colon - Transverse
- Lung
- Breast - Mammary Tissue
- Adipose - Subcutaneous
- Testis
- Adipose - Visceral (Omentum)
- Whole Blood
- Stomach
- Vagina
- Skin - Sun Exposed (Lower leg)
- Skin - Not Sun Exposed (Suprapubic)
- Fallopian Tube
- Kidney - Medulla
- Liver
- Thyroid
- Ovary
- Heart - Atrial Appendage
- Uterus
- Esophagus - Mucosa
- Bladder
- Nerve - Tibial
- Artery - Coronary
- Prostate
- Pituitary
- Pancreas
- Muscle - Skeletal
- Kidney - Cortex
- Heart - Left Ventricle
- Esophagus - Muscularis
- Esophagus - Gastroesophageal Junction
- Colon - Sigmoid
- Cells - Cultured fibroblasts
- Brain - Substantia nigra
- Brain - Spinal cord (cervical c-1)
- Brain - Putamen (basal ganglia)
- Brain - Nucleus accumbens (basal ganglia)
- Brain - Hypothalamus
- Brain - Hippocampus
- Brain - Frontal Cortex (BA9)
- Brain - Cortex
- Brain - Cerebellum
- Brain - Cerebellar Hemisphere
- Brain - Caudate (basal ganglia)
- Brain - Anterior cingulate cortex (BA24)
- Brain - Amygdala
- Artery - Tibial
- Artery - Aorta
- Adrenal Gland

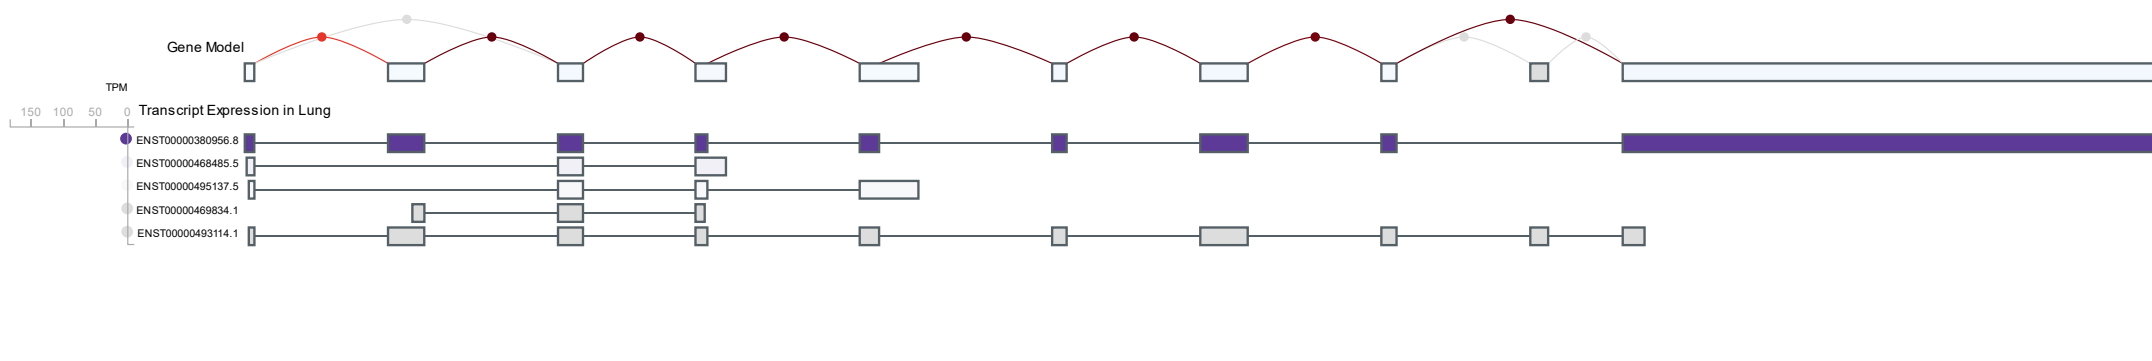

| Tissue                                    | Samples | NES     | p-value | m-value |
|-------------------------------------------|---------|---------|---------|---------|
| Cells - EBV-transformed lymphocytes       | 147     | 0.535   | 6.4e-6  | 1.00    |
| Minor Salivary Gland                      | 144     | 0.431   | 4.8e-5  | 1.00    |
| Testis                                    | 322     | 0.356   | 3.1e-8  | 1.00    |
| Lung                                      | 515     | 0.341   | 8.1e-14 | 1.00    |
| Pancreas                                  | 305     | 0.333   | 8.1e-4  | 1.00    |
| Spleen                                    | 227     | 0.328   | 1.5e-10 | 1.00    |
| Adipose - Visceral (Omentum)              | 469     | 0.314   | 3.2e-6  | 1.00    |
| Nerve - Tibial                            | 532     | 0.310   | 1.6e-6  | 1.00    |
| Esophagus - Muscularis                    | 465     | 0.283   | 6.4e-5  | 1.00    |
| Prostate                                  | 221     | 0.280   | 2.2e-3  | 0.999   |
| Vagina                                    | 141     | 0.277   | 0.05    | 0.956   |
| Small Intestine - Terminal Ileum          | 174     | 0.268   | 1.3e-6  | 1.00    |
| Ovary                                     | 167     | 0.263   | 0.08    | 0.963   |
| Uterus                                    | 129     | 0.247   | 0.05    | 0.972   |
| Whole Blood                               | 670     | 0.224   | 2.1e-12 | 1.00    |
| Artery - Coronary                         | 213     | 0.220   | 3.3e-3  | 0.997   |
| Heart - Left Ventricle                    | 386     | 0.210   | 0.01    | 0.995   |
| Colon - Sigmoid                           | 318     | 0.200   | 0.009   | 1.00    |
| Esophagus - Mucosa                        | 497     | 0.199   | 2.7e-6  | 1.00    |
| Thyroid                                   | 574     | 0.194   | 3.1e-5  | 1.00    |
| Colon - Transverse                        | 368     | 0.180   | 9.1e-6  | 1.00    |
| Artery - Tibial                           | 584     | 0.177   | 1.7e-3  | 1.00    |
| Breast - Mammary Tissue                   | 396     | 0.173   | 3.9e-3  | 1.00    |
| Stomach                                   | 324     | 0.172   | 2.0e-5  | 1.00    |
| Adipose - Subcutaneous                    | 581     | 0.164   | 8.2e-4  | 0.997   |
| Muscle - Skeletal                         | 706     | 0.158   | 0.009   | 0.990   |
| Artery - Aorta                            | 387     | 0.156   | 3.6e-3  | 0.994   |
| Brain - Substantia nigra                  | 114     | 0.155   | 0.3     | 0.856   |
| Brain - Spinal cord (cervical c-1)        | 126     | 0.151   | 0.3     | 0.866   |
| Brain - Amygdala                          | 129     | 0.145   | 0.4     | 0.833   |
| Kidney - Cortex                           | 73      | 0.110   | 0.5     | 0.818   |
| Heart - Atrial Appendage                  | 372     | 0.109   | 0.2     | 0.862   |
| Pituitary                                 | 237     | 0.109   | 0.2     | 0.837   |
| Esophagus - Gastroesophageal Junction     | 330     | 0.0890  | 0.3     | 0.717   |
| Brain - Frontal Cortex (BA9)              | 175     | 0.0760  | 0.6     | 0.751   |
| Skin - Not Sun Exposed (Suprapubic)       | 517     | 0.0709  | 0.3     | 0.396   |
| Brain - Hypothalamus                      | 170     | 0.0658  | 0.6     | 0.667   |
| Adrenal Gland                             | 233     | 0.0580  | 0.6     | 0.654   |
| Liver                                     | 208     | 0.0505  | 0.6     | 0.477   |
| Brain - Caudate (basal ganglia)           | 194     | 0.0288  | 0.8     | 0.551   |
| Cells - Cultured fibroblasts              | 483     | 0.00843 | 0.9     | 0.0150  |
| Brain - Anterior cingulate cortex (BA24)  | 147     | -       | -       | -       |
| Brain - Cerebellar Hemisphere             | 175     | -       | -       | -       |
| Brain - Cerebellum                        | 209     | -       | -       | -       |
| Brain - Cortex                            | 205     | -0.0147 | 0.9     | 0.486   |
| Brain - Hippocampus                       | 165     | -0.0379 | 0.8     | 0.460   |
| Brain - Putamen (basal ganglia)           | 170     | -0.0926 | 0.6     | 0.402   |
| Brain - Nucleus accumbens (basal ganglia) | 202     | -0.242  | 0.05    | 0.0560  |
| Skin - Sun Exposed (Lower leg)            | 605     | -0.318  | 1.1e-7  | 0.00    |

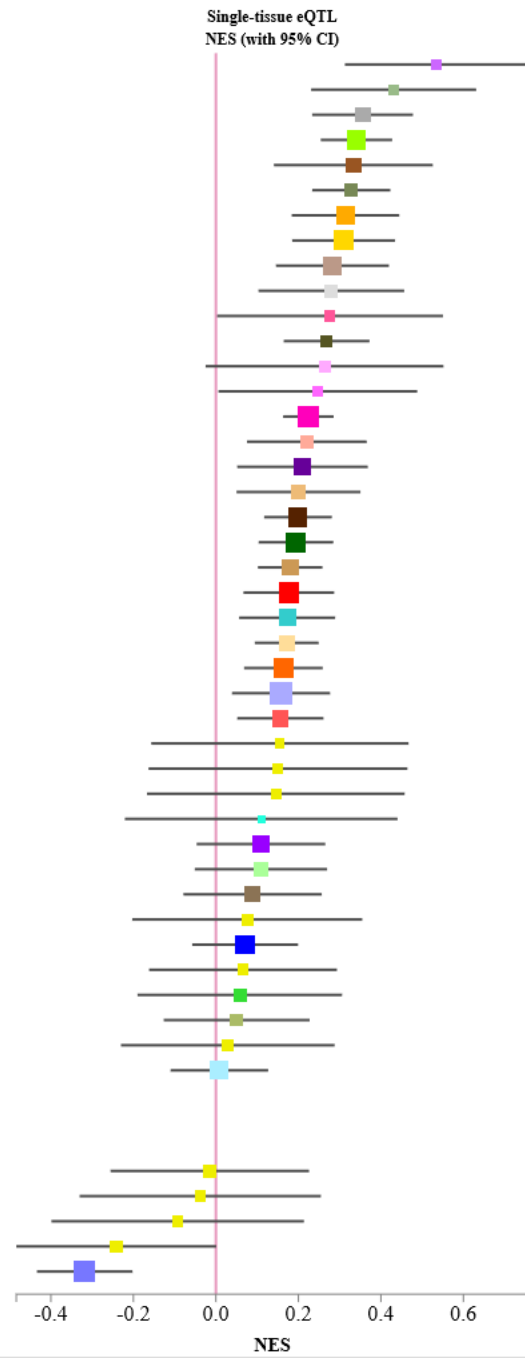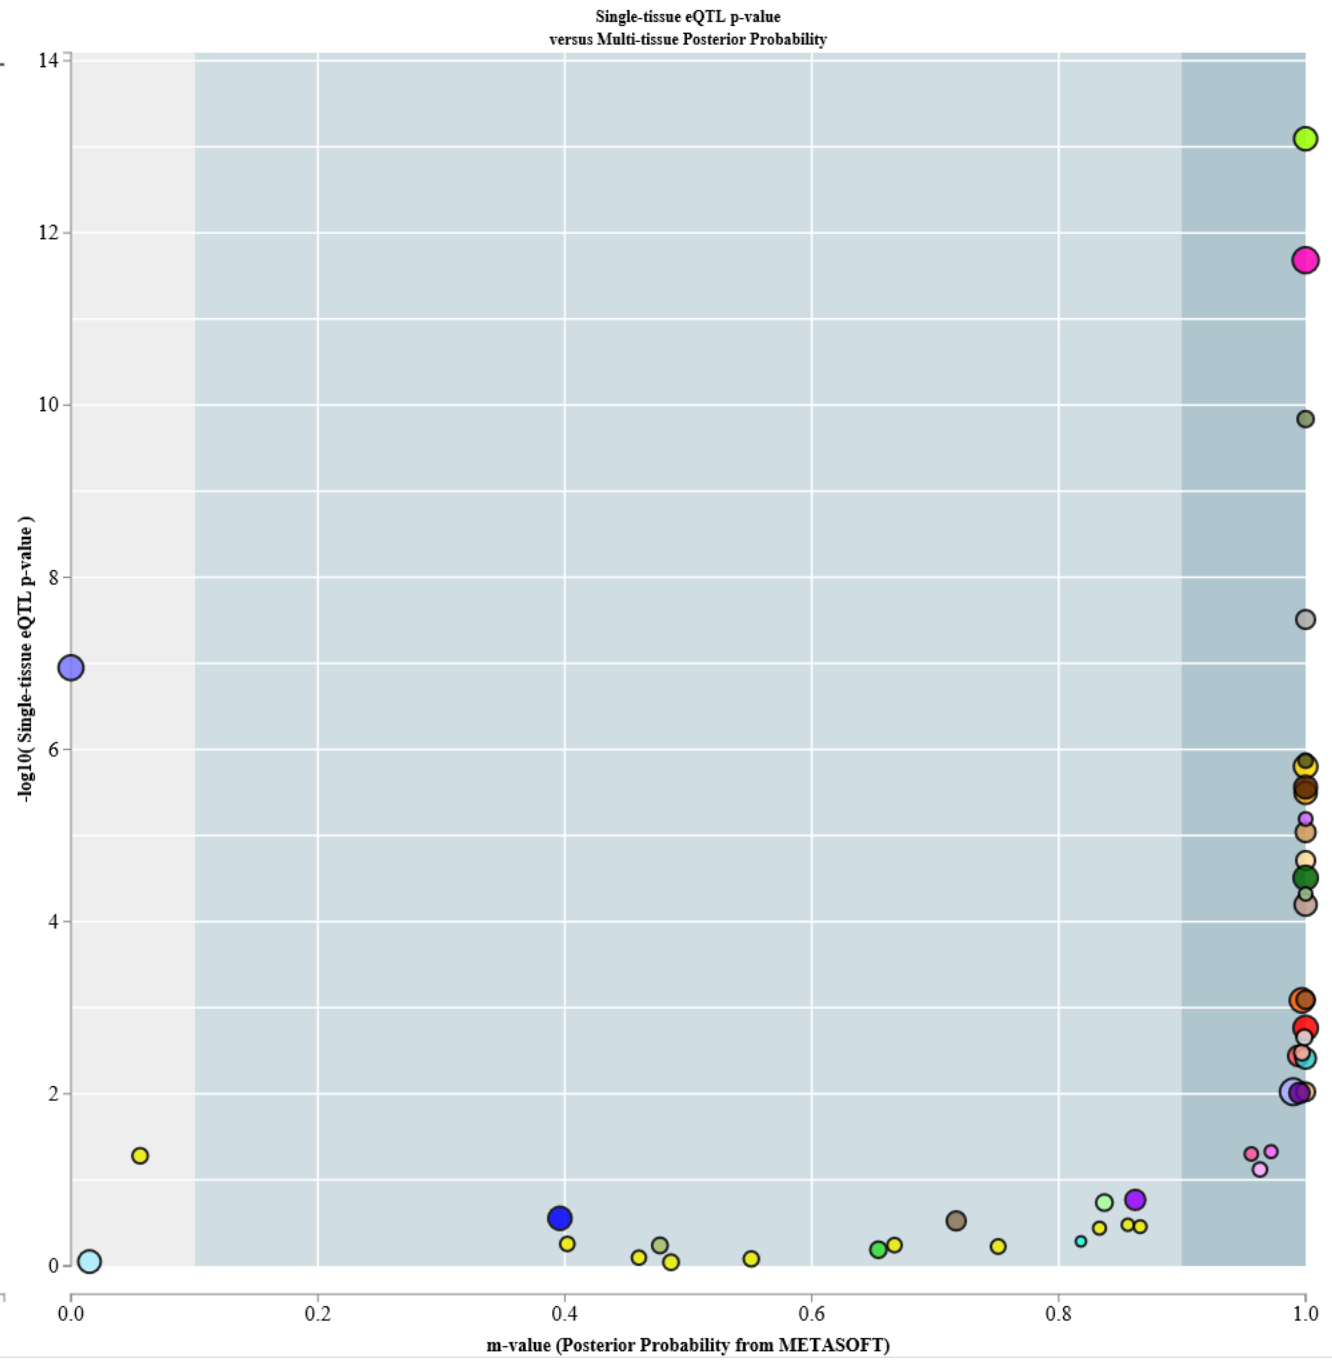

Gene expression for IRF4 (ENSG00000137265.14)

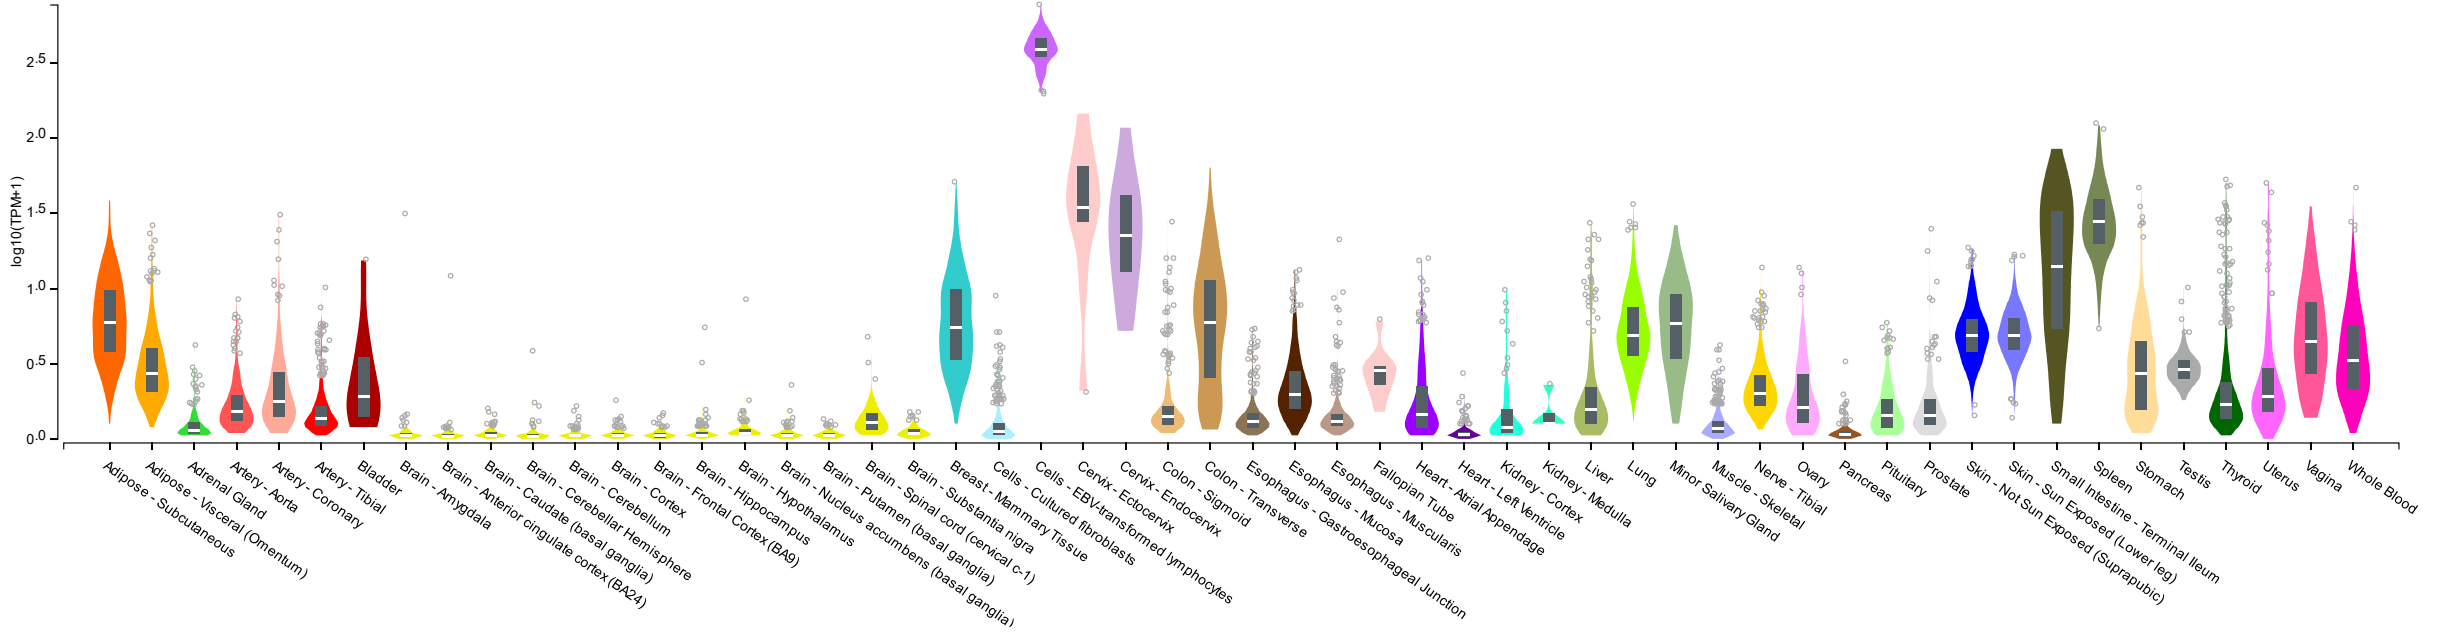

Supplement: Supplementary file [file media-1.pdf]
